# Supplementary material for: Immunoinformatics Approach to Design a Multi-Epitope Nanovaccine against Leishmania Parasite: Elicitation of Cellular Immune Responses
Source: MDPI journal article supplement (doi:10.3390/vaccines11020304), 2023-01-30
Supplement: s1 [file s1]

Table S2. MHCI and MHCII epitopes selected as candidates for vaccine construct

| No  | Protein (Code)                                 | MHCI Epitopes     | MHCII Epitopes          |
|-----|------------------------------------------------|-------------------|-------------------------|
| 1-3 | LinJ.08.1290/<br>LinJ.08.1280/<br>LinJ.21.2240 | 60-VPRAVLMDL-68   | 57-GRYVPRAVLMDLEPG-71   |
|     |                                                | 78-AGPYGQLFR-86   | 160-PDRIMMTFSVIPSPR-174 |
|     |                                                | 105-HYTEGAELI-113 | 161-DRIMMTFSVIPSPRV-175 |
|     |                                                | 143-TGSGMGTL-151  | 162-RIMMTFSVIPSPRVS-176 |
|     |                                                | 159-YPDRIMMTF-167 | 163-IMMTFSVIPSPRVS-177  |
|     |                                                | 242-FPGQLNSDL-250 | 221-TFGDLNHLVAAVMSG-235 |
|     |                                                | 258-VPFRLHFF-266  | 305-PRHGRYLTASALFRG-319 |
|     |                                                | 259-PFRLHFFM-267  | 306-RHGRYLTASALFRGR-320 |
|     |                                                | 260-FPRLHFFMM-268 | 307-HGRYLTASALFRGRM-321 |
|     |                                                | 345-IPNNIKSSI-353 | 308-GRYLTASALFRGRMS-322 |
|     |                                                | 366-TFIGNNTCI-374 | 309-RYLTASALFRGRMST-323 |
|     |                                                | 381-VGEQFTGMF-389 | 382-GEQFTGMFRRKAFLH-396 |
|     |                                                | 386-TGMFRRKAF-394 |                         |
|     |                                                |                   |                         |
|     |                                                |                   |                         |
| 4   | LinJ.36.5660                                   | 21-SYVPSEALM-29   | 30-HEDGQFLRAFLLRVL-44   |
|     |                                                | 169-NPNAAAMAL-177 | 31-EDGQFLRAFLLRVLA-45   |
|     |                                                |                   | 32-DGQFLRAFLLRVLAN-46   |
|     |                                                |                   | 33-GQFLRAFLLRVLAND-47   |
|     |                                                |                   | 34-QFLRAFLLRVLANDM-48   |
|     |                                                |                   | 35-FLRAFLLRVLANDMQ-49   |
|     |                                                |                   | 37-RAFLLRVLANDMQRM-51   |
|     |                                                |                   | 46-NDMQRMLATNTCAAY-60   |
|     |                                                |                   | 96-SKLLRTYVERAEYAA-110  |
|     |                                                |                   | 209-AVEFRENRRRMAQV-223  |
| 5   | LinJ.35.1030                                   | 103-RRLSLKTTL-111 | 94-LEDLFSFCGRRLSLK-108  |
|     |                                                | 170-IPYKEGKSL-178 | 95-EDLFSFCGRRLSLKT-109  |
|     |                                                | 18-GSGSFGEIF-26   | 96-DLFSFCGRRLSLKTT-110  |
|     |                                                | 52-TYESRFYRI-60   | 121-IEFVHSKSVLHRDIK-135 |
|     |                                                | 90-LGPSLEDLF-98   | 254-AAYMNYVRALRFEDK-268 |
|     |                                                | 122-EFVHSKSVL-130 | 255-AYMNYVRALRFEDKP-269 |
|     |                                                | 160-KYRDPRTHA-168 |                         |
|     |                                                | 162-RDPRTHAHI-170 |                         |
|     |                                                | 179-TGTARYCSI-187 |                         |
|     |                                                | 183-RYCSINTHM-191 |                         |
| 6   | LinJ.28.0210                                   | 255-AYMNYVRAL-269 |                         |
|     |                                                | 128-KYNASRGEA-136 | 41-RSQHWDLYIHRALRR-55   |
|     |                                                |                   | 42-SQHWDLYIHRALRRF-56   |
|     |                                                |                   | 43-QHWDLYIHRALRRFF-57   |
|     |                                                |                   | 44-HWDLYIHRALRRFFK-58   |
|     |                                                |                   | 45-WDLYIHRALRRFFKR-59   |
|     |                                                |                   | 46-DLYIHRALRRFFKRG-60   |
|     |                                                |                   | 51-RALRRFFKRGTLKA-65    |
|     |                                                |                   | 53-LRRFFKRGTLKAAV-67    |
|     |                                                |                   | 56-FFKRGTLKAAVRVL-70    |

Table S2. MHCI and MHCII epitopes selected as candidates for vaccine construct

|   |              |                   |                         |
|---|--------------|-------------------|-------------------------|
|   |              |                   | 61-TLSKAAVRVLSSFIE-75   |
|   |              |                   | 63-SKAAVRVLSSFIEDM-77   |
|   |              |                   | 75-EDMFNRIQTEAVFVA-89   |
|   |              |                   | 76-DMFNRIQTEAVFVAK-90   |
|   |              |                   | 77-MFNRIQTEAVFVAKI-91   |
|   |              |                   | 81-IQTEAVFVAKINKVK-95   |
|   |              |                   | 83-TEAVFVAKINKVKTL-97   |
|   |              |                   | 84-EAVFVAKINKVKTLT-98   |
|   |              |                   | 85-AVFVAKINKVKTLTA-99   |
|   |              |                   | 86-VFVAKINKVKTLTAR-100  |
|   |              |                   | 88-VAKINKVKTLTAREI-102  |
|   |              |                   | 89-AKINKVKTLTAREIQ-103  |
|   |              |                   | 91-INKVKTLTAREIQTS-115  |
| 7 | LinJ.34.3620 | 58-VPLSDQVKL-66   | 1-MLRFFRARLAPTTTD-15    |
|   |              | 177-KYHLKAVVL-185 | 2-LRFFRARLAPTTTDA-16    |
|   |              |                   | 26-VNKTWFRHNLIRRK-40    |
|   |              |                   | 74-CKHVRLIAKATAERF-88   |
|   |              |                   | 75-KHVRLIAKATAERFA-89   |
|   |              |                   | 76-HVRLIAKATAERFAH-90   |
|   |              |                   | 87-RFAHCRVFPVAHVRV-101  |
|   |              |                   | 88-FAHCRVFPVAHVRVS-102  |
|   |              |                   | 90-HCRVFPVAHVRVSVQ-114  |
|   |              |                   | 91-CRVFPVAHVRVSVQR-115  |
|   |              |                   | 92-RVFPVAHVRVSVQRF-116  |
|   |              |                   | 176-HKYHLKAVVLANFFV-190 |
| 8 | LinJ.35.1540 | 244-VPIPNEGLF-252 | 1-MFRRSFISAFQATRA-15    |
|   |              | 246-IPNEGLFNG-252 | 2-FRRSFISAFQATRAA-16    |
|   |              | 281-VPPYRWIDD-289 | 3-RRSFISAFQATRAAR-17    |
|   |              |                   | 4-RSFISAFQATRAARV-18    |
|   |              |                   | 5-SFISAFQATRAARVS-19    |
|   |              |                   | 6-FISAFQATRAARVSL-20    |
|   |              |                   | 7-ISAFQATRAARVSLV-21    |
|   |              |                   | 8-SAFQATRAARVSLVF-22    |
|   |              |                   | 9-AFQATRAARVSLVFK-23    |
|   |              |                   | 10-FQATRAARVSLVFKQ-24   |
|   |              |                   | 111-EFFRKHILKPKLADD-125 |
|   |              |                   | 141-MLGFVILMARYAVLP-155 |
|   |              |                   | 142-LGFVILMARYAVLPL-156 |
|   |              |                   | 143-GFVILMARYAVLPLW-157 |
|   |              |                   | 146-ILMARYAVLPLWYVG-160 |
|   |              |                   | 163-AMSMVGQMNIEAEIG-177 |
|   |              |                   | 186-TVVWRGKPVFVYRRS-190 |
|   |              |                   | 191-GKPVFVYRRSARQMK-105 |
|   |              |                   | 201-ARQMKEVMETPLSAL-215 |
| 9 | LinJ.21.0440 | 5-SYQAGFLSI-13    | 74-PFLVMIKNMKKYFS-90    |
|   |              | 9-GFLSILYSI-17    | 146-TNYVETLRVQVHANC-160 |

Table S2. MHCI and MHCII epitopes selected as candidates for vaccine construct

|    |              |                   |                         |
|----|--------------|-------------------|-------------------------|
|    |              | 14-LYSIGSKPL-22   | 161-RIRRLYFSDRLYAAE-175 |
|    |              | 81-KNMKKYFSF-89   |                         |
|    |              | 85-KYFSFEVTI-99   |                         |
|    |              | 177-LPPEFKLFL-191 |                         |
| 10 | LinJ.36.6680 | 37-NYLKRVRGI-45   | 36-ANYLKRVRGIKAKLA-50   |
|    |              | 81-GPKNALPGF-89   | 37-NYLKRVRGIKAKLAQ-51   |
|    |              | 184-THPELKATF-192 | 38-YLKRVRGIKAKLAQK-52   |
|    |              | 230-VTPSGKVW-238  | 39-LKRVRGIKAKLAQKA-53   |
|    |              | 238-WGKYAQVTN-246 | 41-RVRGIKAKLAQKARY-55   |
|    |              | 240-KYAQVTNNP-248 | 165-PKMERFIRPMALRFK-179 |
|    |              |                   | 166-KMERFIRPMALRFKK-180 |
|    |              |                   | 167-MERFIRPMALRFKKA-181 |
|    |              |                   | 168-ERFIRPMALRFKKAH-182 |
|    |              |                   | 169-RFIRPMALRFKKAHV-183 |
|    |              |                   | 205-GKMYTGLGVITKGSV-219 |
| 11 | LinJ.16.0470 | 6-GYKSGTRHL-14    | 106-KAKEHQFQAYLAAKK-120 |
|    |              | 22-HGAPSVSTI-30   | 140-PKNVEVLARRVADYE-154 |
|    |              | 55-KYYHGRTGI-63   |                         |
|    |              | 67-VTPRGVGV-75    |                         |
|    |              | 114-AYLAAKKAG-122 |                         |
| 12 | LinJ.32.0930 | 3-KPHLRHYQV-11    | 36-FVVAKSFRWRMMRVK-50   |
|    |              | 21-NPEPTVYKF-29   | 41-SRFRWRMMRVKNKVKA-55  |
|    |              | 131-IPDHEVKHL-139 | 117-RARYHNIEVLNVKSI-131 |
|    |              | 145-HAPNLSFPL-153 | 136-VKHLSIAQYHAPNLS-150 |
|    |              | 146-APNLSFPLL-154 | 148-NLSFPLLQRRIKAAR-162 |
| 13 | LinJ.24.0040 | 39-MPLRKAQQL-47   | 45-QQLYRQVLAKTRCIP-59   |
|    |              | 87-SVVAMMSLL-95   | 82-RWPRKSVVAMMSLLK-96   |
|    |              | 138-PYMCSPCHV-146 | 83-WPRKSVVAMMSLLKN-97   |
|    |              | 142-SPCHVQLFM-150 | 84-PRKSVVAMMSLLKNA-98   |
|    |              |                   | 85-RKSVVAMMSLLKNAE-99   |
|    |              |                   | 86-KSVVAMMSLLKNAEA-100  |
|    |              |                   | 89-VAMMSLLKNAEANAI-103  |
|    |              |                   | 92-MSLLKNAEANAEIKG-106  |
|    |              |                   | 111-QMVIKHVQVDQAARM-125 |
| 14 | LinJ.22.1300 | 51-VVPRTSENF-59   | 1-MWCLSRVALQSNRAA-15    |
|    |              | 108-GYPFPDES-116  | 2-WCLSRVALQSNRAAL-16    |
|    |              | 134-GPNQNGSQF-142 | 3-CLSRVALQSNRAALY-17    |
|    |              | 136-NQNGSQFFF-142 | 4-LSRVALQSNRAALYM-18    |
|    |              | 155-KFVVVGQVL-163 | 5-SRVALQSNRAALYMP-19    |
|    |              | 216-MPGKEVLDL-222 | 6-RVALQSNRAALYMPY-20    |
|    |              |                   | 7-VALQSNRAALYMPYT-21    |
|    |              |                   | 13-RAALYMPYTPVAANP-27   |
| 15 | LinJ.27.1450 |                   | 61-ESPFVQIAGYRVPH-75    |
| 16 | LinJ.28.2200 | 4-FHPRDAFIL-12    | 61-NPLRHVLMQNAAVTS-75   |
|    |              | 80-IPHPLEPKM-88   | 66-VLMQNAAVTSAGYAI-70   |
|    |              | 82-HPLEPKMLL-90   | 86-PKMLLHVQASDYAVE-100  |

Table S2. MHCI and MHCII epitopes selected as candidates for vaccine construct

|    |              |                   |                         |
|----|--------------|-------------------|-------------------------|
|    |              |                   | 121-DNCMVEQHRMAAATQ-135 |
| 17 | LinJ.34.0420 | 109-QNAAAYFPL-117 | 19-SQALREIAANIYNHG-33   |
|    |              | 113-AYFPLDTFT-121 | 58-AITYARYVTLQLDMG-72   |
|    |              | 115-FPLDTFTRL-123 |                         |
|    |              | 119-TFTRLEEEI-127 |                         |
| 18 | LinJ.28.2940 | 235-ESPINQIAF-243 | 246-NRFWMCVATERSLSV-260 |
|    |              | 19-CPQQAGSYI-27   | 247-RFWMCVATERSLSVY-261 |
|    |              | 25-SYIKVVSTS-33   | 249-WMCVATERSLSVYDL-263 |
|    |              | 195-NYVSTVTVS-203 |                         |
|    |              | 230-FKINVESPI-238 |                         |
| 19 | LinJ.10.0050 | 109-RPHGNAGMM-117 | 90-MRAVGGVRTKSPGPG-113  |
| 20 | LinJ.33.1560 | 102-SPFGYEHAM-110 |                         |
| 21 | LinJ.18.0650 | 81-HYYLVLELV-89   | 51-EDQMLREVAIMRSLR-65   |
|    |              | 121-YYCHSKGFA-129 | 52-DQMLREVAIMRSLRQ-66   |
|    |              | 181-GYNGLSADI-189 | 53-QMLREVAIMRSLRQQ-67   |
|    |              | 196-LYVMLAGRL-204 | 54-MLREVAIMRSLRQQN-68   |
|    |              |                   | 55-LREVAIMRSLRQQNV-69   |
|    |              |                   | 56-REVAIMRSLRQQNVV-70   |
|    |              |                   | 57-EVAIMRSLRQQNVVK-71   |
|    |              |                   | 58-VAIMRSLRQQNVVKL-72   |
|    |              |                   | 195-VLYVMLAGRLPFEDR-209 |
| 22 | LinJ.20.0250 | 71-YYWAILCAV-79   | 69-REYYWAILCAVLGYL-83   |
|    |              | 81-GYLAHALV-89    | 72-YWAILCAVLGYLAH-86    |
|    |              | 134-VYSKRKAHV-142 | 76-LCAVLGYLAHALVF-90    |
|    |              |                   | 77-CAVLGYLAHALVFN-91    |
|    |              |                   | 78-AVLGYLAHALVFNY-92    |
|    |              |                   | 79-VLGYLAHALVFNY-93     |
|    |              |                   | 121-AVDEMVGSLVLESVY-135 |
|    |              |                   | 122-VDEMVGSLVLESVYS-136 |
|    |              |                   | 125-MVGLSVLESVYSKRK-139 |
| 23 | LinJ.35.3810 | 70-KPTINLNNL-78   | 76-NNLSRLIAAEEA-90      |
|    |              |                   | 78-LSRLIAAEEA-92        |
|    |              |                   | 114-HIQVPCIVKARYVSK-128 |
| 24 | LinJ.20.0600 | 56-SPITCNFEY-64   | 16-RANAFSRLPIARIQ-30    |
|    |              |                   | 17-ANAFSRLPIARIQR-31    |
|    |              |                   | 18-NAFFSRLPIARIQRA-32   |
|    |              |                   | 19-AFFSRLPIARIQRAL-33   |
|    |              |                   | 20-FFSRLPIARIQRALA-34   |
|    |              |                   | 21-FSRLPIARIQRALAM-35   |
|    |              |                   | 22-SRLPIARIQRALAME-36   |
|    |              |                   | 23-RLPIARIQRALAMEA-37   |
|    |              |                   | 24-LPIARIQRALAMEAI-38   |
|    |              |                   | 25-PIARIQRALAMEAIK-39   |
|    |              |                   | 26-IARIQRALAMEAIKK-40   |
|    |              |                   | 27-ARIQRALAMEAIKKG-41   |
|    |              |                   | 32-ALAMEAIKKGSMKPW-46   |

Table S2. MHCI and MHCII epitopes selected as candidates for vaccine construct

|    |              |                   |                         |
|----|--------------|-------------------|-------------------------|
|    |              |                   | 66-PRPVRLIGTVMDAHT-80   |
| 25 | LinJ.28.0780 | 34-TNPYNRMFW-42   | 3-QCTSLLCRKALQAYP-17    |
|    |              | 100-KPQRESRHL-108 | 4-CTSLLCRKALQAYPV-18    |
|    |              | 111-MPMTPRVVF-119 | 5-TSLLCRKALQAYPVP-19    |
|    |              |                   | 6-SLLCRKALQAYVPP-20     |
|    |              |                   | 7-LLCRKALQAYVPPR-21     |
|    |              |                   | 8-LCRKALQAYVPPRA-22     |
|    |              |                   | 9-CRKALQAYVPPRAR-23     |
|    |              |                   | 10-RKALQAYVPPRARN-24    |
|    |              |                   | 19-PPRARNYERRWSSSR-33   |
|    |              |                   | 20-PRARNYERRWSSSRT-34   |
|    |              |                   | 21-RARNYERRWSSSRTN-35   |
|    |              |                   | 22-ARNYERRWSSSRTNP-36   |
|    |              |                   | 33-RTNPYNRMFWRTVLN-47   |
|    |              |                   | 34-TNPYNRMFWRTVLNE-48   |
|    |              |                   | 35-NPYNRMFWRTVLNED-49   |
|    |              |                   | 49-DFARPSFWVSDFRHK-63   |
|    |              |                   | 50-FARPSFWVSDFRHKY-64   |
|    |              |                   | 51-ARPSFWVSDFRHKYL-65   |
|    |              |                   | 52-RPSFWVSDFRHKYLA-66   |
|    |              |                   | 53-PSFWVSDFRHKYLAK-67   |
|    |              |                   | 54-SFWVSDFRHKYLAKH-68   |
|    |              |                   | 55-FWVSDFRHKYLAKHG-69   |
|    |              |                   | 57-VSDFRHKYLAKHGMD-71   |
|    |              |                   | 60-FRHKYLAKHGMDYQG-74   |
|    |              |                   | 69-GMDYQGRVPASPAPG-83   |
|    |              |                   | 70-MDYQGRVPASPAPGM-84   |
|    |              |                   | 71-DYQGRVPASPAPGMY-85   |
|    |              |                   | 101-PQRESRHLPVMPMTP-115 |
|    |              |                   | 102-QRESRHLPVMPMTPR-116 |
|    |              |                   | 103-RESRHLPVMPMTPRV-117 |
|    |              |                   | 104-ESRHLPVMPMTPRVV-118 |
|    |              |                   | 105-SRHLPVMPMTPRVVF-119 |
|    |              |                   | 106-RHLPVMPMTPRVVFE-120 |
|    |              |                   | 115-PRVVFEHAQEKRIDY-129 |
|    |              |                   | 124-EKRIDYAKKMHRDRR-138 |
|    |              |                   | 125-KRIDYAKKMHRDRRL-139 |
|    |              |                   | 126-RIDYAKKMHRDRRLV-140 |
|    |              |                   | 127-IDYAKKMHRDRRLVE-141 |
|    |              |                   | 128-DYAKKMHRDRRLVEQ-142 |
|    |              |                   | 129-YAKKMHRDRRLVEQL-143 |
|    |              |                   | 134-HRDRRLVEQLRTHEF-148 |
|    |              |                   | 135-RDRRLVEQLRTHEFW-149 |
|    |              |                   | 145-THEFWGWYMKLQVR-159  |
|    |              |                   | 146-HEFWGWYMKLQVRG-160  |
|    |              |                   | 147-EFWGWYMKLQVRGR-161  |

Table S2. MHCI and MHCII epitopes selected as candidates for vaccine construct

|    |              |                 |                        |
|----|--------------|-----------------|------------------------|
|    |              |                 | 148-FWGWYMKLQVRGRW-162 |
|    |              |                 | 149-WGWYMKLQVRGRWC-163 |
|    |              |                 | 150-GWYMKLQVRGRWCK-164 |
|    |              |                 | 151-WYMKLQVRGRWCKE-165 |
|    |              |                 | 152-YMKLQVRGRWCKEH-166 |
| 26 | LinJ.33.3340 | 57-IAFDKHFNL-65 | 46-CRNSKALLAHVIAFD-60  |
|    |              | 89-LFLRGESVI-97 |                        |
