# Supplementary material for: Immunoinformatics Approach to Design a Multi-Epitope Nanovaccine against Leishmania Parasite: Elicitation of Cellular Immune Responses
Source: MDPI journal article supplement (doi:10.3390/vaccines11020304), 2023-01-30
Supplement: s1 [file s1]

**Table S1.** Subcellular localization of proteins retrieved for TriTypDB database showing >80% homology among *L. infantum*, *L. major* and *L. braziliensis*.

## CELLO RESULTS

SeqID: li|LinJ\_30\_2820\_mRNA|

CELLO prediction:

| (predictor  | location      | reliable-index) |
|-------------|---------------|-----------------|
| Composition | Mitochondrial | 0.545           |
| Di-peptide  | Mitochondrial | 0.821           |
| part-Comp.  | Mitochondrial | 0.556           |
| chemo-typy  | Cytoplasmic   | 0.478           |
| Neighboring | Cytoplasmic   | 0.322           |

Combined SVM classifier:

|                |         |
|----------------|---------|
| Extracellular  | 0.120   |
| PlasmaMembrane | 0.034   |
| Cytoplasmic    | 1.319   |
| Cytoskeletal   | 0.020   |
| ER             | 0.031   |
| Golgi          | 0.011   |
| Lysosomal      | 0.019   |
| Mitochondrial  | 2.287 * |
| Chloroplast    | 0.420   |
| Peroxisomal    | 0.180   |
| Vacuole        | 0.016   |
| Nuclear        | 0.544   |

\*\*\*\*\*  
\*\*\*\*\*

SeqID: li|LinJ\_36\_1160\_mRNA|

CELLO prediction:

| (predictor  | location      | reliable-index) |
|-------------|---------------|-----------------|
| Composition | Nuclear       | 0.424           |
| Di-peptide  | Nuclear       | 0.471           |
| part-Comp.  | Nuclear       | 0.337           |
| chemo-typy  | Nuclear       | 0.693           |
| Neighboring | Mitochondrial | 0.377           |

Combined SVM classifier:

|                |         |
|----------------|---------|
| Extracellular  | 0.160   |
| PlasmaMembrane | 0.093   |
| Cytoplasmic    | 0.587   |
| Cytoskeletal   | 0.026   |
| ER             | 0.017   |
| Golgi          | 0.012   |
| Lysosomal      | 0.014   |
| Mitochondrial  | 1.442   |
| Chloroplast    | 0.351   |
| Peroxisomal    | 0.078   |
| Vacuole        | 0.017   |
| Nuclear        | 2.200 * |

\*\*\*\*\*  
\*\*\*\*\*

SeqID: li|LinJ\_27\_2320\_mRNA|

CELLO prediction:

| (predictor  | location      | reliable-index) |
|-------------|---------------|-----------------|
| Composition | Mitochondrial | 0.397           |

**Table S1.** Subcellular localization of proteins retrieved for TriTypDB database showing >80% homology among *L. infantum*, *L. major* and *L. braziliensis*.

|                             |                |                 |       |
|-----------------------------|----------------|-----------------|-------|
| Di-peptide                  | Nuclear        | 0.526           |       |
| part-Comp.                  | Mitochondrial  | 0.595           |       |
| chemo-typy                  | Mitochondrial  | 0.471           |       |
| Neighboring                 | Nuclear        | 0.359           |       |
| Combined SVM classifier:    |                |                 |       |
|                             | Extracellular  | 0.340           |       |
|                             | PlasmaMembrane | 0.149           |       |
|                             | Cytoplasmic    | 0.500           |       |
|                             | Cytoskeletal   | 0.023           |       |
|                             | ER             | 0.060           |       |
|                             | Golgi          | 0.023           |       |
|                             | Lysosomal      |                 | 0.023 |
|                             | Mitochondrial  | 1.992           | *     |
|                             | Chloroplast    | 0.669           |       |
|                             | Peroxisomal    | 0.088           |       |
|                             | Vacuole        | 0.030           |       |
|                             | Nuclear        | 1.103           |       |
| *****                       |                |                 |       |
| *****                       |                |                 |       |
| SeqID: li LinJ_18_0650_mRNA |                |                 |       |
| CELLO prediction:           |                |                 |       |
| (predictor                  | location       | reliable-index) |       |
| Composition                 | Cytoplasmic    | 0.337           |       |
| Di-peptide                  | Nuclear        | 0.389           |       |
| part-Comp.                  | Nuclear        | 0.375           |       |
| chemo-typy                  | Mitochondrial  | 0.368           |       |
| Neighboring                 | Cytoplasmic    | 0.350           |       |
| Combined SVM classifier:    |                |                 |       |
|                             | Extracellular  | 0.095           |       |
|                             | PlasmaMembrane | 0.121           |       |
|                             | Cytoplasmic    | 1.582           | *     |
|                             | Cytoskeletal   | 0.015           |       |
|                             | ER             | 0.020           |       |
|                             | Golgi          | 0.035           |       |
|                             | Lysosomal      |                 | 0.018 |
|                             | Mitochondrial  | 1.303           | *     |
|                             | Chloroplast    | 0.204           |       |
|                             | Peroxisomal    | 0.126           |       |
|                             | Vacuole        | 0.009           |       |
|                             | Nuclear        | 1.471           | *     |
| *****                       |                |                 |       |
| *****                       |                |                 |       |
| SeqID: li LinJ_35_4150_mRNA |                |                 |       |
| CELLO prediction:           |                |                 |       |
| (predictor                  | location       | reliable-index) |       |
| Composition                 | Mitochondrial  | 0.292           |       |
| Di-peptide                  | Cytoplasmic    | 0.331           |       |
| part-Comp.                  | Cytoplasmic    | 0.339           |       |
| chemo-typy                  | Mitochondrial  | 0.604           |       |
| Neighboring                 | Cytoplasmic    | 0.378           |       |
| Combined SVM classifier:    |                |                 |       |
|                             | Extracellular  | 0.680           |       |
|                             | PlasmaMembrane | 0.031           |       |
|                             | Cytoplasmic    | 1.505           | *     |

**Table S1.** Subcellular localization of proteins retrieved for TriTypDB database showing >80% homology among *L. infantum*, *L. major* and *L. braziliensis*.

|               |       |       |
|---------------|-------|-------|
| Cytoskeletal  | 0.027 |       |
| ER            | 0.025 |       |
| Golgi         | 0.028 |       |
| Lysosomal     |       | 0.012 |
| Mitochondrial | 1.374 | *     |
| Chloroplast   | 0.271 |       |
| Peroxisomal   | 0.030 |       |
| Vacuole       | 0.008 |       |
| Nuclear       | 1.009 | *     |

\*\*\*\*\*  
\*\*\*\*\*

SeqID: li|LinJ\_07\_0520\_mRNA|

CELLO prediction:

| (predictor  | location       | reliable-index) |
|-------------|----------------|-----------------|
| Composition | Mitochondrial  | 0.457           |
| Di-peptide  | Cytoplasmic    | 0.351           |
| part-Comp.  | PlasmaMembrane | 0.503           |
| chemo-typy  | Nuclear        | 0.315           |
| Neighboring | PlasmaMembrane | 0.682           |

Combined SVM classifier:

|                |       |       |
|----------------|-------|-------|
| Extracellular  | 0.338 |       |
| PlasmaMembrane | 1.694 | *     |
| Cytoplasmic    | 0.884 |       |
| Cytoskeletal   | 0.054 |       |
| ER             | 0.031 |       |
| Golgi          | 0.026 |       |
| Lysosomal      |       | 0.024 |
| Mitochondrial  | 1.049 | *     |
| Chloroplast    | 0.300 |       |
| Peroxisomal    | 0.093 |       |
| Vacuole        | 0.013 |       |
| Nuclear        | 0.494 |       |

\*\*\*\*\*  
\*\*\*\*\*

SeqID: li|LinJ\_09\_0970\_mRNA|

CELLO prediction:

| (predictor  | location    | reliable-index) |
|-------------|-------------|-----------------|
| Composition | Nuclear     | 0.679           |
| Di-peptide  | Cytoplasmic | 0.897           |
| part-Comp.  | Cytoplasmic | 0.600           |
| chemo-typy  | Cytoplasmic | 0.754           |
| Neighboring | Cytoplasmic | 0.790           |

Combined SVM classifier:

|                |       |       |
|----------------|-------|-------|
| Extracellular  | 0.033 |       |
| PlasmaMembrane | 0.027 |       |
| Cytoplasmic    | 3.232 | *     |
| Cytoskeletal   | 0.012 |       |
| ER             | 0.101 |       |
| Golgi          | 0.043 |       |
| Lysosomal      |       | 0.004 |
| Mitochondrial  | 0.065 |       |
| Chloroplast    | 0.163 |       |
| Peroxisomal    | 0.018 |       |
| Vacuole        | 0.021 |       |
| Nuclear        | 1.280 |       |

**Table S1.** Subcellular localization of proteins retrieved for TriTypDB database showing >80% homology among *L. infantum*, *L. major* and *L. braziliensis*.

```

*****
*****
SeqID: li|LinJ_31_3320_mRNA|
      CELLO prediction:
              (predictor      location      reliable-index)
      Composition      Cytoplasmic      0.379
      Di-peptide       Nuclear         0.696
      part-Comp.       Nuclear         0.615
      chemo-typy       Nuclear         0.755
      Neighboring      Nuclear         0.503

      Combined SVM classifier:
                                Extracellular  0.128
                                PlasmaMembrane 0.035
                                Cytoplasmic     0.773
                                Cytoskeletal    0.013
                                ER               0.013
                                Golgi           0.007
                                Lysosomal              0.008
                                Mitochondrial  0.940
                                Chloroplast     0.274
                                Peroxisomal     0.034
                                Vacuole         0.016
                                Nuclear         2.760 *

*****
*****
SeqID: li|LinJ_03_0240_mRNA|
      CELLO prediction:
              (predictor      location      reliable-index)
      Composition      Cytoplasmic      0.341
      Di-peptide       Mitochondrial  0.610
      part-Comp.       Nuclear         0.778
      chemo-typy       Mitochondrial  0.589
      Neighboring      Nuclear         0.467

      Combined SVM classifier:
                                Extracellular  0.266
                                PlasmaMembrane 0.042
                                Cytoplasmic     0.778
                                Cytoskeletal    0.018
                                ER               0.021
                                Golgi           0.016
                                Lysosomal              0.010
                                Mitochondrial  1.639 *
                                Chloroplast     0.188
                                Peroxisomal     0.026
                                Vacuole         0.012
                                Nuclear         1.983 *

*****
*****
SeqID: li|LinJ_35_3840_mRNA|
      CELLO prediction:
              (predictor      location      reliable-index)
      Composition      Mitochondrial  0.385
      Di-peptide       Mitochondrial  0.624

```

**Table S1.** Subcellular localization of proteins retrieved for TriTypDB database showing >80% homology among *L. infantum*, *L. major* and *L. braziliensis*.

|                             |             |                |                 |       |
|-----------------------------|-------------|----------------|-----------------|-------|
|                             | part-Comp.  | Cytoplasmic    | 0.340           |       |
|                             | chemo-typy  | Mitochondrial  | 0.352           |       |
|                             | Neighboring | Mitochondrial  | 0.416           |       |
| Combined SVM classifier:    |             |                |                 |       |
|                             |             | Extracellular  | 0.313           |       |
|                             |             | PlasmaMembrane | 0.143           |       |
|                             |             | Cytoplasmic    | 1.111           |       |
|                             |             | Cytoskeletal   | 0.013           |       |
|                             |             | ER             | 0.023           |       |
|                             |             | Golgi          | 0.012           |       |
|                             |             | Lysosomal      |                 | 0.020 |
|                             |             | Mitochondrial  | 1.937           | *     |
|                             |             | Chloroplast    | 0.756           |       |
|                             |             | Peroxisomal    | 0.111           |       |
|                             |             | Vacuole        | 0.018           |       |
|                             |             | Nuclear        | 0.543           |       |
| *****                       |             |                |                 |       |
| *****                       |             |                |                 |       |
| SeqID: li LinJ_22_0720_mRNA |             |                |                 |       |
| CELLO prediction:           |             |                |                 |       |
|                             | (predictor  | location       | reliable-index) |       |
|                             | Composition | Nuclear        | 0.547           |       |
|                             | Di-peptide  | Nuclear        | 0.860           |       |
|                             | part-Comp.  | Nuclear        | 0.741           |       |
|                             | chemo-typy  | Mitochondrial  | 0.425           |       |
|                             | Neighboring | Nuclear        | 0.692           |       |
| Combined SVM classifier:    |             |                |                 |       |
|                             |             | Extracellular  | 0.070           |       |
|                             |             | PlasmaMembrane | 0.011           |       |
|                             |             | Cytoplasmic    | 0.527           |       |
|                             |             | Cytoskeletal   | 0.032           |       |
|                             |             | ER             | 0.013           |       |
|                             |             | Golgi          | 0.016           |       |
|                             |             | Lysosomal      |                 | 0.010 |
|                             |             | Mitochondrial  | 0.797           |       |
|                             |             | Chloroplast    | 0.432           |       |
|                             |             | Peroxisomal    | 0.057           |       |
|                             |             | Vacuole        | 0.017           |       |
|                             |             | Nuclear        | 3.019           | *     |
| *****                       |             |                |                 |       |
| *****                       |             |                |                 |       |
| SeqID: li LinJ_35_0190_mRNA |             |                |                 |       |
| CELLO prediction:           |             |                |                 |       |
|                             | (predictor  | location       | reliable-index) |       |
|                             | Composition | Nuclear        | 0.564           |       |
|                             | Di-peptide  | Cytoplasmic    | 0.349           |       |
|                             | part-Comp.  | Cytoplasmic    | 0.314           |       |
|                             | chemo-typy  | Chloroplast    | 0.478           |       |
|                             | Neighboring | Cytoplasmic    | 0.286           |       |
| Combined SVM classifier:    |             |                |                 |       |
|                             |             | Extracellular  | 0.533           |       |
|                             |             | PlasmaMembrane | 0.078           |       |
|                             |             | Cytoplasmic    | 1.441           | *     |
|                             |             | Cytoskeletal   | 0.021           |       |

**Table S1.** Subcellular localization of proteins retrieved for TriTypDB database showing >80% homology among *L. infantum*, *L. major* and *L. braziliensis*.

|                             |                |               |                 |
|-----------------------------|----------------|---------------|-----------------|
|                             | ER             | 0.129         |                 |
|                             | Golgi          | 0.068         |                 |
|                             | Lysosomal      |               | 0.081           |
|                             | Mitochondrial  | 0.275         |                 |
|                             | Chloroplast    | 0.811         |                 |
|                             | Peroxisomal    | 0.188         |                 |
|                             | Vacuole        | 0.047         |                 |
|                             | Nuclear        | 1.328         | *               |
| *****                       |                |               |                 |
| *****                       |                |               |                 |
| SeqID: li LinJ_11_1180_mRNA |                |               |                 |
| CELLO prediction:           |                |               |                 |
|                             | (predictor     | location      | reliable-index) |
|                             | Composition    | Mitochondrial | 0.520           |
|                             | Di-peptide     | Cytoplasmic   | 0.401           |
|                             | part-Comp.     | Mitochondrial | 0.431           |
|                             | chemo-typy     | Extracellular | 0.310           |
|                             | Neighboring    | Mitochondrial | 0.433           |
| Combined SVM classifier:    |                |               |                 |
|                             | Extracellular  | 0.468         |                 |
|                             | PlasmaMembrane | 0.245         |                 |
|                             | Cytoplasmic    | 1.045         |                 |
|                             | Cytoskeletal   | 0.022         |                 |
|                             | ER             | 0.032         |                 |
|                             | Golgi          | 0.013         |                 |
|                             | Lysosomal      |               | 0.014           |
|                             | Mitochondrial  | 1.868         | *               |
|                             | Chloroplast    | 0.752         |                 |
|                             | Peroxisomal    | 0.078         |                 |
|                             | Vacuole        | 0.015         |                 |
|                             | Nuclear        | 0.449         |                 |
| *****                       |                |               |                 |
| *****                       |                |               |                 |
| SeqID: li LinJ_33_2710_mRNA |                |               |                 |
| CELLO prediction:           |                |               |                 |
|                             | (predictor     | location      | reliable-index) |
|                             | Composition    | Mitochondrial | 0.644           |
|                             | Di-peptide     | Mitochondrial | 0.421           |
|                             | part-Comp.     | Extracellular | 0.341           |
|                             | chemo-typy     | Mitochondrial | 0.427           |
|                             | Neighboring    | Mitochondrial | 0.253           |
| Combined SVM classifier:    |                |               |                 |
|                             | Extracellular  | 0.811         |                 |
|                             | PlasmaMembrane | 0.306         |                 |
|                             | Cytoplasmic    | 0.559         |                 |
|                             | Cytoskeletal   | 0.015         |                 |
|                             | ER             | 0.200         |                 |
|                             | Golgi          | 0.019         |                 |
|                             | Lysosomal      |               | 0.131           |
|                             | Mitochondrial  | 1.984         | *               |
|                             | Chloroplast    | 0.680         |                 |
|                             | Peroxisomal    | 0.085         |                 |
|                             | Vacuole        | 0.026         |                 |
|                             | Nuclear        | 0.183         |                 |

**Table S1.** Subcellular localization of proteins retrieved for TriTypDB database showing >80% homology among *L. infantum*, *L. major* and *L. braziliensis*.

\*\*\*\*\*  
\*\*\*\*\*

SeqID: li|LinJ\_16\_0950\_mRNA|

CELLO prediction:

| (predictor  | location    | reliable-index) |
|-------------|-------------|-----------------|
| Composition | Cytoplasmic | 0.698           |
| Di-peptide  | Cytoplasmic | 0.749           |
| part-Comp.  | Cytoplasmic | 0.429           |
| chemo-typy  | Nuclear     | 0.446           |
| Neighboring | Cytoplasmic | 0.750           |

Combined SVM classifier:

|                |         |
|----------------|---------|
| Extracellular  | 0.227   |
| PlasmaMembrane | 0.124   |
| Cytoplasmic    | 3.034 * |
| Cytoskeletal   | 0.010   |
| ER             | 0.027   |
| Golgi          | 0.025   |
| Lysosomal      | 0.022   |
| Mitochondrial  | 0.565   |
| Chloroplast    | 0.144   |
| Peroxisomal    | 0.039   |
| Vacuole        | 0.009   |
| Nuclear        | 0.775   |

\*\*\*\*\*  
\*\*\*\*\*

SeqID: li|LinJ\_35\_2250\_mRNA|

CELLO prediction:

| (predictor  | location      | reliable-index) |
|-------------|---------------|-----------------|
| Composition | Nuclear       | 0.273           |
| Di-peptide  | Mitochondrial | 0.401           |
| part-Comp.  | Nuclear       | 0.554           |
| chemo-typy  | Nuclear       | 0.406           |
| Neighboring | Extracellular | 0.302           |

Combined SVM classifier:

|                |         |
|----------------|---------|
| Extracellular  | 0.673   |
| PlasmaMembrane | 0.070   |
| Cytoplasmic    | 1.243 * |
| Cytoskeletal   | 0.048   |
| ER             | 0.029   |
| Golgi          | 0.016   |
| Lysosomal      | 0.012   |
| Mitochondrial  | 0.827   |
| Chloroplast    | 0.269   |
| Peroxisomal    | 0.040   |
| Vacuole        | 0.020   |
| Nuclear        | 1.755 * |

\*\*\*\*\*  
\*\*\*\*\*

SeqID: li|LinJ\_30\_3060\_mRNA|

CELLO prediction:

| (predictor  | location    | reliable-index) |
|-------------|-------------|-----------------|
| Composition | Chloroplast | 0.379           |
| Di-peptide  | Cytoplasmic | 0.325           |
| part-Comp.  | Cytoplasmic | 0.473           |

**Table S1.** Subcellular localization of proteins retrieved for TriTypDB database showing >80% homology among *L. infantum*, *L. major* and *L. braziliensis*.

|                             |             |                |                 |       |
|-----------------------------|-------------|----------------|-----------------|-------|
|                             | chemo-typy  | Cytoplasmic    | 0.500           |       |
|                             | Neighboring | Chloroplast    | 0.470           |       |
| Combined SVM classifier:    |             |                |                 |       |
|                             |             | Extracellular  | 0.309           |       |
|                             |             | PlasmaMembrane | 0.072           |       |
|                             |             | Cytoplasmic    | 1.650           | *     |
|                             |             | Cytoskeletal   | 0.016           |       |
|                             |             | ER             | 0.073           |       |
|                             |             | Golgi          | 0.042           |       |
|                             |             | Lysosomal      |                 | 0.020 |
|                             |             | Mitochondrial  | 0.739           |       |
|                             |             | Chloroplast    | 1.389           | *     |
|                             |             | Peroxisomal    | 0.152           |       |
|                             |             | Vacuole        | 0.070           |       |
|                             |             | Nuclear        | 0.468           |       |
| *****                       |             |                |                 |       |
| *****                       |             |                |                 |       |
| SeqID: li LinJ_35_1900_mRNA |             |                |                 |       |
| CELLO prediction:           |             |                |                 |       |
|                             | (predictor  | location       | reliable-index) |       |
|                             | Composition | Cytoplasmic    | 0.722           |       |
|                             | Di-peptide  | Nuclear        | 0.581           |       |
|                             | part-Comp.  | Nuclear        | 0.355           |       |
|                             | chemo-typy  | Nuclear        | 0.917           |       |
|                             | Neighboring | Nuclear        | 0.318           |       |
| Combined SVM classifier:    |             |                |                 |       |
|                             |             | Extracellular  | 0.072           |       |
|                             |             | PlasmaMembrane | 0.026           |       |
|                             |             | Cytoplasmic    | 1.514           |       |
|                             |             | Cytoskeletal   | 0.020           |       |
|                             |             | ER             | 0.016           |       |
|                             |             | Golgi          | 0.009           |       |
|                             |             | Lysosomal      |                 | 0.010 |
|                             |             | Mitochondrial  | 0.829           |       |
|                             |             | Chloroplast    | 0.146           |       |
|                             |             | Peroxisomal    | 0.031           |       |
|                             |             | Vacuole        | 0.013           |       |
|                             |             | Nuclear        | 2.315           | *     |
| *****                       |             |                |                 |       |
| *****                       |             |                |                 |       |
| SeqID: li LinJ_22_1040_mRNA |             |                |                 |       |
| CELLO prediction:           |             |                |                 |       |
|                             | (predictor  | location       | reliable-index) |       |
|                             | Composition | Mitochondrial  | 0.706           |       |
|                             | Di-peptide  | Nuclear        | 0.548           |       |
|                             | part-Comp.  | Mitochondrial  | 0.903           |       |
|                             | chemo-typy  | Mitochondrial  | 0.582           |       |
|                             | Neighboring | Mitochondrial  | 0.828           |       |
| Combined SVM classifier:    |             |                |                 |       |
|                             |             | Extracellular  | 0.120           |       |
|                             |             | PlasmaMembrane | 0.022           |       |
|                             |             | Cytoplasmic    | 0.279           |       |
|                             |             | Cytoskeletal   | 0.008           |       |
|                             |             | ER             | 0.009           |       |



**Table S1.** Subcellular localization of proteins retrieved for TriTypDB database showing >80% homology among *L. infantum*, *L. major* and *L. braziliensis*.

|                             |                |                |                 |
|-----------------------------|----------------|----------------|-----------------|
|                             | Golgi          | 0.003          |                 |
|                             | Lysosomal      |                | 0.014           |
|                             | Mitochondrial  | 3.335          | *               |
|                             | Chloroplast    | 0.176          |                 |
|                             | Peroxisomal    | 0.055          |                 |
|                             | Vacuole        | 0.005          |                 |
|                             | Nuclear        | 0.975          |                 |
| *****                       |                |                |                 |
| *****                       |                |                |                 |
| SeqID: li LinJ_33_1560_mRNA |                |                |                 |
| CELLO prediction:           |                |                |                 |
|                             | (predictor     | location       | reliable-index) |
|                             | Composition    | Nuclear        | 0.551           |
|                             | Di-peptide     | Nuclear        | 0.439           |
|                             | part-Comp.     | Nuclear        | 0.344           |
|                             | chemo-typy     | Nuclear        | 0.694           |
|                             | Neighboring    | Nuclear        | 0.736           |
| Combined SVM classifier:    |                |                |                 |
|                             | Extracellular  | 0.251          |                 |
|                             | PlasmaMembrane | 0.207          |                 |
|                             | Cytoplasmic    | 0.660          |                 |
|                             | Cytoskeletal   | 0.043          |                 |
|                             | ER             | 0.024          |                 |
|                             | Golgi          | 0.017          |                 |
|                             | Lysosomal      |                | 0.023           |
|                             | Mitochondrial  | 0.749          |                 |
|                             | Chloroplast    | 0.118          |                 |
|                             | Peroxisomal    | 0.091          |                 |
|                             | Vacuole        | 0.054          |                 |
|                             | Nuclear        | 2.763          | *               |
| *****                       |                |                |                 |
| *****                       |                |                |                 |
| SeqID: li LinJ_36_0950_mRNA |                |                |                 |
| CELLO prediction:           |                |                |                 |
|                             | (predictor     | location       | reliable-index) |
|                             | Composition    | Nuclear        | 0.363           |
|                             | Di-peptide     | PlasmaMembrane | 0.317           |
|                             | part-Comp.     | Extracellular  | 0.318           |
|                             | chemo-typy     | Cytoplasmic    | 0.309           |
|                             | Neighboring    | Cytoplasmic    | 0.260           |
| Combined SVM classifier:    |                |                |                 |
|                             | Extracellular  | 0.855          |                 |
|                             | PlasmaMembrane | 0.948          |                 |
|                             | Cytoplasmic    | 0.985          | *               |
|                             | Cytoskeletal   | 0.022          |                 |
|                             | ER             | 0.064          |                 |
|                             | Golgi          | 0.144          |                 |
|                             | Lysosomal      |                | 0.042           |
|                             | Mitochondrial  | 0.312          |                 |
|                             | Chloroplast    | 0.509          |                 |
|                             | Peroxisomal    | 0.131          |                 |
|                             | Vacuole        | 0.042          |                 |
|                             | Nuclear        | 0.946          |                 |

**Table S1.** Subcellular localization of proteins retrieved for TriTypDB database showing >80% homology among *L. infantum*, *L. major* and *L. braziliensis*.

\*\*\*\*\*

\*\*\*\*\*

SeqID: li|LinJ\_26\_0840\_mRNA|

CELLO prediction:

| (predictor  | location      | reliable-index) |
|-------------|---------------|-----------------|
| Composition | Cytoplasmic   | 0.404           |
| Di-peptide  | Mitochondrial | 0.743           |
| part-Comp.  | Mitochondrial | 0.538           |
| chemo-typy  | Mitochondrial | 0.383           |
| Neighboring | Mitochondrial | 0.670           |

Combined SVM classifier:

|                |         |
|----------------|---------|
| Extracellular  | 0.159   |
| PlasmaMembrane | 0.040   |
| Cytoplasmic    | 1.402   |
| Cytoskeletal   | 0.010   |
| ER             | 0.012   |
| Golgi          | 0.008   |
| Lysosomal      | 0.015   |
| Mitochondrial  | 2.698 * |
| Chloroplast    | 0.182   |
| Peroxisomal    | 0.104   |
| Vacuole        | 0.011   |
| Nuclear        | 0.359   |

\*\*\*\*\*

\*\*\*\*\*

SeqID: li|LinJ\_30\_3650\_mRNA|

CELLO prediction:

| (predictor  | location    | reliable-index) |
|-------------|-------------|-----------------|
| Composition | Cytoplasmic | 0.360           |
| Di-peptide  | Chloroplast | 0.354           |
| part-Comp.  | Cytoplasmic | 0.877           |
| chemo-typy  | Cytoplasmic | 0.772           |
| Neighboring | Cytoplasmic | 0.432           |

Combined SVM classifier:

|                |         |
|----------------|---------|
| Extracellular  | 0.085   |
| PlasmaMembrane | 0.024   |
| Cytoplasmic    | 2.673 * |
| Cytoskeletal   | 0.014   |
| ER             | 0.014   |
| Golgi          | 0.009   |
| Lysosomal      | 0.016   |
| Mitochondrial  | 0.702   |
| Chloroplast    | 0.713   |
| Peroxisomal    | 0.054   |
| Vacuole        | 0.023   |
| Nuclear        | 0.674   |

\*\*\*\*\*

\*\*\*\*\*

SeqID: li|LinJ\_30\_3280\_mRNA|

CELLO prediction:

| (predictor  | location      | reliable-index) |
|-------------|---------------|-----------------|
| Composition | Mitochondrial | 0.456           |
| Di-peptide  | Mitochondrial | 0.453           |
| part-Comp.  | Mitochondrial | 0.605           |
| chemo-typy  | Mitochondrial | 0.625           |

**Table S1.** Subcellular localization of proteins retrieved for TriTypDB database showing >80% homology among *L. infantum*, *L. major* and *L. braziliensis*.

|                             |             |                |                 |       |
|-----------------------------|-------------|----------------|-----------------|-------|
|                             | Neighboring | Mitochondrial  | 0.484           |       |
| Combined SVM classifier:    |             |                |                 |       |
|                             |             | Extracellular  | 0.132           |       |
|                             |             | PlasmaMembrane | 0.037           |       |
|                             |             | Cytoplasmic    | 0.750           |       |
|                             |             | Cytoskeletal   | 0.018           |       |
|                             |             | ER             | 0.120           |       |
|                             |             | Golgi          | 0.020           |       |
|                             |             | Lysosomal      |                 | 0.056 |
|                             |             | Mitochondrial  | 2.623           | *     |
|                             |             | Chloroplast    | 0.469           |       |
|                             |             | Peroxisomal    | 0.044           |       |
|                             |             | Vacuole        | 0.029           |       |
|                             |             | Nuclear        | 0.702           |       |
| *****                       |             |                |                 |       |
| *****                       |             |                |                 |       |
| SeqID: li LinJ_17_1380_mRNA |             |                |                 |       |
| CELLO prediction:           |             |                |                 |       |
|                             | (predictor  | location       | reliable-index) |       |
|                             | Composition | Extracellular  | 0.333           |       |
|                             | Di-peptide  | Mitochondrial  | 0.424           |       |
|                             | part-Comp.  | Chloroplast    | 0.252           |       |
|                             | chemo-typy  | Mitochondrial  | 0.427           |       |
|                             | Neighboring | Chloroplast    | 0.360           |       |
| Combined SVM classifier:    |             |                |                 |       |
|                             |             | Extracellular  | 0.775           |       |
|                             |             | PlasmaMembrane | 0.642           |       |
|                             |             | Cytoplasmic    | 0.481           |       |
|                             |             | Cytoskeletal   | 0.025           |       |
|                             |             | ER             | 0.043           |       |
|                             |             | Golgi          | 0.019           |       |
|                             |             | Lysosomal      |                 | 0.050 |
|                             |             | Mitochondrial  | 1.357           | *     |
|                             |             | Chloroplast    | 1.108           | *     |
|                             |             | Peroxisomal    | 0.207           |       |
|                             |             | Vacuole        | 0.041           |       |
|                             |             | Nuclear        | 0.252           |       |
| *****                       |             |                |                 |       |
| *****                       |             |                |                 |       |
| SeqID: li LinJ_34_2100_mRNA |             |                |                 |       |
| CELLO prediction:           |             |                |                 |       |
|                             | (predictor  | location       | reliable-index) |       |
|                             | Composition | PlasmaMembrane | 0.479           |       |
|                             | Di-peptide  | Mitochondrial  | 0.233           |       |
|                             | part-Comp.  | Cytoplasmic    | 0.423           |       |
|                             | chemo-typy  | Mitochondrial  | 0.438           |       |
|                             | Neighboring | Nuclear        | 0.405           |       |
| Combined SVM classifier:    |             |                |                 |       |
|                             |             | Extracellular  | 0.147           |       |
|                             |             | PlasmaMembrane | 1.083           | *     |
|                             |             | Cytoplasmic    | 1.189           | *     |
|                             |             | Cytoskeletal   | 0.032           |       |
|                             |             | ER             | 0.031           |       |
|                             |             | Golgi          | 0.254           |       |

**Table S1.** Subcellular localization of proteins retrieved for TriTypDB database showing >80% homology among *L. infantum*, *L. major* and *L. braziliensis*.

|                             |                |                 |
|-----------------------------|----------------|-----------------|
|                             | Lysosomal      | 0.015           |
|                             | Mitochondrial  | 0.812           |
|                             | Chloroplast    | 0.362           |
|                             | Peroxisomal    | 0.063           |
|                             | Vacuole        | 0.016           |
|                             | Nuclear        | 0.996           |
| *****                       |                |                 |
| *****                       |                |                 |
| SeqID: li LinJ_13_1410_mRNA |                |                 |
| CELLO prediction:           |                |                 |
| (predictor                  | location       | reliable-index) |
| Composition                 | Cytoplasmic    | 0.647           |
| Di-peptide                  | Nuclear        | 0.726           |
| part-Comp.                  | Cytoplasmic    | 0.763           |
| chemo-typy                  | Nuclear        | 0.844           |
| Neighboring                 | Cytoplasmic    | 0.655           |
| Combined SVM classifier:    |                |                 |
|                             | Extracellular  | 0.145           |
|                             | PlasmaMembrane | 0.040           |
|                             | Cytoplasmic    | 2.233 *         |
|                             | Cytoskeletal   | 0.011           |
|                             | ER             | 0.024           |
|                             | Golgi          | 0.010           |
|                             | Lysosomal      | 0.013           |
|                             | Mitochondrial  | 0.550           |
|                             | Chloroplast    | 0.061           |
|                             | Peroxisomal    | 0.027           |
|                             | Vacuole        | 0.018           |
|                             | Nuclear        | 1.869 *         |
| *****                       |                |                 |
| *****                       |                |                 |
| SeqID: li LinJ_36_0370_mRNA |                |                 |
| CELLO prediction:           |                |                 |
| (predictor                  | location       | reliable-index) |
| Composition                 | Mitochondrial  | 0.367           |
| Di-peptide                  | Nuclear        | 0.755           |
| part-Comp.                  | Nuclear        | 0.573           |
| chemo-typy                  | Nuclear        | 0.508           |
| Neighboring                 | Mitochondrial  | 0.452           |
| Combined SVM classifier:    |                |                 |
|                             | Extracellular  | 0.156           |
|                             | PlasmaMembrane | 0.045           |
|                             | Cytoplasmic    | 0.911           |
|                             | Cytoskeletal   | 0.020           |
|                             | ER             | 0.017           |
|                             | Golgi          | 0.010           |
|                             | Lysosomal      | 0.010           |
|                             | Mitochondrial  | 1.306           |
|                             | Chloroplast    | 0.318           |
|                             | Peroxisomal    | 0.030           |
|                             | Vacuole        | 0.010           |
|                             | Nuclear        | 2.168 *         |

**Table S1.** Subcellular localization of proteins retrieved for TriTypDB database showing >80% homology among *L. infantum*, *L. major* and *L. braziliensis*.

|                             |             |                |                 |
|-----------------------------|-------------|----------------|-----------------|
| *****                       |             |                |                 |
| *****                       |             |                |                 |
| SeqID: li LinJ_36_1310_mRNA |             |                |                 |
| CELLO prediction:           |             |                |                 |
|                             | (predictor  | location       | reliable-index) |
|                             | Composition | Nuclear        | 0.635           |
|                             | Di-peptide  | Nuclear        | 0.646           |
|                             | part-Comp.  | Nuclear        | 0.665           |
|                             | chemo-typy  | Nuclear        | 0.816           |
|                             | Neighboring | Mitochondrial  | 0.511           |
|                             |             |                |                 |
| Combined SVM classifier:    |             |                |                 |
|                             |             | Extracellular  | 0.030           |
|                             |             | PlasmaMembrane | 0.032           |
|                             |             | Cytoplasmic    | 0.461           |
|                             |             | Cytoskeletal   | 0.014           |
|                             |             | ER             | 0.004           |
|                             |             | Golgi          | 0.005           |
|                             |             | Lysosomal      | 0.003           |
|                             |             | Mitochondrial  | 1.023           |
|                             |             | Chloroplast    | 0.178           |
|                             |             | Peroxisomal    | 0.036           |
|                             |             | Vacuole        | 0.004           |
|                             |             | Nuclear        | 3.209 *         |
|                             |             |                |                 |
| *****                       |             |                |                 |
| *****                       |             |                |                 |
| SeqID: li LinJ_35_1320_mRNA |             |                |                 |
| CELLO prediction:           |             |                |                 |
|                             | (predictor  | location       | reliable-index) |
|                             | Composition | Cytoplasmic    | 0.517           |
|                             | Di-peptide  | Nuclear        | 0.722           |
|                             | part-Comp.  | Nuclear        | 0.501           |
|                             | chemo-typy  | Nuclear        | 0.793           |
|                             | Neighboring | Nuclear        | 0.455           |
|                             |             |                |                 |
| Combined SVM classifier:    |             |                |                 |
|                             |             | Extracellular  | 0.108           |
|                             |             | PlasmaMembrane | 0.036           |
|                             |             | Cytoplasmic    | 1.013           |
|                             |             | Cytoskeletal   | 0.013           |
|                             |             | ER             | 0.013           |
|                             |             | Golgi          | 0.007           |
|                             |             | Lysosomal      | 0.008           |
|                             |             | Mitochondrial  | 0.907           |
|                             |             | Chloroplast    | 0.234           |
|                             |             | Peroxisomal    | 0.032           |
|                             |             | Vacuole        | 0.014           |
|                             |             | Nuclear        | 2.615 *         |
|                             |             |                |                 |
| *****                       |             |                |                 |
| *****                       |             |                |                 |
| SeqID: li LinJ_36_5350_mRNA |             |                |                 |
| CELLO prediction:           |             |                |                 |
|                             | (predictor  | location       | reliable-index) |
|                             | Composition | Mitochondrial  | 0.638           |
|                             | Di-peptide  | Cytoplasmic    | 0.400           |
|                             | part-Comp.  | Mitochondrial  | 0.449           |
|                             | chemo-typy  | Cytoplasmic    | 0.545           |

**Table S1.** Subcellular localization of proteins retrieved for TriTypDB database showing >80% homology among *L. infantum*, *L. major* and *L. braziliensis*.

|                             |             |                |                 |       |
|-----------------------------|-------------|----------------|-----------------|-------|
|                             | Neighboring | Cytoplasmic    | 0.527           |       |
| Combined SVM classifier:    |             |                |                 |       |
|                             |             | Extracellular  | 0.078           |       |
|                             |             | PlasmaMembrane | 0.083           |       |
|                             |             | Cytoplasmic    | 1.684           | *     |
|                             |             | Cytoskeletal   | 0.027           |       |
|                             |             | ER             | 0.024           |       |
|                             |             | Golgi          | 0.020           |       |
|                             |             | Lysosomal      |                 | 0.008 |
|                             |             | Mitochondrial  | 2.088           | *     |
|                             |             | Chloroplast    | 0.476           |       |
|                             |             | Peroxisomal    | 0.355           |       |
|                             |             | Vacuole        | 0.009           |       |
|                             |             | Nuclear        | 0.148           |       |
| *****                       |             |                |                 |       |
| *****                       |             |                |                 |       |
| SeqID: li LinJ_26_0540_mRNA |             |                |                 |       |
| CELLO prediction:           |             |                |                 |       |
|                             | (predictor  | location       | reliable-index) |       |
|                             | Composition | Extracellular  | 0.401           |       |
|                             | Di-peptide  | Extracellular  | 0.806           |       |
|                             | part-Comp.  | Extracellular  | 0.446           |       |
|                             | chemo-typy  | Chloroplast    | 0.258           |       |
|                             | Neighboring | Cytoplasmic    | 0.269           |       |
| Combined SVM classifier:    |             |                |                 |       |
|                             |             | Extracellular  | 2.103           | *     |
|                             |             | PlasmaMembrane | 0.313           |       |
|                             |             | Cytoplasmic    | 0.726           |       |
|                             |             | Cytoskeletal   | 0.015           |       |
|                             |             | ER             | 0.111           |       |
|                             |             | Golgi          | 0.080           |       |
|                             |             | Lysosomal      |                 | 0.075 |
|                             |             | Mitochondrial  | 0.195           |       |
|                             |             | Chloroplast    | 0.570           |       |
|                             |             | Peroxisomal    | 0.038           |       |
|                             |             | Vacuole        | 0.165           |       |
|                             |             | Nuclear        | 0.609           |       |
| *****                       |             |                |                 |       |
| *****                       |             |                |                 |       |
| SeqID: li LinJ_20_0600_mRNA |             |                |                 |       |
| CELLO prediction:           |             |                |                 |       |
|                             | (predictor  | location       | reliable-index) |       |
|                             | Composition | Mitochondrial  | 0.848           |       |
|                             | Di-peptide  | Mitochondrial  | 0.917           |       |
|                             | part-Comp.  | Mitochondrial  | 0.863           |       |
|                             | chemo-typy  | Mitochondrial  | 0.501           |       |
|                             | Neighboring | Mitochondrial  | 0.893           |       |
| Combined SVM classifier:    |             |                |                 |       |
|                             |             | Extracellular  | 0.109           |       |
|                             |             | PlasmaMembrane | 0.047           |       |
|                             |             | Cytoplasmic    | 0.334           |       |
|                             |             | Cytoskeletal   | 0.018           |       |
|                             |             | ER             | 0.010           |       |
|                             |             | Golgi          | 0.006           |       |

**Table S1.** Subcellular localization of proteins retrieved for TriTypDB database showing >80% homology among *L. infantum*, *L. major* and *L. braziliensis*.

|                             |                |                 |
|-----------------------------|----------------|-----------------|
|                             | Lysosomal      | 0.008           |
|                             | Mitochondrial  | 4.021 *         |
|                             | Chloroplast    | 0.181           |
|                             | Peroxisomal    | 0.050           |
|                             | Vacuole        | 0.007           |
|                             | Nuclear        | 0.209           |
| *****                       |                |                 |
| *****                       |                |                 |
| SeqID: li LinJ_29_2480_mRNA |                |                 |
| CELLO prediction:           |                |                 |
| (predictor                  | location       | reliable-index) |
| Composition                 | Nuclear        | 0.401           |
| Di-peptide                  | Mitochondrial  | 0.502           |
| part-Comp.                  | Nuclear        | 0.375           |
| chemo-typy                  | Mitochondrial  | 0.570           |
| Neighboring                 | Nuclear        | 0.311           |
| Combined SVM classifier:    |                |                 |
|                             | Extracellular  | 0.414           |
|                             | PlasmaMembrane | 0.109           |
|                             | Cytoplasmic    | 0.593           |
|                             | Cytoskeletal   | 0.015           |
|                             | ER             | 0.019           |
|                             | Golgi          | 0.011           |
|                             | Lysosomal      | 0.013           |
|                             | Mitochondrial  | 1.696 *         |
|                             | Chloroplast    | 0.328           |
|                             | Peroxisomal    | 0.026           |
|                             | Vacuole        | 0.016           |
|                             | Nuclear        | 1.760 *         |
| *****                       |                |                 |
| *****                       |                |                 |
| SeqID: li LinJ_32_4050_mRNA |                |                 |
| CELLO prediction:           |                |                 |
| (predictor                  | location       | reliable-index) |
| Composition                 | Mitochondrial  | 0.380           |
| Di-peptide                  | Cytoplasmic    | 0.721           |
| part-Comp.                  | Mitochondrial  | 0.419           |
| chemo-typy                  | Nuclear        | 0.377           |
| Neighboring                 | Mitochondrial  | 0.558           |
| Combined SVM classifier:    |                |                 |
|                             | Extracellular  | 0.045           |
|                             | PlasmaMembrane | 0.025           |
|                             | Cytoplasmic    | 1.850 *         |
|                             | Cytoskeletal   | 0.010           |
|                             | ER             | 0.016           |
|                             | Golgi          | 0.008           |
|                             | Lysosomal      | 0.011           |
|                             | Mitochondrial  | 1.666 *         |
|                             | Chloroplast    | 0.134           |
|                             | Peroxisomal    | 0.086           |
|                             | Vacuole        | 0.006           |
|                             | Nuclear        | 1.142           |

**Table S1.** Subcellular localization of proteins retrieved for TriTypDB database showing >80% homology among *L. infantum*, *L. major* and *L. braziliensis*.

```

*****
*****
SeqID: li|LinJ_25_0260_mRNA|
      CELLO prediction:
              (predictor      location      reliable-index)
Composition      Extracellular  0.399
Di-peptide       Cytoplasmic   0.612
part-Comp.       Cytoplasmic   0.510
chemo-typy       Cytoplasmic   0.531
Neighboring      Cytoplasmic   0.507

      Combined SVM classifier:
                                Extracellular  0.479
                                PlasmaMembrane 0.045
                                Cytoplasmic     2.547 *
                                Cytoskeletal    0.023
                                ER               0.037
                                Golgi           0.016
                                Lysosomal              0.011
                                Mitochondrial    0.794
                                Chloroplast      0.197
                                Peroxisomal      0.213
                                Vacuole          0.006
                                Nuclear           0.632

*****
*****
SeqID: li|LinJ_34_0420_mRNA|
      CELLO prediction:
              (predictor      location      reliable-index)
Composition      Mitochondrial  0.247
Di-peptide       Mitochondrial  0.448
part-Comp.       Mitochondrial  0.499
chemo-typy       Extracellular  0.316
Neighboring      Mitochondrial  0.468

      Combined SVM classifier:
                                Extracellular  0.541
                                PlasmaMembrane 0.117
                                Cytoplasmic     0.712
                                Cytoskeletal    0.164
                                ER               0.065
                                Golgi           0.042
                                Lysosomal              0.029
                                Mitochondrial    1.943 *
                                Chloroplast      0.631
                                Peroxisomal      0.087
                                Vacuole          0.042
                                Nuclear           0.626

*****
*****
SeqID: li|LinJ_04_0680_mRNA|
      CELLO prediction:
              (predictor      location      reliable-index)
Composition      Nuclear        0.516
Di-peptide       Nuclear        0.288
part-Comp.       Nuclear        0.409
chemo-typy       Mitochondrial  0.467

```



**Table S1.** Subcellular localization of proteins retrieved for TriTypDB database showing >80% homology among *L. infantum*, *L. major* and *L. braziliensis*.

|                             |             |                |                 |       |
|-----------------------------|-------------|----------------|-----------------|-------|
|                             | Neighboring | Nuclear        | 0.781           |       |
| Combined SVM classifier:    |             |                |                 |       |
|                             |             | Extracellular  | 0.333           |       |
|                             |             | PlasmaMembrane | 0.088           |       |
|                             |             | Cytoplasmic    | 0.896           |       |
|                             |             | Cytoskeletal   | 0.022           |       |
|                             |             | ER             | 0.017           |       |
|                             |             | Golgi          | 0.013           |       |
|                             |             | Lysosomal      |                 | 0.011 |
|                             |             | Mitochondrial  | 1.165           |       |
|                             |             | Chloroplast    | 0.241           |       |
|                             |             | Peroxisomal    | 0.058           |       |
|                             |             | Vacuole        | 0.008           |       |
|                             |             | Nuclear        | 2.148           | *     |
| *****                       |             |                |                 |       |
| *****                       |             |                |                 |       |
| SeqID: li LinJ_28_0260_mRNA |             |                |                 |       |
| CELLO prediction:           |             |                |                 |       |
|                             | (predictor  | location       | reliable-index) |       |
|                             | Composition | Mitochondrial  | 0.832           |       |
|                             | Di-peptide  | Mitochondrial  | 0.758           |       |
|                             | part-Comp.  | Mitochondrial  | 0.364           |       |
|                             | chemo-typy  | Cytoplasmic    | 0.440           |       |
|                             | Neighboring | Mitochondrial  | 0.876           |       |
| Combined SVM classifier:    |             |                |                 |       |
|                             |             | Extracellular  | 0.215           |       |
|                             |             | PlasmaMembrane | 0.048           |       |
|                             |             | Cytoplasmic    | 0.936           |       |
|                             |             | Cytoskeletal   | 0.015           |       |
|                             |             | ER             | 0.029           |       |
|                             |             | Golgi          | 0.014           |       |
|                             |             | Lysosomal      |                 | 0.011 |
|                             |             | Mitochondrial  | 2.932           | *     |
|                             |             | Chloroplast    | 0.386           |       |
|                             |             | Peroxisomal    | 0.243           |       |
|                             |             | Vacuole        | 0.021           |       |
|                             |             | Nuclear        | 0.148           |       |
| *****                       |             |                |                 |       |
| *****                       |             |                |                 |       |
| SeqID: li LinJ_06_1210_mRNA |             |                |                 |       |
| CELLO prediction:           |             |                |                 |       |
|                             | (predictor  | location       | reliable-index) |       |
|                             | Composition | Nuclear        | 0.490           |       |
|                             | Di-peptide  | Cytoplasmic    | 0.333           |       |
|                             | part-Comp.  | Nuclear        | 0.918           |       |
|                             | chemo-typy  | Cytoplasmic    | 0.388           |       |
|                             | Neighboring | Nuclear        | 0.398           |       |
| Combined SVM classifier:    |             |                |                 |       |
|                             |             | Extracellular  | 0.290           |       |
|                             |             | PlasmaMembrane | 0.035           |       |
|                             |             | Cytoplasmic    | 1.176           |       |
|                             |             | Cytoskeletal   | 0.023           |       |
|                             |             | ER             | 0.053           |       |
|                             |             | Golgi          | 0.017           |       |

**Table S1.** Subcellular localization of proteins retrieved for TriTypDB database showing >80% homology among *L. infantum*, *L. major* and *L. braziliensis*.

|                             |                |                 |
|-----------------------------|----------------|-----------------|
|                             | Lysosomal      | 0.036           |
|                             | Mitochondrial  | 0.734           |
|                             | Chloroplast    | 0.344           |
|                             | Peroxisomal    | 0.179           |
|                             | Vacuole        | 0.032           |
|                             | Nuclear        | 2.082 *         |
| *****                       |                |                 |
| *****                       |                |                 |
| SeqID: li LinJ_24_2300_mRNA |                |                 |
| CELLO prediction:           |                |                 |
| (predictor                  | location       | reliable-index) |
| Composition                 | Mitochondrial  | 0.416           |
| Di-peptide                  | Chloroplast    | 0.403           |
| part-Comp.                  | Mitochondrial  | 0.448           |
| chemo-typy                  | Extracellular  | 0.535           |
| Neighboring                 | Cytoplasmic    | 0.448           |
| Combined SVM classifier:    |                |                 |
|                             | Extracellular  | 0.631           |
|                             | PlasmaMembrane | 0.027           |
|                             | Cytoplasmic    | 1.379 *         |
|                             | Cytoskeletal   | 0.014           |
|                             | ER             | 0.023           |
|                             | Golgi          | 0.014           |
|                             | Lysosomal      | 0.013           |
|                             | Mitochondrial  | 1.401 *         |
|                             | Chloroplast    | 0.901           |
|                             | Peroxisomal    | 0.122           |
|                             | Vacuole        | 0.017           |
|                             | Nuclear        | 0.457           |
| *****                       |                |                 |
| *****                       |                |                 |
| SeqID: li LinJ_16_0150_mRNA |                |                 |
| CELLO prediction:           |                |                 |
| (predictor                  | location       | reliable-index) |
| Composition                 | Nuclear        | 0.770           |
| Di-peptide                  | Cytoplasmic    | 0.515           |
| part-Comp.                  | Nuclear        | 0.620           |
| chemo-typy                  | Chloroplast    | 0.388           |
| Neighboring                 | Cytoplasmic    | 0.302           |
| Combined SVM classifier:    |                |                 |
|                             | Extracellular  | 0.060           |
|                             | PlasmaMembrane | 0.029           |
|                             | Cytoplasmic    | 1.063           |
|                             | Cytoskeletal   | 0.030           |
|                             | ER             | 0.052           |
|                             | Golgi          | 0.016           |
|                             | Lysosomal      | 0.007           |
|                             | Mitochondrial  | 0.367           |
|                             | Chloroplast    | 0.847           |
|                             | Peroxisomal    | 0.052           |
|                             | Vacuole        | 0.051           |
|                             | Nuclear        | 2.427 *         |

**Table S1.** Subcellular localization of proteins retrieved for TriTypDB database showing >80% homology among *L. infantum*, *L. major* and *L. braziliensis*.

```

*****
*****
SeqID: li|LinJ_35_1030_mRNA|
      CELLO prediction:
              (predictor      location      reliable-index)
Composition      Cytoplasmic      0.423
Di-peptide       Cytoplasmic      0.562
part-Comp.       Cytoplasmic      0.559
chemo-typy       Cytoplasmic      0.493
Neighboring      Mitochondrial    0.504

      Combined SVM classifier:
                                Extracellular  0.056
                                PlasmaMembrane 0.083
                                Cytoplasmic     2.390 *
                                Cytoskeletal    0.014
                                ER               0.043
                                Golgi           0.008
                                Lysosomal       0.036
                                Mitochondrial   0.995
                                Chloroplast     0.091
                                Peroxisomal     0.078
                                Vacuole         0.045
                                Nuclear          1.160

*****
*****
SeqID: li|LinJ_25_0990_mRNA|
      CELLO prediction:
              (predictor      location      reliable-index)
Composition      Nuclear          0.420
Di-peptide       PlasmaMembrane 0.194
part-Comp.       Nuclear          0.414
chemo-typy       Cytoplasmic     0.469
Neighboring      Nuclear          0.313

      Combined SVM classifier:
                                Extracellular  0.305
                                PlasmaMembrane 0.550
                                Cytoplasmic     1.461 *
                                Cytoskeletal    0.014
                                ER               0.067
                                Golgi           0.037
                                Lysosomal       0.132
                                Mitochondrial   0.416
                                Chloroplast     0.235
                                Peroxisomal     0.105
                                Vacuole         0.094
                                Nuclear          1.583 *

*****
*****
SeqID: li|LinJ_36_3520_mRNA|
      CELLO prediction:
              (predictor      location      reliable-index)
Composition      Nuclear          0.857
Di-peptide       Nuclear          0.493
part-Comp.       Nuclear          0.610
chemo-typy       Cytoplasmic     0.383

```

**Table S1.** Subcellular localization of proteins retrieved for TriTypDB database showing >80% homology among *L. infantum*, *L. major* and *L. braziliensis*.

|                             |             |                |                 |       |
|-----------------------------|-------------|----------------|-----------------|-------|
|                             | Neighboring | Cytoplasmic    | 0.506           |       |
| Combined SVM classifier:    |             |                |                 |       |
|                             |             | Extracellular  | 0.147           |       |
|                             |             | PlasmaMembrane | 0.049           |       |
|                             |             | Cytoplasmic    | 1.382           |       |
|                             |             | Cytoskeletal   | 0.041           |       |
|                             |             | ER             | 0.024           |       |
|                             |             | Golgi          | 0.049           |       |
|                             |             | Lysosomal      |                 | 0.009 |
|                             |             | Mitochondrial  | 0.251           |       |
|                             |             | Chloroplast    | 0.303           |       |
|                             |             | Peroxisomal    | 0.142           |       |
|                             |             | Vacuole        | 0.025           |       |
|                             |             | Nuclear        | 2.579           | *     |
| *****                       |             |                |                 |       |
| *****                       |             |                |                 |       |
| SeqID: li LinJ_01_0790_mRNA |             |                |                 |       |
| CELLO prediction:           |             |                |                 |       |
|                             | (predictor  | location       | reliable-index) |       |
|                             | Composition | Cytoplasmic    | 0.282           |       |
|                             | Di-peptide  | Chloroplast    | 0.720           |       |
|                             | part-Comp.  | Nuclear        | 0.426           |       |
|                             | chemo-typy  | Cytoplasmic    | 0.818           |       |
|                             | Neighboring | Nuclear        | 0.288           |       |
| Combined SVM classifier:    |             |                |                 |       |
|                             |             | Extracellular  | 0.030           |       |
|                             |             | PlasmaMembrane | 0.192           |       |
|                             |             | Cytoplasmic    | 1.805           | *     |
|                             |             | Cytoskeletal   | 0.029           |       |
|                             |             | ER             | 0.054           |       |
|                             |             | Golgi          | 0.039           |       |
|                             |             | Lysosomal      |                 | 0.010 |
|                             |             | Mitochondrial  | 0.676           |       |
|                             |             | Chloroplast    | 1.031           |       |
|                             |             | Peroxisomal    | 0.110           |       |
|                             |             | Vacuole        | 0.023           |       |
|                             |             | Nuclear        | 1.003           |       |
| *****                       |             |                |                 |       |
| *****                       |             |                |                 |       |
| SeqID: li LinJ_22_0140_mRNA |             |                |                 |       |
| CELLO prediction:           |             |                |                 |       |
|                             | (predictor  | location       | reliable-index) |       |
|                             | Composition | Extracellular  | 0.697           |       |
|                             | Di-peptide  | Mitochondrial  | 0.492           |       |
|                             | part-Comp.  | Nuclear        | 0.817           |       |
|                             | chemo-typy  | Nuclear        | 0.361           |       |
|                             | Neighboring | Nuclear        | 0.763           |       |
| Combined SVM classifier:    |             |                |                 |       |
|                             |             | Extracellular  | 0.815           |       |
|                             |             | PlasmaMembrane | 0.027           |       |
|                             |             | Cytoplasmic    | 0.757           |       |
|                             |             | Cytoskeletal   | 0.015           |       |
|                             |             | ER             | 0.015           |       |
|                             |             | Golgi          | 0.009           |       |

**Table S1.** Subcellular localization of proteins retrieved for TriTypDB database showing >80% homology among *L. infantum*, *L. major* and *L. braziliensis*.

|                             |                |                 |
|-----------------------------|----------------|-----------------|
|                             | Lysosomal      | 0.012           |
|                             | Mitochondrial  | 0.889           |
|                             | Chloroplast    | 0.166           |
|                             | Peroxisomal    | 0.011           |
|                             | Vacuole        | 0.008           |
|                             | Nuclear        | 2.275 *         |
| *****                       |                |                 |
| *****                       |                |                 |
| SeqID: li LinJ_09_1190_mRNA |                |                 |
| CELLO prediction:           |                |                 |
| (predictor                  | location       | reliable-index) |
| Composition                 | PlasmaMembrane | 0.386           |
| Di-peptide                  | Mitochondrial  | 0.517           |
| part-Comp.                  | PlasmaMembrane | 0.561           |
| chemo-typy                  | PlasmaMembrane | 0.693           |
| Neighboring                 | Mitochondrial  | 0.358           |
| Combined SVM classifier:    |                |                 |
|                             | Extracellular  | 0.142           |
|                             | PlasmaMembrane | 2.258 *         |
|                             | Cytoplasmic    | 0.262           |
|                             | Cytoskeletal   | 0.013           |
|                             | ER             | 0.036           |
|                             | Golgi          | 0.013           |
|                             | Lysosomal      | 0.033           |
|                             | Mitochondrial  | 1.386           |
|                             | Chloroplast    | 0.565           |
|                             | Peroxisomal    | 0.107           |
|                             | Vacuole        | 0.051           |
|                             | Nuclear        | 0.133           |
| *****                       |                |                 |
| *****                       |                |                 |
| SeqID: li LinJ_34_4150_mRNA |                |                 |
| CELLO prediction:           |                |                 |
| (predictor                  | location       | reliable-index) |
| Composition                 | Mitochondrial  | 0.319           |
| Di-peptide                  | Mitochondrial  | 0.461           |
| part-Comp.                  | Mitochondrial  | 0.445           |
| chemo-typy                  | Mitochondrial  | 0.463           |
| Neighboring                 | Mitochondrial  | 0.447           |
| Combined SVM classifier:    |                |                 |
|                             | Extracellular  | 0.269           |
|                             | PlasmaMembrane | 0.186           |
|                             | Cytoplasmic    | 0.696           |
|                             | Cytoskeletal   | 0.021           |
|                             | ER             | 0.020           |
|                             | Golgi          | 0.012           |
|                             | Lysosomal      | 0.029           |
|                             | Mitochondrial  | 2.135 *         |
|                             | Chloroplast    | 0.651           |
|                             | Peroxisomal    | 0.080           |
|                             | Vacuole        | 0.021           |
|                             | Nuclear        | 0.881           |

**Table S1.** Subcellular localization of proteins retrieved for TriTypDB database showing >80% homology among *L. infantum*, *L. major* and *L. braziliensis*.

|                             |             |                |                 |
|-----------------------------|-------------|----------------|-----------------|
| *****                       |             |                |                 |
| *****                       |             |                |                 |
| SeqID: li LinJ_21_0930_mRNA |             |                |                 |
| CELLO prediction:           |             |                |                 |
|                             | (predictor  | location       | reliable-index) |
|                             | Composition | Nuclear        | 0.528           |
|                             | Di-peptide  | Mitochondrial  | 0.367           |
|                             | part-Comp.  | Nuclear        | 0.799           |
|                             | chemo-typy  | Nuclear        | 0.782           |
|                             | Neighboring | Extracellular  | 0.353           |
|                             |             |                |                 |
| Combined SVM classifier:    |             |                |                 |
|                             |             | Extracellular  | 0.868           |
|                             |             | PlasmaMembrane | 0.012           |
|                             |             | Cytoplasmic    | 0.352           |
|                             |             | Cytoskeletal   | 0.011           |
|                             |             | ER             | 0.013           |
|                             |             | Golgi          | 0.006           |
|                             |             | Lysosomal      | 0.038           |
|                             |             | Mitochondrial  | 0.861           |
|                             |             | Chloroplast    | 0.034           |
|                             |             | Peroxisomal    | 0.054           |
|                             |             | Vacuole        | 0.037           |
|                             |             | Nuclear        | 2.713 *         |
|                             |             |                |                 |
| *****                       |             |                |                 |
| *****                       |             |                |                 |
| SeqID: li LinJ_13_1120_mRNA |             |                |                 |
| CELLO prediction:           |             |                |                 |
|                             | (predictor  | location       | reliable-index) |
|                             | Composition | Mitochondrial  | 0.611           |
|                             | Di-peptide  | Mitochondrial  | 0.540           |
|                             | part-Comp.  | Cytoplasmic    | 0.545           |
|                             | chemo-typy  | Mitochondrial  | 0.676           |
|                             | Neighboring | Cytoplasmic    | 0.496           |
|                             |             |                |                 |
| Combined SVM classifier:    |             |                |                 |
|                             |             | Extracellular  | 0.039           |
|                             |             | PlasmaMembrane | 0.011           |
|                             |             | Cytoplasmic    | 1.891 *         |
|                             |             | Cytoskeletal   | 0.065           |
|                             |             | ER             | 0.012           |
|                             |             | Golgi          | 0.007           |
|                             |             | Lysosomal      | 0.006           |
|                             |             | Mitochondrial  | 2.489 *         |
|                             |             | Chloroplast    | 0.130           |
|                             |             | Peroxisomal    | 0.151           |
|                             |             | Vacuole        | 0.007           |
|                             |             | Nuclear        | 0.193           |
|                             |             |                |                 |
| *****                       |             |                |                 |
| *****                       |             |                |                 |
| SeqID: li LinJ_36_1000_mRNA |             |                |                 |
| CELLO prediction:           |             |                |                 |
|                             | (predictor  | location       | reliable-index) |
|                             | Composition | Nuclear        | 0.332           |
|                             | Di-peptide  | Mitochondrial  | 0.479           |
|                             | part-Comp.  | Cytoplasmic    | 0.485           |
|                             | chemo-typy  | Cytoplasmic    | 0.543           |

**Table S1.** Subcellular localization of proteins retrieved for TriTypDB database showing >80% homology among *L. infantum*, *L. major* and *L. braziliensis*.

|                             |             |                |                 |       |
|-----------------------------|-------------|----------------|-----------------|-------|
|                             | Neighboring | Mitochondrial  | 0.400           |       |
| Combined SVM classifier:    |             |                |                 |       |
|                             |             | Extracellular  | 0.086           |       |
|                             |             | PlasmaMembrane | 0.020           |       |
|                             |             | Cytoplasmic    | 1.868           | *     |
|                             |             | Cytoskeletal   | 0.038           |       |
|                             |             | ER             | 0.016           |       |
|                             |             | Golgi          | 0.009           |       |
|                             |             | Lysosomal      |                 | 0.008 |
|                             |             | Mitochondrial  | 1.679           | *     |
|                             |             | Chloroplast    | 0.246           |       |
|                             |             | Peroxisomal    | 0.094           |       |
|                             |             | Vacuole        | 0.008           |       |
|                             |             | Nuclear        | 0.927           |       |
| *****                       |             |                |                 |       |
| *****                       |             |                |                 |       |
| SeqID: li LinJ_21_1320_mRNA |             |                |                 |       |
| CELLO prediction:           |             |                |                 |       |
|                             | (predictor  | location       | reliable-index) |       |
|                             | Composition | Cytoplasmic    | 0.434           |       |
|                             | Di-peptide  | Cytoplasmic    | 0.455           |       |
|                             | part-Comp.  | Nuclear        | 0.449           |       |
|                             | chemo-typy  | Cytoplasmic    | 0.672           |       |
|                             | Neighboring | Mitochondrial  | 0.403           |       |
| Combined SVM classifier:    |             |                |                 |       |
|                             |             | Extracellular  | 0.403           |       |
|                             |             | PlasmaMembrane | 0.143           |       |
|                             |             | Cytoplasmic    | 2.199           | *     |
|                             |             | Cytoskeletal   | 0.010           |       |
|                             |             | ER             | 0.038           |       |
|                             |             | Golgi          | 0.028           |       |
|                             |             | Lysosomal      |                 | 0.023 |
|                             |             | Mitochondrial  | 0.779           |       |
|                             |             | Chloroplast    | 0.110           |       |
|                             |             | Peroxisomal    | 0.108           |       |
|                             |             | Vacuole        | 0.018           |       |
|                             |             | Nuclear        | 1.141           |       |
| *****                       |             |                |                 |       |
| *****                       |             |                |                 |       |
| SeqID: li LinJ_28_2280_mRNA |             |                |                 |       |
| CELLO prediction:           |             |                |                 |       |
|                             | (predictor  | location       | reliable-index) |       |
|                             | Composition | Cytoplasmic    | 0.300           |       |
|                             | Di-peptide  | Mitochondrial  | 0.354           |       |
|                             | part-Comp.  | Cytoplasmic    | 0.285           |       |
|                             | chemo-typy  | Nuclear        | 0.279           |       |
|                             | Neighboring | Cytoplasmic    | 0.372           |       |
| Combined SVM classifier:    |             |                |                 |       |
|                             |             | Extracellular  | 0.485           |       |
|                             |             | PlasmaMembrane | 0.179           |       |
|                             |             | Cytoplasmic    | 1.390           | *     |
|                             |             | Cytoskeletal   | 0.017           |       |
|                             |             | ER             | 0.044           |       |
|                             |             | Golgi          | 0.021           |       |

**Table S1.** Subcellular localization of proteins retrieved for TriTypDB database showing >80% homology among *L. infantum*, *L. major* and *L. braziliensis*.

|                             |                |                 |
|-----------------------------|----------------|-----------------|
|                             | Lysosomal      | 0.041           |
|                             | Mitochondrial  | 1.290 *         |
|                             | Chloroplast    | 0.788           |
|                             | Peroxisomal    | 0.097           |
|                             | Vacuole        | 0.038           |
|                             | Nuclear        | 0.608           |
| *****                       |                |                 |
| *****                       |                |                 |
| SeqID: li LinJ_21_2190_mRNA |                |                 |
| CELLO prediction:           |                |                 |
| (predictor                  | location       | reliable-index) |
| Composition                 | Cytoplasmic    | 0.328           |
| Di-peptide                  | Mitochondrial  | 0.514           |
| part-Comp.                  | Nuclear        | 0.356           |
| chemo-typy                  | Nuclear        | 0.533           |
| Neighboring                 | Nuclear        | 0.285           |
| Combined SVM classifier:    |                |                 |
|                             | Extracellular  | 0.228           |
|                             | PlasmaMembrane | 0.075           |
|                             | Cytoplasmic    | 0.717           |
|                             | Cytoskeletal   | 0.014           |
|                             | ER             | 0.014           |
|                             | Golgi          | 0.008           |
|                             | Lysosomal      | 0.019           |
|                             | Mitochondrial  | 1.827 *         |
|                             | Chloroplast    | 0.309           |
|                             | Peroxisomal    | 0.065           |
|                             | Vacuole        | 0.021           |
|                             | Nuclear        | 1.703 *         |
| *****                       |                |                 |
| *****                       |                |                 |
| SeqID: li LinJ_28_2940_mRNA |                |                 |
| CELLO prediction:           |                |                 |
| (predictor                  | location       | reliable-index) |
| Composition                 | Extracellular  | 0.598           |
| Di-peptide                  | Extracellular  | 0.640           |
| part-Comp.                  | Cytoplasmic    | 0.347           |
| chemo-typy                  | Chloroplast    | 0.524           |
| Neighboring                 | Cytoplasmic    | 0.307           |
| Combined SVM classifier:    |                |                 |
|                             | Extracellular  | 1.645 *         |
|                             | PlasmaMembrane | 0.219           |
|                             | Cytoplasmic    | 0.989           |
|                             | Cytoskeletal   | 0.013           |
|                             | ER             | 0.026           |
|                             | Golgi          | 0.047           |
|                             | Lysosomal      | 0.221           |
|                             | Mitochondrial  | 0.414           |
|                             | Chloroplast    | 0.877           |
|                             | Peroxisomal    | 0.121           |
|                             | Vacuole        | 0.079           |
|                             | Nuclear        | 0.348           |



**Table S1.** Subcellular localization of proteins retrieved for TriTypDB database showing >80% homology among *L. infantum*, *L. major* and *L. braziliensis*.

\*\*\*\*\*

\*\*\*\*\*

SeqID: li|LinJ\_14\_1350\_mRNA|

CELLO prediction:

| (predictor  | location      | reliable-index) |
|-------------|---------------|-----------------|
| Composition | Cytoplasmic   | 0.662           |
| Di-peptide  | Cytoplasmic   | 0.472           |
| part-Comp.  | Nuclear       | 0.353           |
| chemo-typy  | Extracellular | 0.363           |
| Neighboring | Nuclear       | 0.440           |

Combined SVM classifier:

|                |         |
|----------------|---------|
| Extracellular  | 0.633   |
| PlasmaMembrane | 0.014   |
| Cytoplasmic    | 1.534 * |
| Cytoskeletal   | 0.009   |
| ER             | 0.042   |
| Golgi          | 0.006   |
| Lysosomal      | 0.009   |
| Mitochondrial  | 0.756   |
| Chloroplast    | 0.190   |
| Peroxisomal    | 0.040   |
| Vacuole        | 0.036   |
| Nuclear        | 1.732 * |

\*\*\*\*\*

\*\*\*\*\*

SeqID: li|LinJ\_11\_0960\_mRNA|

CELLO prediction:

| (predictor  | location      | reliable-index) |
|-------------|---------------|-----------------|
| Composition | Nuclear       | 0.438           |
| Di-peptide  | Nuclear       | 0.599           |
| part-Comp.  | Mitochondrial | 0.881           |
| chemo-typy  | Cytoplasmic   | 0.600           |
| Neighboring | Mitochondrial | 0.473           |

Combined SVM classifier:

|                |         |
|----------------|---------|
| Extracellular  | 0.024   |
| PlasmaMembrane | 0.011   |
| Cytoplasmic    | 0.882   |
| Cytoskeletal   | 0.015   |
| ER             | 0.015   |
| Golgi          | 0.007   |
| Lysosomal      | 0.006   |
| Mitochondrial  | 2.170 * |
| Chloroplast    | 0.413   |
| Peroxisomal    | 0.052   |
| Vacuole        | 0.007   |
| Nuclear        | 1.397   |

\*\*\*\*\*

\*\*\*\*\*

SeqID: li|LinJ\_28\_2200\_mRNA|

CELLO prediction:

| (predictor  | location    | reliable-index) |
|-------------|-------------|-----------------|
| Composition | Nuclear     | 0.577           |
| Di-peptide  | Nuclear     | 0.429           |
| part-Comp.  | Nuclear     | 0.877           |
| chemo-typy  | Cytoplasmic | 0.682           |

**Table S1.** Subcellular localization of proteins retrieved for TriTypDB database showing >80% homology among *L. infantum*, *L. major* and *L. braziliensis*.

|                             |             |                |                 |       |
|-----------------------------|-------------|----------------|-----------------|-------|
|                             | Neighboring | Cytoplasmic    | 0.446           |       |
| Combined SVM classifier:    |             |                |                 |       |
|                             |             | Extracellular  | 0.225           |       |
|                             |             | PlasmaMembrane | 0.027           |       |
|                             |             | Cytoplasmic    | 1.658           |       |
|                             |             | Cytoskeletal   | 0.030           |       |
|                             |             | ER             | 0.022           |       |
|                             |             | Golgi          | 0.144           |       |
|                             |             | Lysosomal      |                 | 0.008 |
|                             |             | Mitochondrial  | 0.156           |       |
|                             |             | Chloroplast    | 0.269           |       |
|                             |             | Peroxisomal    | 0.048           |       |
|                             |             | Vacuole        | 0.010           |       |
|                             |             | Nuclear        | 2.402           | *     |
| *****                       |             |                |                 |       |
| *****                       |             |                |                 |       |
| SeqID: li LinJ_34_4050_mRNA |             |                |                 |       |
| CELLO prediction:           |             |                |                 |       |
|                             | (predictor  | location       | reliable-index) |       |
|                             | Composition | Nuclear        | 0.688           |       |
|                             | Di-peptide  | Cytoplasmic    | 0.521           |       |
|                             | part-Comp.  | Mitochondrial  | 0.436           |       |
|                             | chemo-typy  | Mitochondrial  | 0.516           |       |
|                             | Neighboring | Cytoplasmic    | 0.538           |       |
| Combined SVM classifier:    |             |                |                 |       |
|                             |             | Extracellular  | 0.463           |       |
|                             |             | PlasmaMembrane | 0.008           |       |
|                             |             | Cytoplasmic    | 1.363           | *     |
|                             |             | Cytoskeletal   | 0.022           |       |
|                             |             | ER             | 0.042           |       |
|                             |             | Golgi          | 0.007           |       |
|                             |             | Lysosomal      |                 | 0.005 |
|                             |             | Mitochondrial  | 1.449           | *     |
|                             |             | Chloroplast    | 0.024           |       |
|                             |             | Peroxisomal    | 0.043           |       |
|                             |             | Vacuole        | 0.005           |       |
|                             |             | Nuclear        | 1.568           | *     |
| *****                       |             |                |                 |       |
| *****                       |             |                |                 |       |
| SeqID: li LinJ_21_1990_mRNA |             |                |                 |       |
| CELLO prediction:           |             |                |                 |       |
|                             | (predictor  | location       | reliable-index) |       |
|                             | Composition | Nuclear        | 0.311           |       |
|                             | Di-peptide  | Cytoplasmic    | 0.695           |       |
|                             | part-Comp.  | Cytoplasmic    | 0.645           |       |
|                             | chemo-typy  | Cytoplasmic    | 0.686           |       |
|                             | Neighboring | Cytoplasmic    | 0.437           |       |
| Combined SVM classifier:    |             |                |                 |       |
|                             |             | Extracellular  | 0.168           |       |
|                             |             | PlasmaMembrane | 0.191           |       |
|                             |             | Cytoplasmic    | 2.604           | *     |
|                             |             | Cytoskeletal   | 0.020           |       |
|                             |             | ER             | 0.058           |       |
|                             |             | Golgi          | 0.167           |       |

**Table S1.** Subcellular localization of proteins retrieved for TriTypDB database showing >80% homology among *L. infantum*, *L. major* and *L. braziliensis*.

|                             |                |                 |
|-----------------------------|----------------|-----------------|
|                             | Lysosomal      | 0.011           |
|                             | Mitochondrial  | 0.417           |
|                             | Chloroplast    | 0.372           |
|                             | Peroxisomal    | 0.102           |
|                             | Vacuole        | 0.185           |
|                             | Nuclear        | 0.705           |
| *****                       |                |                 |
| *****                       |                |                 |
| SeqID: li LinJ_34_3620_mRNA |                |                 |
| CELLO prediction:           |                |                 |
| (predictor                  | location       | reliable-index) |
| Composition                 | Extracellular  | 0.365           |
| Di-peptide                  | Mitochondrial  | 0.510           |
| part-Comp.                  | Mitochondrial  | 0.855           |
| chemo-typy                  | Mitochondrial  | 0.495           |
| Neighboring                 | Mitochondrial  | 0.673           |
| Combined SVM classifier:    |                |                 |
|                             | Extracellular  | 0.486           |
|                             | PlasmaMembrane | 0.075           |
|                             | Cytoplasmic    | 0.205           |
|                             | Cytoskeletal   | 0.008           |
|                             | ER             | 0.009           |
|                             | Golgi          | 0.005           |
|                             | Lysosomal      | 0.013           |
|                             | Mitochondrial  | 2.861 *         |
|                             | Chloroplast    | 0.138           |
|                             | Peroxisomal    | 0.087           |
|                             | Vacuole        | 0.025           |
|                             | Nuclear        | 1.088           |
| *****                       |                |                 |
| *****                       |                |                 |
| SeqID: li LinJ_28_0730_mRNA |                |                 |
| CELLO prediction:           |                |                 |
| (predictor                  | location       | reliable-index) |
| Composition                 | Cytoplasmic    | 0.372           |
| Di-peptide                  | Cytoplasmic    | 0.597           |
| part-Comp.                  | Cytoplasmic    | 0.862           |
| chemo-typy                  | Cytoplasmic    | 0.564           |
| Neighboring                 | Cytoplasmic    | 0.895           |
| Combined SVM classifier:    |                |                 |
|                             | Extracellular  | 0.345           |
|                             | PlasmaMembrane | 0.414           |
|                             | Cytoplasmic    | 3.290 *         |
|                             | Cytoskeletal   | 0.006           |
|                             | ER             | 0.010           |
|                             | Golgi          | 0.049           |
|                             | Lysosomal      | 0.012           |
|                             | Mitochondrial  | 0.113           |
|                             | Chloroplast    | 0.063           |
|                             | Peroxisomal    | 0.081           |
|                             | Vacuole        | 0.011           |
|                             | Nuclear        | 0.606           |

**Table S1.** Subcellular localization of proteins retrieved for TriTypDB database showing >80% homology among *L. infantum*, *L. major* and *L. braziliensis*.

\*\*\*\*\*

\*\*\*\*\*

SeqID: li|LinJ\_23\_1470\_mRNA|

CELLO prediction:

| (predictor  | location      | reliable-index) |
|-------------|---------------|-----------------|
| Composition | Extracellular | 0.631           |
| Di-peptide  | Mitochondrial | 0.753           |
| part-Comp.  | Nuclear       | 0.435           |
| chemo-typy  | Cytoplasmic   | 0.371           |
| Neighboring | Mitochondrial | 0.483           |

Combined SVM classifier:

|                |         |
|----------------|---------|
| Extracellular  | 0.748   |
| PlasmaMembrane | 0.046   |
| Cytoplasmic    | 0.864   |
| Cytoskeletal   | 0.026   |
| ER             | 0.020   |
| Golgi          | 0.024   |
| Lysosomal      | 0.009   |
| Mitochondrial  | 1.852 * |
| Chloroplast    | 0.387   |
| Peroxisomal    | 0.031   |
| Vacuole        | 0.024   |
| Nuclear        | 0.968   |

\*\*\*\*\*

\*\*\*\*\*

SeqID: li|LinJ\_35\_0070\_mRNA|

CELLO prediction:

| (predictor  | location      | reliable-index) |
|-------------|---------------|-----------------|
| Composition | Mitochondrial | 0.816           |
| Di-peptide  | Mitochondrial | 0.749           |
| part-Comp.  | Mitochondrial | 0.505           |
| chemo-typy  | Chloroplast   | 0.913           |
| Neighboring | Chloroplast   | 0.465           |

Combined SVM classifier:

|                |         |
|----------------|---------|
| Extracellular  | 0.028   |
| PlasmaMembrane | 0.191   |
| Cytoplasmic    | 0.282   |
| Cytoskeletal   | 0.020   |
| ER             | 0.010   |
| Golgi          | 0.022   |
| Lysosomal      | 0.006   |
| Mitochondrial  | 2.295 * |
| Chloroplast    | 1.701 * |
| Peroxisomal    | 0.358   |
| Vacuole        | 0.028   |
| Nuclear        | 0.057   |

\*\*\*\*\*

\*\*\*\*\*

SeqID: li|LinJ\_19\_0390\_mRNA|

CELLO prediction:

| (predictor  | location      | reliable-index) |
|-------------|---------------|-----------------|
| Composition | Mitochondrial | 0.584           |
| Di-peptide  | Nuclear       | 0.670           |
| part-Comp.  | Mitochondrial | 0.932           |
| chemo-typy  | Nuclear       | 0.439           |

**Table S1.** Subcellular localization of proteins retrieved for TriTypDB database showing >80% homology among *L. infantum*, *L. major* and *L. braziliensis*.

|                             |             |                |                 |       |
|-----------------------------|-------------|----------------|-----------------|-------|
|                             | Neighboring | Nuclear        | 0.823           |       |
| Combined SVM classifier:    |             |                |                 |       |
|                             |             | Extracellular  | 0.152           |       |
|                             |             | PlasmaMembrane | 0.036           |       |
|                             |             | Cytoplasmic    | 0.241           |       |
|                             |             | Cytoskeletal   | 0.013           |       |
|                             |             | ER             | 0.010           |       |
|                             |             | Golgi          | 0.010           |       |
|                             |             | Lysosomal      |                 | 0.005 |
|                             |             | Mitochondrial  | 2.068           | *     |
|                             |             | Chloroplast    | 0.231           |       |
|                             |             | Peroxisomal    | 0.022           |       |
|                             |             | Vacuole        | 0.006           |       |
|                             |             | Nuclear        | 2.206           | *     |
| *****                       |             |                |                 |       |
| *****                       |             |                |                 |       |
| SeqID: li LinJ_35_2270_mRNA |             |                |                 |       |
| CELLO prediction:           |             |                |                 |       |
|                             | (predictor  | location       | reliable-index) |       |
|                             | Composition | Nuclear        | 0.272           |       |
|                             | Di-peptide  | Mitochondrial  | 0.515           |       |
|                             | part-Comp.  | Nuclear        | 0.592           |       |
|                             | chemo-typy  | Nuclear        | 0.406           |       |
|                             | Neighboring | Extracellular  | 0.301           |       |
| Combined SVM classifier:    |             |                |                 |       |
|                             |             | Extracellular  | 0.680           |       |
|                             |             | PlasmaMembrane | 0.068           |       |
|                             |             | Cytoplasmic    | 1.166           | *     |
|                             |             | Cytoskeletal   | 0.046           |       |
|                             |             | ER             | 0.029           |       |
|                             |             | Golgi          | 0.016           |       |
|                             |             | Lysosomal      |                 | 0.011 |
|                             |             | Mitochondrial  | 0.941           |       |
|                             |             | Chloroplast    | 0.263           |       |
|                             |             | Peroxisomal    | 0.041           |       |
|                             |             | Vacuole        | 0.019           |       |
|                             |             | Nuclear        | 1.721           | *     |
| *****                       |             |                |                 |       |
| *****                       |             |                |                 |       |
| SeqID: li LinJ_20_1020_mRNA |             |                |                 |       |
| CELLO prediction:           |             |                |                 |       |
|                             | (predictor  | location       | reliable-index) |       |
|                             | Composition | Nuclear        | 0.736           |       |
|                             | Di-peptide  | Cytoplasmic    | 0.257           |       |
|                             | part-Comp.  | Mitochondrial  | 0.560           |       |
|                             | chemo-typy  | Cytoplasmic    | 0.354           |       |
|                             | Neighboring | Mitochondrial  | 0.396           |       |
| Combined SVM classifier:    |             |                |                 |       |
|                             |             | Extracellular  | 0.315           |       |
|                             |             | PlasmaMembrane | 0.198           |       |
|                             |             | Cytoplasmic    | 0.953           |       |
|                             |             | Cytoskeletal   | 0.019           |       |
|                             |             | ER             | 0.022           |       |
|                             |             | Golgi          | 0.024           |       |

**Table S1.** Subcellular localization of proteins retrieved for TriTypDB database showing >80% homology among *L. infantum*, *L. major* and *L. braziliensis*.

|                             |                |                 |
|-----------------------------|----------------|-----------------|
|                             | Lysosomal      | 0.015           |
|                             | Mitochondrial  | 1.623 *         |
|                             | Chloroplast    | 0.267           |
|                             | Peroxisomal    | 0.073           |
|                             | Vacuole        | 0.012           |
|                             | Nuclear        | 1.478 *         |
| *****                       |                |                 |
| *****                       |                |                 |
| SeqID: li LinJ_32_2850_mRNA |                |                 |
| CELLO prediction:           |                |                 |
| (predictor                  | location       | reliable-index) |
| Composition                 | Mitochondrial  | 0.693           |
| Di-peptide                  | Mitochondrial  | 0.838           |
| part-Comp.                  | Mitochondrial  | 0.299           |
| chemo-typy                  | Mitochondrial  | 0.827           |
| Neighboring                 | Mitochondrial  | 0.798           |
| Combined SVM classifier:    |                |                 |
|                             | Extracellular  | 0.095           |
|                             | PlasmaMembrane | 0.063           |
|                             | Cytoplasmic    | 0.586           |
|                             | Cytoskeletal   | 0.027           |
|                             | ER             | 0.010           |
|                             | Golgi          | 0.007           |
|                             | Lysosomal      | 0.008           |
|                             | Mitochondrial  | 3.454 *         |
|                             | Chloroplast    | 0.117           |
|                             | Peroxisomal    | 0.111           |
|                             | Vacuole        | 0.012           |
|                             | Nuclear        | 0.508           |
| *****                       |                |                 |
| *****                       |                |                 |
| SeqID: li LinJ_34_3670_mRNA |                |                 |
| CELLO prediction:           |                |                 |
| (predictor                  | location       | reliable-index) |
| Composition                 | Mitochondrial  | 0.749           |
| Di-peptide                  | Mitochondrial  | 0.390           |
| part-Comp.                  | Cytoplasmic    | 0.430           |
| chemo-typy                  | Cytoplasmic    | 0.313           |
| Neighboring                 | Cytoplasmic    | 0.311           |
| Combined SVM classifier:    |                |                 |
|                             | Extracellular  | 0.173           |
|                             | PlasmaMembrane | 0.072           |
|                             | Cytoplasmic    | 1.263 *         |
|                             | Cytoskeletal   | 0.015           |
|                             | ER             | 0.070           |
|                             | Golgi          | 0.020           |
|                             | Lysosomal      | 0.006           |
|                             | Mitochondrial  | 1.707 *         |
|                             | Chloroplast    | 0.546           |
|                             | Peroxisomal    | 0.045           |
|                             | Vacuole        | 0.020           |
|                             | Nuclear        | 1.062 *         |

**Table S1.** Subcellular localization of proteins retrieved for TriTypDB database showing >80% homology among *L. infantum*, *L. major* and *L. braziliensis*.

\*\*\*\*\*

\*\*\*\*\*

SeqID: li|LinJ\_33\_0860\_mRNA|

CELLO prediction:

| (predictor  | location    | reliable-index) |
|-------------|-------------|-----------------|
| Composition | Cytoplasmic | 0.518           |
| Di-peptide  | Cytoplasmic | 0.851           |
| part-Comp.  | Cytoplasmic | 0.841           |
| chemo-typy  | Cytoplasmic | 0.691           |
| Neighboring | Cytoplasmic | 0.814           |

Combined SVM classifier:

|                |       |       |
|----------------|-------|-------|
| Extracellular  | 0.097 |       |
| PlasmaMembrane | 0.180 |       |
| Cytoplasmic    | 3.714 | *     |
| Cytoskeletal   | 0.008 |       |
| ER             | 0.026 |       |
| Golgi          | 0.017 |       |
| Lysosomal      |       | 0.045 |
| Mitochondrial  | 0.072 |       |
| Chloroplast    | 0.104 |       |
| Peroxisomal    | 0.031 |       |
| Vacuole        | 0.041 |       |
| Nuclear        | 0.664 |       |

\*\*\*\*\*

\*\*\*\*\*

SeqID: li|LinJ\_22\_1280\_mRNA|

CELLO prediction:

| (predictor  | location    | reliable-index) |
|-------------|-------------|-----------------|
| Composition | Cytoplasmic | 0.363           |
| Di-peptide  | Cytoplasmic | 0.616           |
| part-Comp.  | Chloroplast | 0.628           |
| chemo-typy  | Cytoplasmic | 0.499           |
| Neighboring | Chloroplast | 0.595           |

Combined SVM classifier:

|                |       |       |
|----------------|-------|-------|
| Extracellular  | 0.086 |       |
| PlasmaMembrane | 0.304 |       |
| Cytoplasmic    | 1.959 | *     |
| Cytoskeletal   | 0.009 |       |
| ER             | 0.038 |       |
| Golgi          | 0.022 |       |
| Lysosomal      |       | 0.040 |
| Mitochondrial  | 0.310 |       |
| Chloroplast    | 1.809 | *     |
| Peroxisomal    | 0.056 |       |
| Vacuole        | 0.024 |       |
| Nuclear        | 0.343 |       |

\*\*\*\*\*

\*\*\*\*\*

SeqID: li|LinJ\_27\_0180\_mRNA|

CELLO prediction:

| (predictor  | location      | reliable-index) |
|-------------|---------------|-----------------|
| Composition | Nuclear       | 0.553           |
| Di-peptide  | Mitochondrial | 0.507           |
| part-Comp.  | Nuclear       | 0.411           |
| chemo-typy  | Mitochondrial | 0.515           |

**Table S1.** Subcellular localization of proteins retrieved for TriTypDB database showing >80% homology among *L. infantum*, *L. major* and *L. braziliensis*.

|                             |             |                |                 |       |
|-----------------------------|-------------|----------------|-----------------|-------|
|                             | Neighboring | Mitochondrial  | 0.573           |       |
| Combined SVM classifier:    |             |                |                 |       |
|                             |             | Extracellular  | 0.123           |       |
|                             |             | PlasmaMembrane | 0.027           |       |
|                             |             | Cytoplasmic    | 0.555           |       |
|                             |             | Cytoskeletal   | 0.063           |       |
|                             |             | ER             | 0.022           |       |
|                             |             | Golgi          | 0.008           |       |
|                             |             | Lysosomal      |                 | 0.011 |
|                             |             | Mitochondrial  | 2.066           | *     |
|                             |             | Chloroplast    | 0.056           |       |
|                             |             | Peroxisomal    | 0.064           |       |
|                             |             | Vacuole        | 0.015           |       |
|                             |             | Nuclear        | 1.991           | *     |
| *****                       |             |                |                 |       |
| *****                       |             |                |                 |       |
| SeqID: li LinJ_03_0090_mRNA |             |                |                 |       |
| CELLO prediction:           |             |                |                 |       |
|                             | (predictor  | location       | reliable-index) |       |
|                             | Composition | Chloroplast    | 0.249           |       |
|                             | Di-peptide  | Mitochondrial  | 0.375           |       |
|                             | part-Comp.  | Nuclear        | 0.440           |       |
|                             | chemo-typy  | Cytoplasmic    | 0.380           |       |
|                             | Neighboring | Mitochondrial  | 0.301           |       |
| Combined SVM classifier:    |             |                |                 |       |
|                             |             | Extracellular  | 0.586           |       |
|                             |             | PlasmaMembrane | 0.511           |       |
|                             |             | Cytoplasmic    | 0.826           |       |
|                             |             | Cytoskeletal   | 0.029           |       |
|                             |             | ER             | 0.070           |       |
|                             |             | Golgi          | 0.045           |       |
|                             |             | Lysosomal      |                 | 0.038 |
|                             |             | Mitochondrial  | 1.094           | *     |
|                             |             | Chloroplast    | 0.690           |       |
|                             |             | Peroxisomal    | 0.189           |       |
|                             |             | Vacuole        | 0.073           |       |
|                             |             | Nuclear        | 0.849           |       |
| *****                       |             |                |                 |       |
| *****                       |             |                |                 |       |
| SeqID: li LinJ_28_0680_mRNA |             |                |                 |       |
| CELLO prediction:           |             |                |                 |       |
|                             | (predictor  | location       | reliable-index) |       |
|                             | Composition | PlasmaMembrane | 0.975           |       |
|                             | Di-peptide  | PlasmaMembrane | 0.532           |       |
|                             | part-Comp.  | PlasmaMembrane | 0.393           |       |
|                             | chemo-typy  | PlasmaMembrane | 0.772           |       |
|                             | Neighboring | PlasmaMembrane | 0.342           |       |
| Combined SVM classifier:    |             |                |                 |       |
|                             |             | Extracellular  | 0.591           |       |
|                             |             | PlasmaMembrane | 3.015           | *     |
|                             |             | Cytoplasmic    | 0.308           |       |
|                             |             | Cytoskeletal   | 0.010           |       |
|                             |             | ER             | 0.017           |       |
|                             |             | Golgi          | 0.014           |       |



**Table S1.** Subcellular localization of proteins retrieved for TriTypDB database showing >80% homology among *L. infantum*, *L. major* and *L. braziliensis*.

|                             |                |                 |
|-----------------------------|----------------|-----------------|
|                             | Lysosomal      | 0.015           |
|                             | Mitochondrial  | 0.342           |
|                             | Chloroplast    | 0.369           |
|                             | Peroxisomal    | 0.032           |
|                             | Vacuole        | 0.008           |
|                             | Nuclear        | 0.279           |
| *****                       |                |                 |
| *****                       |                |                 |
| SeqID: li LinJ_26_1610_mRNA |                |                 |
| CELLO prediction:           |                |                 |
| (predictor                  | location       | reliable-index) |
| Composition                 | Cytoplasmic    | 0.297           |
| Di-peptide                  | Chloroplast    | 0.428           |
| part-Comp.                  | Nuclear        | 0.938           |
| chemo-typy                  | Nuclear        | 0.481           |
| Neighboring                 | Nuclear        | 0.668           |
| Combined SVM classifier:    |                |                 |
|                             | Extracellular  | 0.061           |
|                             | PlasmaMembrane | 0.040           |
|                             | Cytoplasmic    | 1.110           |
|                             | Cytoskeletal   | 0.020           |
|                             | ER             | 0.013           |
|                             | Golgi          | 0.012           |
|                             | Lysosomal      | 0.010           |
|                             | Mitochondrial  | 0.489           |
|                             | Chloroplast    | 0.688           |
|                             | Peroxisomal    | 0.026           |
|                             | Vacuole        | 0.018           |
|                             | Nuclear        | 2.513 *         |
| *****                       |                |                 |
| *****                       |                |                 |
| SeqID: li LinJ_36_3070_mRNA |                |                 |
| CELLO prediction:           |                |                 |
| (predictor                  | location       | reliable-index) |
| Composition                 | Extracellular  | 0.945           |
| Di-peptide                  | Extracellular  | 0.698           |
| part-Comp.                  | Extracellular  | 0.343           |
| chemo-typy                  | Nuclear        | 0.366           |
| Neighboring                 | Extracellular  | 0.714           |
| Combined SVM classifier:    |                |                 |
|                             | Extracellular  | 2.728 *         |
|                             | PlasmaMembrane | 0.113           |
|                             | Cytoplasmic    | 0.485           |
|                             | Cytoskeletal   | 0.015           |
|                             | ER             | 0.017           |
|                             | Golgi          | 0.018           |
|                             | Lysosomal      | 0.034           |
|                             | Mitochondrial  | 0.404           |
|                             | Chloroplast    | 0.253           |
|                             | Peroxisomal    | 0.024           |
|                             | Vacuole        | 0.015           |
|                             | Nuclear        | 0.892           |

**Table S1.** Subcellular localization of proteins retrieved for TriTypDB database showing >80% homology among *L. infantum*, *L. major* and *L. braziliensis*.

\*\*\*\*\*

\*\*\*\*\*

SeqID: li|LinJ\_15\_1010\_mRNA|

CELLO prediction:

| (predictor  | location      | reliable-index) |
|-------------|---------------|-----------------|
| Composition | Mitochondrial | 0.401           |
| Di-peptide  | Mitochondrial | 0.599           |
| part-Comp.  | Mitochondrial | 0.478           |
| chemo-typy  | Nuclear       | 0.432           |
| Neighboring | Cytoplasmic   | 0.534           |

Combined SVM classifier:

|                |         |
|----------------|---------|
| Extracellular  | 0.032   |
| PlasmaMembrane | 0.089   |
| Cytoplasmic    | 1.509 * |
| Cytoskeletal   | 0.014   |
| ER             | 0.015   |
| Golgi          | 0.014   |
| Lysosomal      | 0.013   |
| Mitochondrial  | 1.817 * |
| Chloroplast    | 0.352   |
| Peroxisomal    | 0.154   |
| Vacuole        | 0.014   |
| Nuclear        | 0.977   |

\*\*\*\*\*

\*\*\*\*\*

SeqID: li|LinJ\_30\_0710\_mRNA|

CELLO prediction:

| (predictor  | location      | reliable-index) |
|-------------|---------------|-----------------|
| Composition | Cytoplasmic   | 0.343           |
| Di-peptide  | Mitochondrial | 0.441           |
| part-Comp.  | Nuclear       | 0.710           |
| chemo-typy  | Mitochondrial | 0.432           |
| Neighboring | Mitochondrial | 0.396           |

Combined SVM classifier:

|                |         |
|----------------|---------|
| Extracellular  | 0.206   |
| PlasmaMembrane | 0.061   |
| Cytoplasmic    | 0.980   |
| Cytoskeletal   | 0.016   |
| ER             | 0.017   |
| Golgi          | 0.011   |
| Lysosomal      | 0.011   |
| Mitochondrial  | 1.504 * |
| Chloroplast    | 0.168   |
| Peroxisomal    | 0.028   |
| Vacuole        | 0.014   |
| Nuclear        | 1.983 * |

\*\*\*\*\*

\*\*\*\*\*

SeqID: li|LinJ\_25\_1050\_mRNA|

CELLO prediction:

| (predictor  | location       | reliable-index) |
|-------------|----------------|-----------------|
| Composition | PlasmaMembrane | 0.643           |
| Di-peptide  | PlasmaMembrane | 0.569           |
| part-Comp.  | PlasmaMembrane | 0.402           |
| chemo-typy  | PlasmaMembrane | 0.506           |

**Table S1.** Subcellular localization of proteins retrieved for TriTypDB database showing >80% homology among *L. infantum*, *L. major* and *L. braziliensis*.

|                             |             |                |                 |       |
|-----------------------------|-------------|----------------|-----------------|-------|
|                             | Neighboring | Nuclear        | 0.243           |       |
| Combined SVM classifier:    |             |                |                 |       |
|                             |             | Extracellular  | 0.517           |       |
|                             |             | PlasmaMembrane | 2.210           | *     |
|                             |             | Cytoplasmic    | 0.426           |       |
|                             |             | Cytoskeletal   | 0.017           |       |
|                             |             | ER             | 0.024           |       |
|                             |             | Golgi          | 0.018           |       |
|                             |             | Lysosomal      |                 | 0.023 |
|                             |             | Mitochondrial  | 0.568           |       |
|                             |             | Chloroplast    | 0.360           |       |
|                             |             | Peroxisomal    | 0.040           |       |
|                             |             | Vacuole        | 0.023           |       |
|                             |             | Nuclear        | 0.776           |       |
| *****                       |             |                |                 |       |
| *****                       |             |                |                 |       |
| SeqID: li LinJ_05_0030_mRNA |             |                |                 |       |
| CELLO prediction:           |             |                |                 |       |
|                             | (predictor  | location       | reliable-index) |       |
|                             | Composition | Lysosomal      |                 | 0.273 |
|                             | Di-peptide  | Extracellular  | 0.380           |       |
|                             | part-Comp.  | Lysosomal      |                 | 0.375 |
|                             | chemo-typy  | Cytoplasmic    | 0.362           |       |
|                             | Neighboring | Lysosomal      |                 | 0.219 |
| Combined SVM classifier:    |             |                |                 |       |
|                             |             | Extracellular  | 0.911           |       |
|                             |             | PlasmaMembrane | 0.095           |       |
|                             |             | Cytoplasmic    | 0.864           |       |
|                             |             | Cytoskeletal   | 0.013           |       |
|                             |             | ER             | 0.247           |       |
|                             |             | Golgi          | 0.040           |       |
|                             |             | Lysosomal      |                 | 0.892 |
|                             |             | Mitochondrial  | 0.942           | *     |
|                             |             | Chloroplast    | 0.595           |       |
|                             |             | Peroxisomal    | 0.121           |       |
|                             |             | Vacuole        | 0.072           |       |
|                             |             | Nuclear        | 0.208           |       |
| *****                       |             |                |                 |       |
| *****                       |             |                |                 |       |
| SeqID: li LinJ_18_1180_mRNA |             |                |                 |       |
| CELLO prediction:           |             |                |                 |       |
|                             | (predictor  | location       | reliable-index) |       |
|                             | Composition | Mitochondrial  | 0.296           |       |
|                             | Di-peptide  | Extracellular  | 0.566           |       |
|                             | part-Comp.  | PlasmaMembrane | 0.465           |       |
|                             | chemo-typy  | Extracellular  | 0.730           |       |
|                             | Neighboring | Mitochondrial  | 0.572           |       |
| Combined SVM classifier:    |             |                |                 |       |
|                             |             | Extracellular  | 1.513           | *     |
|                             |             | PlasmaMembrane | 0.660           |       |
|                             |             | Cytoplasmic    | 1.036           | *     |
|                             |             | Cytoskeletal   | 0.047           |       |
|                             |             | ER             | 0.051           |       |
|                             |             | Golgi          | 0.019           |       |

**Table S1.** Subcellular localization of proteins retrieved for TriTypDB database showing >80% homology among *L. infantum*, *L. major* and *L. braziliensis*.

|                             |                |                 |
|-----------------------------|----------------|-----------------|
|                             | Lysosomal      | 0.055           |
|                             | Mitochondrial  | 0.966           |
|                             | Chloroplast    | 0.234           |
|                             | Peroxisomal    | 0.114           |
|                             | Vacuole        | 0.083           |
|                             | Nuclear        | 0.222           |
| *****                       |                |                 |
| *****                       |                |                 |
| SeqID: li LinJ_22_0340_mRNA |                |                 |
| CELLO prediction:           |                |                 |
| (predictor                  | location       | reliable-index) |
| Composition                 | Mitochondrial  | 0.636           |
| Di-peptide                  | Mitochondrial  | 0.711           |
| part-Comp.                  | Cytoplasmic    | 0.428           |
| chemo-typy                  | Nuclear        | 0.849           |
| Neighboring                 | Mitochondrial  | 0.605           |
| Combined SVM classifier:    |                |                 |
|                             | Extracellular  | 0.058           |
|                             | PlasmaMembrane | 0.025           |
|                             | Cytoplasmic    | 1.210           |
|                             | Cytoskeletal   | 0.019           |
|                             | ER             | 0.019           |
|                             | Golgi          | 0.009           |
|                             | Lysosomal      | 0.009           |
|                             | Mitochondrial  | 2.167 *         |
|                             | Chloroplast    | 0.115           |
|                             | Peroxisomal    | 0.068           |
|                             | Vacuole        | 0.007           |
|                             | Nuclear        | 1.296           |
| *****                       |                |                 |
| *****                       |                |                 |
| SeqID: li LinJ_13_1530_mRNA |                |                 |
| CELLO prediction:           |                |                 |
| (predictor                  | location       | reliable-index) |
| Composition                 | Cytoplasmic    | 0.380           |
| Di-peptide                  | Cytoplasmic    | 0.819           |
| part-Comp.                  | Nuclear        | 0.643           |
| chemo-typy                  | Cytoplasmic    | 0.691           |
| Neighboring                 | Cytoplasmic    | 0.636           |
| Combined SVM classifier:    |                |                 |
|                             | Extracellular  | 0.193           |
|                             | PlasmaMembrane | 0.021           |
|                             | Cytoplasmic    | 2.797 *         |
|                             | Cytoskeletal   | 0.012           |
|                             | ER             | 0.151           |
|                             | Golgi          | 0.023           |
|                             | Lysosomal      | 0.012           |
|                             | Mitochondrial  | 0.404           |
|                             | Chloroplast    | 0.179           |
|                             | Peroxisomal    | 0.045           |
|                             | Vacuole        | 0.036           |
|                             | Nuclear        | 1.126           |

**Table S1.** Subcellular localization of proteins retrieved for TriTypDB database showing >80% homology among *L. infantum*, *L. major* and *L. braziliensis*.

\*\*\*\*\*

\*\*\*\*\*

SeqID: li|LinJ\_35\_3810\_mRNA|

CELLO prediction:

| (predictor  | location      | reliable-index) |
|-------------|---------------|-----------------|
| Composition | Mitochondrial | 0.519           |
| Di-peptide  | Nuclear       | 0.820           |
| part-Comp.  | Mitochondrial | 0.319           |
| chemo-typy  | Nuclear       | 0.991           |
| Neighboring | Mitochondrial | 0.757           |

Combined SVM classifier:

|                |         |
|----------------|---------|
| Extracellular  | 0.051   |
| PlasmaMembrane | 0.013   |
| Cytoplasmic    | 0.755   |
| Cytoskeletal   | 0.010   |
| ER             | 0.013   |
| Golgi          | 0.007   |
| Lysosomal      | 0.016   |
| Mitochondrial  | 1.691 * |
| Chloroplast    | 0.057   |
| Peroxisomal    | 0.080   |
| Vacuole        | 0.013   |
| Nuclear        | 2.293 * |

\*\*\*\*\*

\*\*\*\*\*

SeqID: li|LinJ\_25\_0670\_mRNA|

CELLO prediction:

| (predictor  | location      | reliable-index) |
|-------------|---------------|-----------------|
| Composition | Mitochondrial | 0.287           |
| Di-peptide  | Mitochondrial | 0.617           |
| part-Comp.  | Mitochondrial | 0.385           |
| chemo-typy  | Mitochondrial | 0.571           |
| Neighboring | Extracellular | 0.844           |

Combined SVM classifier:

|                |         |
|----------------|---------|
| Extracellular  | 1.187   |
| PlasmaMembrane | 0.402   |
| Cytoplasmic    | 0.126   |
| Cytoskeletal   | 0.011   |
| ER             | 0.054   |
| Golgi          | 0.009   |
| Lysosomal      | 0.079   |
| Mitochondrial  | 1.921 * |
| Chloroplast    | 0.471   |
| Peroxisomal    | 0.068   |
| Vacuole        | 0.036   |
| Nuclear        | 0.637   |

\*\*\*\*\*

\*\*\*\*\*

SeqID: li|LinJ\_22\_0004\_mRNA|

CELLO prediction:

| (predictor  | location    | reliable-index) |
|-------------|-------------|-----------------|
| Composition | Cytoplasmic | 0.578           |
| Di-peptide  | Cytoplasmic | 0.851           |
| part-Comp.  | Cytoplasmic | 0.668           |
| chemo-typy  | Nuclear     | 0.685           |

**Table S1.** Subcellular localization of proteins retrieved for TriTypDB database showing >80% homology among *L. infantum*, *L. major* and *L. braziliensis*.

|                             |             |                |                 |       |
|-----------------------------|-------------|----------------|-----------------|-------|
|                             | Neighboring | Cytoplasmic    | 0.538           |       |
| Combined SVM classifier:    |             |                |                 |       |
|                             |             | Extracellular  | 0.035           |       |
|                             |             | PlasmaMembrane | 0.016           |       |
|                             |             | Cytoplasmic    | 2.909 *         |       |
|                             |             | Cytoskeletal   | 0.017           |       |
|                             |             | ER             | 0.023           |       |
|                             |             | Golgi          | 0.010           |       |
|                             |             | Lysosomal      |                 | 0.006 |
|                             |             | Mitochondrial  | 0.364           |       |
|                             |             | Chloroplast    | 0.126           |       |
|                             |             | Peroxisomal    | 0.037           |       |
|                             |             | Vacuole        | 0.007           |       |
|                             |             | Nuclear        | 1.452           |       |
| *****                       |             |                |                 |       |
| *****                       |             |                |                 |       |
| SeqID: li LinJ_30_2000_mRNA |             |                |                 |       |
| CELLO prediction:           |             |                |                 |       |
|                             | (predictor  | location       | reliable-index) |       |
|                             | Composition | Cytoplasmic    | 0.378           |       |
|                             | Di-peptide  | Cytoplasmic    | 0.624           |       |
|                             | part-Comp.  | Nuclear        | 0.407           |       |
|                             | chemo-typy  | Cytoplasmic    | 0.479           |       |
|                             | Neighboring | Cytoplasmic    | 0.466           |       |
| Combined SVM classifier:    |             |                |                 |       |
|                             |             | Extracellular  | 0.431           |       |
|                             |             | PlasmaMembrane | 0.063           |       |
|                             |             | Cytoplasmic    | 2.150 *         |       |
|                             |             | Cytoskeletal   | 0.274           |       |
|                             |             | ER             | 0.020           |       |
|                             |             | Golgi          | 0.070           |       |
|                             |             | Lysosomal      |                 | 0.010 |
|                             |             | Mitochondrial  | 0.435           |       |
|                             |             | Chloroplast    | 0.378           |       |
|                             |             | Peroxisomal    | 0.038           |       |
|                             |             | Vacuole        | 0.020           |       |
|                             |             | Nuclear        | 1.111           |       |
| *****                       |             |                |                 |       |
| *****                       |             |                |                 |       |
| SeqID: li LinJ_22_0440_mRNA |             |                |                 |       |
| CELLO prediction:           |             |                |                 |       |
|                             | (predictor  | location       | reliable-index) |       |
|                             | Composition | Cytoplasmic    | 0.428           |       |
|                             | Di-peptide  | Cytoplasmic    | 0.831           |       |
|                             | part-Comp.  | Cytoplasmic    | 0.639           |       |
|                             | chemo-typy  | Cytoplasmic    | 0.889           |       |
|                             | Neighboring | Cytoplasmic    | 0.536           |       |
| Combined SVM classifier:    |             |                |                 |       |
|                             |             | Extracellular  | 0.015           |       |
|                             |             | PlasmaMembrane | 0.011           |       |
|                             |             | Cytoplasmic    | 3.324 *         |       |
|                             |             | Cytoskeletal   | 0.020           |       |
|                             |             | ER             | 0.014           |       |
|                             |             | Golgi          | 0.012           |       |

**Table S1.** Subcellular localization of proteins retrieved for TriTypDB database showing >80% homology among *L. infantum*, *L. major* and *L. braziliensis*.

|                             |                |                 |
|-----------------------------|----------------|-----------------|
|                             | Lysosomal      | 0.004           |
|                             | Mitochondrial  | 0.626           |
|                             | Chloroplast    | 0.176           |
|                             | Peroxisomal    | 0.030           |
|                             | Vacuole        | 0.005           |
|                             | Nuclear        | 0.763           |
| *****                       |                |                 |
| *****                       |                |                 |
| SeqID: li LinJ_34_2160_mRNA |                |                 |
| CELLO prediction:           |                |                 |
| (predictor                  | location       | reliable-index) |
| Composition                 | Cytoplasmic    | 0.463           |
| Di-peptide                  | Nuclear        | 0.937           |
| part-Comp.                  | Nuclear        | 0.390           |
| chemo-typy                  | Cytoplasmic    | 0.693           |
| Neighboring                 | Nuclear        | 0.285           |
| Combined SVM classifier:    |                |                 |
|                             | Extracellular  | 0.142           |
|                             | PlasmaMembrane | 0.031           |
|                             | Cytoplasmic    | 1.758 *         |
|                             | Cytoskeletal   | 0.070           |
|                             | ER             | 0.053           |
|                             | Golgi          | 0.038           |
|                             | Lysosomal      | 0.007           |
|                             | Mitochondrial  | 0.449           |
|                             | Chloroplast    | 0.377           |
|                             | Peroxisomal    | 0.032           |
|                             | Vacuole        | 0.052           |
|                             | Nuclear        | 1.991 *         |
| *****                       |                |                 |
| *****                       |                |                 |
| SeqID: li LinJ_06_0010_mRNA |                |                 |
| CELLO prediction:           |                |                 |
| (predictor                  | location       | reliable-index) |
| Composition                 | Cytoplasmic    | 0.557           |
| Di-peptide                  | Nuclear        | 0.808           |
| part-Comp.                  | Nuclear        | 0.567           |
| chemo-typy                  | Nuclear        | 0.793           |
| Neighboring                 | Nuclear        | 0.511           |
| Combined SVM classifier:    |                |                 |
|                             | Extracellular  | 0.113           |
|                             | PlasmaMembrane | 0.036           |
|                             | Cytoplasmic    | 0.889           |
|                             | Cytoskeletal   | 0.013           |
|                             | ER             | 0.013           |
|                             | Golgi          | 0.008           |
|                             | Lysosomal      | 0.008           |
|                             | Mitochondrial  | 0.798           |
|                             | Chloroplast    | 0.263           |
|                             | Peroxisomal    | 0.032           |
|                             | Vacuole        | 0.015           |
|                             | Nuclear        | 2.811 *         |

**Table S1.** Subcellular localization of proteins retrieved for TriTypDB database showing >80% homology among *L. infantum*, *L. major* and *L. braziliensis*.

\*\*\*\*\*

\*\*\*\*\*

SeqID: li|LinJ\_21\_1790\_mRNA|

CELLO prediction:

| (predictor  | location      | reliable-index) |
|-------------|---------------|-----------------|
| Composition | Mitochondrial | 0.545           |
| Di-peptide  | Mitochondrial | 0.540           |
| part-Comp.  | Mitochondrial | 0.613           |
| chemo-typy  | Mitochondrial | 0.784           |
| Neighboring | Mitochondrial | 0.445           |

Combined SVM classifier:

|                |         |
|----------------|---------|
| Extracellular  | 0.084   |
| PlasmaMembrane | 0.032   |
| Cytoplasmic    | 0.907   |
| Cytoskeletal   | 0.010   |
| ER             | 0.017   |
| Golgi          | 0.008   |
| Lysosomal      | 0.008   |
| Mitochondrial  | 2.927 * |
| Chloroplast    | 0.128   |
| Peroxisomal    | 0.056   |
| Vacuole        | 0.008   |
| Nuclear        | 0.814   |

\*\*\*\*\*

\*\*\*\*\*

SeqID: li|LinJ\_35\_3720\_mRNA|

CELLO prediction:

| (predictor  | location      | reliable-index) |
|-------------|---------------|-----------------|
| Composition | Mitochondrial | 0.588           |
| Di-peptide  | Mitochondrial | 0.713           |
| part-Comp.  | Cytoplasmic   | 0.456           |
| chemo-typy  | Cytoplasmic   | 0.587           |
| Neighboring | Mitochondrial | 0.652           |

Combined SVM classifier:

|                |         |
|----------------|---------|
| Extracellular  | 0.281   |
| PlasmaMembrane | 0.157   |
| Cytoplasmic    | 1.651 * |
| Cytoskeletal   | 0.018   |
| ER             | 0.037   |
| Golgi          | 0.010   |
| Lysosomal      | 0.101   |
| Mitochondrial  | 2.015 * |
| Chloroplast    | 0.147   |
| Peroxisomal    | 0.075   |
| Vacuole        | 0.009   |
| Nuclear        | 0.498   |

\*\*\*\*\*

\*\*\*\*\*

SeqID: li|LinJ\_16\_1390\_mRNA|

CELLO prediction:

| (predictor  | location      | reliable-index) |
|-------------|---------------|-----------------|
| Composition | Mitochondrial | 0.537           |
| Di-peptide  | Mitochondrial | 0.499           |
| part-Comp.  | Mitochondrial | 0.827           |
| chemo-typy  | Mitochondrial | 0.472           |



**Table S1.** Subcellular localization of proteins retrieved for TriTypDB database showing >80% homology among *L. infantum*, *L. major* and *L. braziliensis*.

|                             |             |                |                 |       |
|-----------------------------|-------------|----------------|-----------------|-------|
|                             | Neighboring | Mitochondrial  | 0.737           |       |
| Combined SVM classifier:    |             |                |                 |       |
|                             |             | Extracellular  | 0.121           |       |
|                             |             | PlasmaMembrane | 0.021           |       |
|                             |             | Cytoplasmic    | 0.914           |       |
|                             |             | Cytoskeletal   | 0.008           |       |
|                             |             | ER             | 0.026           |       |
|                             |             | Golgi          | 0.011           |       |
|                             |             | Lysosomal      |                 | 0.009 |
|                             |             | Mitochondrial  | 3.072           | *     |
|                             |             | Chloroplast    | 0.329           |       |
|                             |             | Peroxisomal    | 0.094           |       |
|                             |             | Vacuole        | 0.019           |       |
|                             |             | Nuclear        | 0.377           |       |
| *****                       |             |                |                 |       |
| *****                       |             |                |                 |       |
| SeqID: li LinJ_10_0050_mRNA |             |                |                 |       |
| CELLO prediction:           |             |                |                 |       |
|                             | (predictor  | location       | reliable-index) |       |
|                             | Composition | Mitochondrial  | 0.337           |       |
|                             | Di-peptide  | Nuclear        | 0.724           |       |
|                             | part-Comp.  | Mitochondrial  | 0.576           |       |
|                             | chemo-typy  | Nuclear        | 0.753           |       |
|                             | Neighboring | Mitochondrial  | 0.368           |       |
| Combined SVM classifier:    |             |                |                 |       |
|                             |             | Extracellular  | 0.137           |       |
|                             |             | PlasmaMembrane | 0.054           |       |
|                             |             | Cytoplasmic    | 0.303           |       |
|                             |             | Cytoskeletal   | 0.017           |       |
|                             |             | ER             | 0.013           |       |
|                             |             | Golgi          | 0.008           |       |
|                             |             | Lysosomal      |                 | 0.010 |
|                             |             | Mitochondrial  | 1.701           | *     |
|                             |             | Chloroplast    | 0.429           |       |
|                             |             | Peroxisomal    | 0.045           |       |
|                             |             | Vacuole        | 0.016           |       |
|                             |             | Nuclear        | 2.267           | *     |
| *****                       |             |                |                 |       |
| *****                       |             |                |                 |       |
| SeqID: li LinJ_28_1050_mRNA |             |                |                 |       |
| CELLO prediction:           |             |                |                 |       |
|                             | (predictor  | location       | reliable-index) |       |
|                             | Composition | Cytoplasmic    | 0.374           |       |
|                             | Di-peptide  | Chloroplast    | 0.328           |       |
|                             | part-Comp.  | Cytoplasmic    | 0.854           |       |
|                             | chemo-typy  | Cytoplasmic    | 0.824           |       |
|                             | Neighboring | Cytoplasmic    | 0.468           |       |
| Combined SVM classifier:    |             |                |                 |       |
|                             |             | Extracellular  | 0.084           |       |
|                             |             | PlasmaMembrane | 0.025           |       |
|                             |             | Cytoplasmic    | 2.736           | *     |
|                             |             | Cytoskeletal   | 0.013           |       |
|                             |             | ER             | 0.013           |       |
|                             |             | Golgi          | 0.008           |       |

**Table S1.** Subcellular localization of proteins retrieved for TriTypDB database showing >80% homology among *L. infantum*, *L. major* and *L. braziliensis*.

|                             |                |                 |
|-----------------------------|----------------|-----------------|
|                             | Lysosomal      | 0.015           |
|                             | Mitochondrial  | 0.746           |
|                             | Chloroplast    | 0.682           |
|                             | Peroxisomal    | 0.049           |
|                             | Vacuole        | 0.022           |
|                             | Nuclear        | 0.606           |
| *****                       |                |                 |
| *****                       |                |                 |
| SeqID: li LinJ_13_0330_mRNA |                |                 |
| CELLO prediction:           |                |                 |
| (predictor                  | location       | reliable-index) |
| Composition                 | Cytoplasmic    | 0.739           |
| Di-peptide                  | Cytoplasmic    | 0.775           |
| part-Comp.                  | Cytoplasmic    | 0.914           |
| chemo-typy                  | Chloroplast    | 0.354           |
| Neighboring                 | Cytoplasmic    | 0.367           |
| Combined SVM classifier:    |                |                 |
|                             | Extracellular  | 0.271           |
|                             | PlasmaMembrane | 0.107           |
|                             | Cytoplasmic    | 3.114 *         |
|                             | Cytoskeletal   | 0.008           |
|                             | ER             | 0.066           |
|                             | Golgi          | 0.024           |
|                             | Lysosomal      | 0.046           |
|                             | Mitochondrial  | 0.187           |
|                             | Chloroplast    | 0.507           |
|                             | Peroxisomal    | 0.137           |
|                             | Vacuole        | 0.119           |
|                             | Nuclear        | 0.415           |
| *****                       |                |                 |
| *****                       |                |                 |
| SeqID: li LinJ_35_0140_mRNA |                |                 |
| CELLO prediction:           |                |                 |
| (predictor                  | location       | reliable-index) |
| Composition                 | Mitochondrial  | 0.864           |
| Di-peptide                  | Mitochondrial  | 0.919           |
| part-Comp.                  | Mitochondrial  | 0.554           |
| chemo-typy                  | Mitochondrial  | 0.865           |
| Neighboring                 | Mitochondrial  | 0.468           |
| Combined SVM classifier:    |                |                 |
|                             | Extracellular  | 0.199           |
|                             | PlasmaMembrane | 0.490           |
|                             | Cytoplasmic    | 0.185           |
|                             | Cytoskeletal   | 0.022           |
|                             | ER             | 0.016           |
|                             | Golgi          | 0.008           |
|                             | Lysosomal      | 0.038           |
|                             | Mitochondrial  | 3.669 *         |
|                             | Chloroplast    | 0.059           |
|                             | Peroxisomal    | 0.062           |
|                             | Vacuole        | 0.009           |
|                             | Nuclear        | 0.242           |

**Table S1.** Subcellular localization of proteins retrieved for TriTypDB database showing >80% homology among *L. infantum*, *L. major* and *L. braziliensis*.

```

*****
*****
SeqID: li|LinJ_31_2350_mRNA|
      CELLO prediction:
              (predictor      location      reliable-index)
Composition      Cytoplasmic      0.409
Di-peptide       Mitochondrial    0.287
part-Comp.       Chloroplast      0.310
chemo-typy       Extracellular    0.404
Neighboring      Chloroplast      0.324

      Combined SVM classifier:
                                Extracellular  1.064  *
                                PlasmaMembrane 0.539
                                Cytoplasmic     0.924
                                Cytoskeletal     0.018
                                ER               0.124
                                Golgi            0.050
                                Lysosomal        0.105
                                Mitochondrial    0.768
                                Chloroplast      1.076  *
                                Peroxisomal      0.090
                                Vacuole          0.070
                                Nuclear           0.170

*****
*****
SeqID: li|LinJ_30_3240_mRNA|
      CELLO prediction:
              (predictor      location      reliable-index)
Composition      Cytoplasmic      0.266
Di-peptide       Mitochondrial    0.459
part-Comp.       Nuclear          0.551
chemo-typy       Nuclear          0.467
Neighboring      Mitochondrial    0.374

      Combined SVM classifier:
                                Extracellular  0.110
                                PlasmaMembrane 0.055
                                Cytoplasmic     0.846
                                Cytoskeletal     0.022
                                ER               0.017
                                Golgi            0.013
                                Lysosomal        0.015
                                Mitochondrial    1.634  *
                                Chloroplast      0.196
                                Peroxisomal      0.048
                                Vacuole          0.018
                                Nuclear           2.026  *

*****
*****
SeqID: li|LinJ_13_0450_mRNA|
      CELLO prediction:
              (predictor      location      reliable-index)
Composition      Mitochondrial    0.507
Di-peptide       Mitochondrial    0.796
part-Comp.       Mitochondrial    0.381
chemo-typy       Nuclear          0.549

```

**Table S1.** Subcellular localization of proteins retrieved for TriTypDB database showing >80% homology among *L. infantum*, *L. major* and *L. braziliensis*.

|                             |             |                |                 |       |
|-----------------------------|-------------|----------------|-----------------|-------|
|                             | Neighboring | Mitochondrial  | 0.490           |       |
| Combined SVM classifier:    |             |                |                 |       |
|                             |             | Extracellular  | 0.068           |       |
|                             |             | PlasmaMembrane | 0.152           |       |
|                             |             | Cytoplasmic    | 0.659           |       |
|                             |             | Cytoskeletal   | 0.023           |       |
|                             |             | ER             | 0.022           |       |
|                             |             | Golgi          | 0.016           |       |
|                             |             | Lysosomal      |                 | 0.015 |
|                             |             | Mitochondrial  | 2.409           | *     |
|                             |             | Chloroplast    | 0.357           |       |
|                             |             | Peroxisomal    | 0.092           |       |
|                             |             | Vacuole        | 0.018           |       |
|                             |             | Nuclear        | 1.170           |       |
| *****                       |             |                |                 |       |
| *****                       |             |                |                 |       |
| SeqID: li LinJ_34_0460_mRNA |             |                |                 |       |
| CELLO prediction:           |             |                |                 |       |
|                             | (predictor  | location       | reliable-index) |       |
|                             | Composition | Nuclear        | 0.588           |       |
|                             | Di-peptide  | Mitochondrial  | 0.430           |       |
|                             | part-Comp.  | Nuclear        | 0.738           |       |
|                             | chemo-typy  | Nuclear        | 0.361           |       |
|                             | Neighboring | Nuclear        | 0.385           |       |
| Combined SVM classifier:    |             |                |                 |       |
|                             |             | Extracellular  | 0.318           |       |
|                             |             | PlasmaMembrane | 0.111           |       |
|                             |             | Cytoplasmic    | 0.646           |       |
|                             |             | Cytoskeletal   | 0.014           |       |
|                             |             | ER             | 0.009           |       |
|                             |             | Golgi          | 0.010           |       |
|                             |             | Lysosomal      |                 | 0.007 |
|                             |             | Mitochondrial  | 1.129           |       |
|                             |             | Chloroplast    | 0.223           |       |
|                             |             | Peroxisomal    | 0.030           |       |
|                             |             | Vacuole        | 0.008           |       |
|                             |             | Nuclear        | 2.494           | *     |
| *****                       |             |                |                 |       |
| *****                       |             |                |                 |       |
| SeqID: li LinJ_08_0830_mRNA |             |                |                 |       |
| CELLO prediction:           |             |                |                 |       |
|                             | (predictor  | location       | reliable-index) |       |
|                             | Composition | Cytoplasmic    | 0.603           |       |
|                             | Di-peptide  | Cytoplasmic    | 0.732           |       |
|                             | part-Comp.  | Mitochondrial  | 0.438           |       |
|                             | chemo-typy  | Cytoplasmic    | 0.596           |       |
|                             | Neighboring | Cytoplasmic    | 0.583           |       |
| Combined SVM classifier:    |             |                |                 |       |
|                             |             | Extracellular  | 0.006           |       |
|                             |             | PlasmaMembrane | 0.007           |       |
|                             |             | Cytoplasmic    | 2.768           | *     |
|                             |             | Cytoskeletal   | 0.011           |       |
|                             |             | ER             | 0.016           |       |
|                             |             | Golqi          | 0.014           |       |

**Table S1.** Subcellular localization of proteins retrieved for TriTypDB database showing >80% homology among *L. infantum*, *L. major* and *L. braziliensis*.

|                             |                |                 |
|-----------------------------|----------------|-----------------|
|                             | Lysosomal      | 0.002           |
|                             | Mitochondrial  | 1.270           |
|                             | Chloroplast    | 0.230           |
|                             | Peroxisomal    | 0.213           |
|                             | Vacuole        | 0.004           |
|                             | Nuclear        | 0.458           |
| *****                       |                |                 |
| *****                       |                |                 |
| SeqID: li LinJ_28_2360_mRNA |                |                 |
| CELLO prediction:           |                |                 |
| (predictor                  | location       | reliable-index) |
| Composition                 | Extracellular  | 0.372           |
| Di-peptide                  | Mitochondrial  | 0.747           |
| part-Comp.                  | Nuclear        | 0.664           |
| chemo-typy                  | Nuclear        | 0.441           |
| Neighboring                 | Nuclear        | 0.506           |
| Combined SVM classifier:    |                |                 |
|                             | Extracellular  | 0.598           |
|                             | PlasmaMembrane | 0.083           |
|                             | Cytoplasmic    | 0.465           |
|                             | Cytoskeletal   | 0.020           |
|                             | ER             | 0.011           |
|                             | Golgi          | 0.009           |
|                             | Lysosomal      | 0.010           |
|                             | Mitochondrial  | 1.698 *         |
|                             | Chloroplast    | 0.155           |
|                             | Peroxisomal    | 0.033           |
|                             | Vacuole        | 0.010           |
|                             | Nuclear        | 1.909 *         |
| *****                       |                |                 |
| *****                       |                |                 |
| SeqID: li LinJ_31_1420_mRNA |                |                 |
| CELLO prediction:           |                |                 |
| (predictor                  | location       | reliable-index) |
| Composition                 | Extracellular  | 0.735           |
| Di-peptide                  | Nuclear        | 0.358           |
| part-Comp.                  | Extracellular  | 0.396           |
| chemo-typy                  | Mitochondrial  | 0.412           |
| Neighboring                 | Extracellular  | 0.788           |
| Combined SVM classifier:    |                |                 |
|                             | Extracellular  | 2.308 *         |
|                             | PlasmaMembrane | 0.266           |
|                             | Cytoplasmic    | 0.440           |
|                             | Cytoskeletal   | 0.017           |
|                             | ER             | 0.026           |
|                             | Golgi          | 0.021           |
|                             | Lysosomal      | 0.040           |
|                             | Mitochondrial  | 0.653           |
|                             | Chloroplast    | 0.260           |
|                             | Peroxisomal    | 0.028           |
|                             | Vacuole        | 0.017           |
|                             | Nuclear        | 0.923           |

**Table S1.** Subcellular localization of proteins retrieved for TriTypDB database showing >80% homology among *L. infantum*, *L. major* and *L. braziliensis*.

\*\*\*\*\*

\*\*\*\*\*

SeqID: li|LinJ\_36\_3020\_mRNA|

CELLO prediction:

| (predictor  | location      | reliable-index) |
|-------------|---------------|-----------------|
| Composition | Cytoplasmic   | 0.609           |
| Di-peptide  | Mitochondrial | 0.453           |
| part-Comp.  | Cytoplasmic   | 0.512           |
| chemo-typy  | Nuclear       | 0.843           |
| Neighboring | Mitochondrial | 0.550           |

Combined SVM classifier:

|                |         |
|----------------|---------|
| Extracellular  | 0.102   |
| PlasmaMembrane | 0.043   |
| Cytoplasmic    | 1.625 * |
| Cytoskeletal   | 0.012   |
| ER             | 0.024   |
| Golgi          | 0.009   |
| Lysosomal      | 0.010   |
| Mitochondrial  | 1.484 * |
| Chloroplast    | 0.098   |
| Peroxisomal    | 0.093   |
| Vacuole        | 0.014   |
| Nuclear        | 1.486 * |

\*\*\*\*\*

\*\*\*\*\*

SeqID: li|LinJ\_25\_0740\_mRNA|

CELLO prediction:

| (predictor  | location    | reliable-index) |
|-------------|-------------|-----------------|
| Composition | Nuclear     | 0.737           |
| Di-peptide  | Cytoplasmic | 0.459           |
| part-Comp.  | Cytoplasmic | 0.481           |
| chemo-typy  | Cytoplasmic | 0.527           |
| Neighboring | Nuclear     | 0.937           |

Combined SVM classifier:

|                |         |
|----------------|---------|
| Extracellular  | 0.104   |
| PlasmaMembrane | 0.027   |
| Cytoplasmic    | 1.681   |
| Cytoskeletal   | 0.012   |
| ER             | 0.038   |
| Golgi          | 0.176   |
| Lysosomal      | 0.017   |
| Mitochondrial  | 0.155   |
| Chloroplast    | 0.290   |
| Peroxisomal    | 0.046   |
| Vacuole        | 0.024   |
| Nuclear        | 2.431 * |

\*\*\*\*\*

\*\*\*\*\*

SeqID: li|LinJ\_26\_2020\_mRNA|

CELLO prediction:

| (predictor  | location    | reliable-index) |
|-------------|-------------|-----------------|
| Composition | Cytoplasmic | 0.340           |
| Di-peptide  | Nuclear     | 0.705           |
| part-Comp.  | Nuclear     | 0.602           |
| chemo-typy  | Nuclear     | 0.794           |

**Table S1.** Subcellular localization of proteins retrieved for TriTypDB database showing >80% homology among *L. infantum*, *L. major* and *L. braziliensis*.

|                             |             |                |                 |       |
|-----------------------------|-------------|----------------|-----------------|-------|
|                             | Neighboring | Nuclear        | 0.405           |       |
| Combined SVM classifier:    |             |                |                 |       |
|                             |             | Extracellular  | 0.154           |       |
|                             |             | PlasmaMembrane | 0.067           |       |
|                             |             | Cytoplasmic    | 0.813           |       |
|                             |             | Cytoskeletal   | 0.014           |       |
|                             |             | ER             | 0.017           |       |
|                             |             | Golgi          | 0.010           |       |
|                             |             | Lysosomal      |                 | 0.012 |
|                             |             | Mitochondrial  | 0.966           |       |
|                             |             | Chloroplast    | 0.137           |       |
|                             |             | Peroxisomal    | 0.029           |       |
|                             |             | Vacuole        | 0.013           |       |
|                             |             | Nuclear        | 2.768           | *     |
| *****                       |             |                |                 |       |
| *****                       |             |                |                 |       |
| SeqID: li LinJ_35_4570_mRNA |             |                |                 |       |
| CELLO prediction:           |             |                |                 |       |
|                             | (predictor  | location       | reliable-index) |       |
|                             | Composition | Extracellular  | 0.511           |       |
|                             | Di-peptide  | Extracellular  | 0.419           |       |
|                             | part-Comp.  | Extracellular  | 0.335           |       |
|                             | chemo-typy  | Mitochondrial  | 0.476           |       |
|                             | Neighboring | Extracellular  | 0.739           |       |
| Combined SVM classifier:    |             |                |                 |       |
|                             |             | Extracellular  | 2.028           | *     |
|                             |             | PlasmaMembrane | 0.101           |       |
|                             |             | Cytoplasmic    | 0.719           |       |
|                             |             | Cytoskeletal   | 0.014           |       |
|                             |             | ER             | 0.021           |       |
|                             |             | Golgi          | 0.014           |       |
|                             |             | Lysosomal      |                 | 0.022 |
|                             |             | Mitochondrial  | 0.974           |       |
|                             |             | Chloroplast    | 0.262           |       |
|                             |             | Peroxisomal    | 0.025           |       |
|                             |             | Vacuole        | 0.009           |       |
|                             |             | Nuclear        | 0.810           |       |
| *****                       |             |                |                 |       |
| *****                       |             |                |                 |       |
| SeqID: li LinJ_36_3940_mRNA |             |                |                 |       |
| CELLO prediction:           |             |                |                 |       |
|                             | (predictor  | location       | reliable-index) |       |
|                             | Composition | Extracellular  | 0.507           |       |
|                             | Di-peptide  | Nuclear        | 0.683           |       |
|                             | part-Comp.  | Nuclear        | 0.422           |       |
|                             | chemo-typy  | Nuclear        | 0.773           |       |
|                             | Neighboring | Nuclear        | 0.556           |       |
| Combined SVM classifier:    |             |                |                 |       |
|                             |             | Extracellular  | 1.256           |       |
|                             |             | PlasmaMembrane | 0.042           |       |
|                             |             | Cytoplasmic    | 0.460           |       |
|                             |             | Cytoskeletal   | 0.011           |       |
|                             |             | ER             | 0.018           |       |
|                             |             | Golgi          | 0.008           |       |

**Table S1.** Subcellular localization of proteins retrieved for TriTypDB database showing >80% homology among *L. infantum*, *L. major* and *L. braziliensis*.

|                             |                |                 |
|-----------------------------|----------------|-----------------|
|                             | Lysosomal      | 0.030           |
|                             | Mitochondrial  | 0.335           |
|                             | Chloroplast    | 0.169           |
|                             | Peroxisomal    | 0.025           |
|                             | Vacuole        | 0.016           |
|                             | Nuclear        | 2.631 *         |
| *****                       |                |                 |
| *****                       |                |                 |
| SeqID: li LinJ_25_1350_mRNA |                |                 |
| CELLO prediction:           |                |                 |
| (predictor                  | location       | reliable-index) |
| Composition                 | Nuclear        | 0.441           |
| Di-peptide                  | Nuclear        | 0.408           |
| part-Comp.                  | Nuclear        | 0.566           |
| chemo-typy                  | Nuclear        | 0.362           |
| Neighboring                 | Nuclear        | 0.693           |
| Combined SVM classifier:    |                |                 |
|                             | Extracellular  | 0.649           |
|                             | PlasmaMembrane | 0.083           |
|                             | Cytoplasmic    | 0.577           |
|                             | Cytoskeletal   | 0.019           |
|                             | ER             | 0.021           |
|                             | Golgi          | 0.018           |
|                             | Lysosomal      | 0.024           |
|                             | Mitochondrial  | 0.909           |
|                             | Chloroplast    | 0.201           |
|                             | Peroxisomal    | 0.020           |
|                             | Vacuole        | 0.010           |
|                             | Nuclear        | 2.470 *         |
| *****                       |                |                 |
| *****                       |                |                 |
| SeqID: li LinJ_28_0870_mRNA |                |                 |
| CELLO prediction:           |                |                 |
| (predictor                  | location       | reliable-index) |
| Composition                 | Extracellular  | 0.516           |
| Di-peptide                  | Nuclear        | 0.556           |
| part-Comp.                  | Extracellular  | 0.351           |
| chemo-typy                  | Extracellular  | 0.465           |
| Neighboring                 | Extracellular  | 0.525           |
| Combined SVM classifier:    |                |                 |
|                             | Extracellular  | 1.986 *         |
|                             | PlasmaMembrane | 0.186           |
|                             | Cytoplasmic    | 0.758           |
|                             | Cytoskeletal   | 0.015           |
|                             | ER             | 0.036           |
|                             | Golgi          | 0.038           |
|                             | Lysosomal      | 0.058           |
|                             | Mitochondrial  | 0.263           |
|                             | Chloroplast    | 0.317           |
|                             | Peroxisomal    | 0.041           |
|                             | Vacuole        | 0.043           |
|                             | Nuclear        | 1.260           |



**Table S1.** Subcellular localization of proteins retrieved for TriTypDB database showing >80% homology among *L. infantum*, *L. major* and *L. braziliensis*.

\*\*\*\*\*

\*\*\*\*\*

SeqID: li|LinJ\_30\_3270\_mRNA|

CELLO prediction:

| (predictor  | location       | reliable-index) |
|-------------|----------------|-----------------|
| Composition | Mitochondrial  | 0.509           |
| Di-peptide  | Mitochondrial  | 0.739           |
| part-Comp.  | PlasmaMembrane | 0.547           |
| chemo-typy  | Mitochondrial  | 0.721           |
| Neighboring | Extracellular  | 0.329           |

Combined SVM classifier:

|                |         |
|----------------|---------|
| Extracellular  | 0.458   |
| PlasmaMembrane | 0.769   |
| Cytoplasmic    | 0.603   |
| Cytoskeletal   | 0.016   |
| ER             | 0.035   |
| Golgi          | 0.010   |
| Lysosomal      | 0.037   |
| Mitochondrial  | 2.236 * |
| Chloroplast    | 0.521   |
| Peroxisomal    | 0.077   |
| Vacuole        | 0.018   |
| Nuclear        | 0.220   |

\*\*\*\*\*

\*\*\*\*\*

SeqID: li|LinJ\_04\_0950\_mRNA|

CELLO prediction:

| (predictor  | location      | reliable-index) |
|-------------|---------------|-----------------|
| Composition | Nuclear       | 0.318           |
| Di-peptide  | Cytoplasmic   | 0.404           |
| part-Comp.  | Cytoplasmic   | 0.469           |
| chemo-typy  | Cytoplasmic   | 0.414           |
| Neighboring | Mitochondrial | 0.431           |

Combined SVM classifier:

|                |         |
|----------------|---------|
| Extracellular  | 0.045   |
| PlasmaMembrane | 0.025   |
| Cytoplasmic    | 1.963 * |
| Cytoskeletal   | 0.037   |
| ER             | 0.008   |
| Golgi          | 0.008   |
| Lysosomal      | 0.009   |
| Mitochondrial  | 1.718 * |
| Chloroplast    | 0.126   |
| Peroxisomal    | 0.066   |
| Vacuole        | 0.008   |
| Nuclear        | 0.989   |

\*\*\*\*\*

\*\*\*\*\*

SeqID: li|LinJ\_34\_3470\_mRNA|

CELLO prediction:

| (predictor  | location      | reliable-index) |
|-------------|---------------|-----------------|
| Composition | Mitochondrial | 0.899           |
| Di-peptide  | Mitochondrial | 0.833           |
| part-Comp.  | Mitochondrial | 0.759           |
| chemo-typy  | Mitochondrial | 0.422           |

**Table S1.** Subcellular localization of proteins retrieved for TriTypDB database showing >80% homology among *L. infantum*, *L. major* and *L. braziliensis*.

|                             |             |                |                 |       |
|-----------------------------|-------------|----------------|-----------------|-------|
|                             | Neighboring | Mitochondrial  | 0.893           |       |
| Combined SVM classifier:    |             |                |                 |       |
|                             |             | Extracellular  | 0.151           |       |
|                             |             | PlasmaMembrane | 0.015           |       |
|                             |             | Cytoplasmic    | 0.509           |       |
|                             |             | Cytoskeletal   | 0.007           |       |
|                             |             | ER             | 0.016           |       |
|                             |             | Golgi          | 0.004           |       |
|                             |             | Lysosomal      |                 | 0.110 |
|                             |             | Mitochondrial  | 3.806 *         |       |
|                             |             | Chloroplast    | 0.195           |       |
|                             |             | Peroxisomal    | 0.078           |       |
|                             |             | Vacuole        | 0.005           |       |
|                             |             | Nuclear        | 0.104           |       |
| *****                       |             |                |                 |       |
| *****                       |             |                |                 |       |
| SeqID: li LinJ_01_0150_mRNA |             |                |                 |       |
| CELLO prediction:           |             |                |                 |       |
|                             | (predictor  | location       | reliable-index) |       |
|                             | Composition | Mitochondrial  | 0.833           |       |
|                             | Di-peptide  | Mitochondrial  | 0.710           |       |
|                             | part-Comp.  | Mitochondrial  | 0.588           |       |
|                             | chemo-typy  | Extracellular  | 0.300           |       |
|                             | Neighboring | Nuclear        | 0.655           |       |
| Combined SVM classifier:    |             |                |                 |       |
|                             |             | Extracellular  | 0.593           |       |
|                             |             | PlasmaMembrane | 0.102           |       |
|                             |             | Cytoplasmic    | 0.235           |       |
|                             |             | Cytoskeletal   | 0.045           |       |
|                             |             | ER             | 0.015           |       |
|                             |             | Golgi          | 0.023           |       |
|                             |             | Lysosomal      |                 | 0.022 |
|                             |             | Mitochondrial  | 2.539 *         |       |
|                             |             | Chloroplast    | 0.106           |       |
|                             |             | Peroxisomal    | 0.055           |       |
|                             |             | Vacuole        | 0.009           |       |
|                             |             | Nuclear        | 1.256           |       |
| *****                       |             |                |                 |       |
| *****                       |             |                |                 |       |
| SeqID: li LinJ_07_0160_mRNA |             |                |                 |       |
| CELLO prediction:           |             |                |                 |       |
|                             | (predictor  | location       | reliable-index) |       |
|                             | Composition | Extracellular  | 0.521           |       |
|                             | Di-peptide  | Extracellular  | 0.512           |       |
|                             | part-Comp.  | Extracellular  | 0.618           |       |
|                             | chemo-typy  | Mitochondrial  | 0.429           |       |
|                             | Neighboring | Extracellular  | 0.395           |       |
| Combined SVM classifier:    |             |                |                 |       |
|                             |             | Extracellular  | 2.157 *         |       |
|                             |             | PlasmaMembrane | 0.083           |       |
|                             |             | Cytoplasmic    | 0.275           |       |
|                             |             | Cytoskeletal   | 0.010           |       |
|                             |             | ER             | 0.059           |       |
|                             |             | Golgi          | 0.007           |       |

**Table S1.** Subcellular localization of proteins retrieved for TriTypDB database showing >80% homology among *L. infantum*, *L. major* and *L. braziliensis*.

|                             |                |                 |
|-----------------------------|----------------|-----------------|
|                             | Lysosomal      | 0.193           |
|                             | Mitochondrial  | 1.607 *         |
|                             | Chloroplast    | 0.054           |
|                             | Peroxisomal    | 0.115           |
|                             | Vacuole        | 0.018           |
|                             | Nuclear        | 0.423           |
| *****                       |                |                 |
| *****                       |                |                 |
| SeqID: li LinJ_11_1200_mRNA |                |                 |
| CELLO prediction:           |                |                 |
| (predictor                  | location       | reliable-index) |
| Composition                 | Nuclear        | 0.853           |
| Di-peptide                  | Extracellular  | 0.411           |
| part-Comp.                  | Nuclear        | 0.564           |
| chemo-typy                  | Cytoplasmic    | 0.711           |
| Neighboring                 | Cytoplasmic    | 0.402           |
| Combined SVM classifier:    |                |                 |
|                             | Extracellular  | 0.631           |
|                             | PlasmaMembrane | 0.052           |
|                             | Cytoplasmic    | 1.799 *         |
|                             | Cytoskeletal   | 0.044           |
|                             | ER             | 0.019           |
|                             | Golgi          | 0.288           |
|                             | Lysosomal      | 0.005           |
|                             | Mitochondrial  | 0.068           |
|                             | Chloroplast    | 0.138           |
|                             | Peroxisomal    | 0.020           |
|                             | Vacuole        | 0.005           |
|                             | Nuclear        | 1.933 *         |
| *****                       |                |                 |
| *****                       |                |                 |
| SeqID: li LinJ_35_1670_mRNA |                |                 |
| CELLO prediction:           |                |                 |
| (predictor                  | location       | reliable-index) |
| Composition                 | Cytoplasmic    | 0.702           |
| Di-peptide                  | Nuclear        | 0.801           |
| part-Comp.                  | Mitochondrial  | 0.542           |
| chemo-typy                  | Nuclear        | 0.481           |
| Neighboring                 | Nuclear        | 0.641           |
| Combined SVM classifier:    |                |                 |
|                             | Extracellular  | 0.036           |
|                             | PlasmaMembrane | 0.023           |
|                             | Cytoplasmic    | 1.045           |
|                             | Cytoskeletal   | 0.013           |
|                             | ER             | 0.009           |
|                             | Golgi          | 0.007           |
|                             | Lysosomal      | 0.005           |
|                             | Mitochondrial  | 1.283           |
|                             | Chloroplast    | 0.464           |
|                             | Peroxisomal    | 0.022           |
|                             | Vacuole        | 0.006           |
|                             | Nuclear        | 2.087 *         |

**Table S1.** Subcellular localization of proteins retrieved for TriTypDB database showing >80% homology among *L. infantum*, *L. major* and *L. braziliensis*.

\*\*\*\*\*

\*\*\*\*\*

SeqID: li|LinJ\_28\_2040\_mRNA|

CELLO prediction:

| (predictor  | location      | reliable-index) |
|-------------|---------------|-----------------|
| Composition | Extracellular | 0.277           |
| Di-peptide  | Nuclear       | 0.726           |
| part-Comp.  | Mitochondrial | 0.428           |
| chemo-typy  | Cytoplasmic   | 0.331           |
| Neighboring | Nuclear       | 0.408           |

Combined SVM classifier:

|                |         |
|----------------|---------|
| Extracellular  | 0.484   |
| PlasmaMembrane | 0.061   |
| Cytoplasmic    | 0.996   |
| Cytoskeletal   | 0.044   |
| ER             | 0.015   |
| Golgi          | 0.015   |
| Lysosomal      | 0.011   |
| Mitochondrial  | 1.025   |
| Chloroplast    | 0.381   |
| Peroxisomal    | 0.051   |
| Vacuole        | 0.017   |
| Nuclear        | 1.901 * |

\*\*\*\*\*

\*\*\*\*\*

SeqID: li|LinJ\_25\_2590\_mRNA|

CELLO prediction:

| (predictor  | location    | reliable-index) |
|-------------|-------------|-----------------|
| Composition | Chloroplast | 0.473           |
| Di-peptide  | Cytoplasmic | 0.414           |
| part-Comp.  | Cytoplasmic | 0.694           |
| chemo-typy  | Chloroplast | 0.621           |
| Neighboring | Chloroplast | 0.519           |

Combined SVM classifier:

|                |         |
|----------------|---------|
| Extracellular  | 0.301   |
| PlasmaMembrane | 0.057   |
| Cytoplasmic    | 1.839 * |
| Cytoskeletal   | 0.020   |
| ER             | 0.035   |
| Golgi          | 0.115   |
| Lysosomal      | 0.009   |
| Mitochondrial  | 0.356   |
| Chloroplast    | 1.841 * |
| Peroxisomal    | 0.224   |
| Vacuole        | 0.037   |
| Nuclear        | 0.165   |

\*\*\*\*\*

\*\*\*\*\*

SeqID: li|LinJ\_27\_0620\_mRNA|

CELLO prediction:

| (predictor  | location       | reliable-index) |
|-------------|----------------|-----------------|
| Composition | PlasmaMembrane | 0.390           |
| Di-peptide  | Extracellular  | 0.176           |
| part-Comp.  | Golgi          | 0.832           |
| chemo-typy  | Cytoplasmic    | 0.419           |

**Table S1.** Subcellular localization of proteins retrieved for TriTypDB database showing >80% homology among *L. infantum*, *L. major* and *L. braziliensis*.

|                             |             |                |                 |       |
|-----------------------------|-------------|----------------|-----------------|-------|
|                             | Neighboring | Golgi          | 0.230           |       |
| Combined SVM classifier:    |             |                |                 |       |
|                             |             | Extracellular  | 0.410           |       |
|                             |             | PlasmaMembrane | 0.601           |       |
|                             |             | Cytoplasmic    | 0.816           |       |
|                             |             | Cytoskeletal   | 0.020           |       |
|                             |             | ER             | 0.068           |       |
|                             |             | Golgi          | 1.494 *         |       |
|                             |             | Lysosomal      |                 | 0.026 |
|                             |             | Mitochondrial  | 0.404           |       |
|                             |             | Chloroplast    | 0.362           |       |
|                             |             | Peroxisomal    | 0.062           |       |
|                             |             | Vacuole        | 0.060           |       |
|                             |             | Nuclear        | 0.677           |       |
| *****                       |             |                |                 |       |
| *****                       |             |                |                 |       |
| SeqID: li LinJ_35_3990_mRNA |             |                |                 |       |
| CELLO prediction:           |             |                |                 |       |
|                             | (predictor  | location       | reliable-index) |       |
|                             | Composition | Mitochondrial  | 0.712           |       |
|                             | Di-peptide  | Cytoplasmic    | 0.436           |       |
|                             | part-Comp.  | Mitochondrial  | 0.509           |       |
|                             | chemo-typy  | Mitochondrial  | 0.351           |       |
|                             | Neighboring | Cytoplasmic    | 0.517           |       |
| Combined SVM classifier:    |             |                |                 |       |
|                             |             | Extracellular  | 0.047           |       |
|                             |             | PlasmaMembrane | 0.020           |       |
|                             |             | Cytoplasmic    | 1.727 *         |       |
|                             |             | Cytoskeletal   | 0.034           |       |
|                             |             | ER             | 0.040           |       |
|                             |             | Golgi          | 0.010           |       |
|                             |             | Lysosomal      |                 | 0.015 |
|                             |             | Mitochondrial  | 2.160 *         |       |
|                             |             | Chloroplast    | 0.063           |       |
|                             |             | Peroxisomal    | 0.175           |       |
|                             |             | Vacuole        | 0.010           |       |
|                             |             | Nuclear        | 0.699           |       |
| *****                       |             |                |                 |       |
| *****                       |             |                |                 |       |
| SeqID: li LinJ_28_0210_mRNA |             |                |                 |       |
| CELLO prediction:           |             |                |                 |       |
|                             | (predictor  | location       | reliable-index) |       |
|                             | Composition | Cytoplasmic    | 0.546           |       |
|                             | Di-peptide  | Nuclear        | 0.905           |       |
|                             | part-Comp.  | Nuclear        | 0.860           |       |
|                             | chemo-typy  | Nuclear        | 0.823           |       |
|                             | Neighboring | Mitochondrial  | 0.455           |       |
| Combined SVM classifier:    |             |                |                 |       |
|                             |             | Extracellular  | 0.041           |       |
|                             |             | PlasmaMembrane | 0.031           |       |
|                             |             | Cytoplasmic    | 0.682           |       |
|                             |             | Cytoskeletal   | 0.014           |       |
|                             |             | ER             | 0.010           |       |
|                             |             | Golgi          | 0.002           |       |

**Table S1.** Subcellular localization of proteins retrieved for TriTypDB database showing >80% homology among *L. infantum*, *L. major* and *L. braziliensis*.

|                             |                |                 |
|-----------------------------|----------------|-----------------|
|                             | Lysosomal      | 0.003           |
|                             | Mitochondrial  | 0.763           |
|                             | Chloroplast    | 0.041           |
|                             | Peroxisomal    | 0.047           |
|                             | Vacuole        | 0.003           |
|                             | Nuclear        | 3.363 *         |
| *****                       |                |                 |
| *****                       |                |                 |
| SeqID: li LinJ_34_3720_mRNA |                |                 |
| CELLO prediction:           |                |                 |
| (predictor                  | location       | reliable-index) |
| Composition                 | Nuclear        | 0.653           |
| Di-peptide                  | Mitochondrial  | 0.331           |
| part-Comp.                  | Nuclear        | 0.343           |
| chemo-typy                  | Nuclear        | 0.491           |
| Neighboring                 | Nuclear        | 0.691           |
| Combined SVM classifier:    |                |                 |
|                             | Extracellular  | 0.652           |
|                             | PlasmaMembrane | 0.059           |
|                             | Cytoplasmic    | 0.562           |
|                             | Cytoskeletal   | 0.046           |
|                             | ER             | 0.022           |
|                             | Golgi          | 0.016           |
|                             | Lysosomal      | 0.012           |
|                             | Mitochondrial  | 0.878           |
|                             | Chloroplast    | 0.222           |
|                             | Peroxisomal    | 0.029           |
|                             | Vacuole        | 0.020           |
|                             | Nuclear        | 2.481 *         |
| *****                       |                |                 |
| *****                       |                |                 |
| SeqID: li LinJ_09_0030_mRNA |                |                 |
| CELLO prediction:           |                |                 |
| (predictor                  | location       | reliable-index) |
| Composition                 | Mitochondrial  | 0.532           |
| Di-peptide                  | Mitochondrial  | 0.786           |
| part-Comp.                  | Mitochondrial  | 0.517           |
| chemo-typy                  | Nuclear        | 0.384           |
| Neighboring                 | Chloroplast    | 0.318           |
| Combined SVM classifier:    |                |                 |
|                             | Extracellular  | 0.310           |
|                             | PlasmaMembrane | 0.376           |
|                             | Cytoplasmic    | 0.414           |
|                             | Cytoskeletal   | 0.017           |
|                             | ER             | 0.056           |
|                             | Golgi          | 0.011           |
|                             | Lysosomal      | 0.049           |
|                             | Mitochondrial  | 2.366 *         |
|                             | Chloroplast    | 0.626           |
|                             | Peroxisomal    | 0.097           |
|                             | Vacuole        | 0.019           |
|                             | Nuclear        | 0.660           |

**Table S1.** Subcellular localization of proteins retrieved for TriTypDB database showing >80% homology among *L. infantum*, *L. major* and *L. braziliensis*.

\*\*\*\*\*

\*\*\*\*\*

SeqID: li|LinJ\_35\_1540\_mRNA|

CELLO prediction:

| (predictor  | location      | reliable-index) |
|-------------|---------------|-----------------|
| Composition | Chloroplast   | 0.596           |
| Di-peptide  | Nuclear       | 0.613           |
| part-Comp.  | Mitochondrial | 0.530           |
| chemo-typy  | Cytoplasmic   | 0.608           |
| Neighboring | Cytoplasmic   | 0.358           |

Combined SVM classifier:

|                |         |
|----------------|---------|
| Extracellular  | 0.087   |
| PlasmaMembrane | 0.099   |
| Cytoplasmic    | 1.308 * |
| Cytoskeletal   | 0.013   |
| ER             | 0.027   |
| Golgi          | 0.015   |
| Lysosomal      | 0.011   |
| Mitochondrial  | 1.216 * |
| Chloroplast    | 1.157 * |
| Peroxisomal    | 0.180   |
| Vacuole        | 0.019   |
| Nuclear        | 0.867   |

\*\*\*\*\*

\*\*\*\*\*

SeqID: li|LinJ\_08\_1290\_mRNA|

CELLO prediction:

| (predictor  | location    | reliable-index) |
|-------------|-------------|-----------------|
| Composition | Cytoplasmic | 0.501           |
| Di-peptide  | Cytoplasmic | 0.827           |
| part-Comp.  | Cytoplasmic | 0.833           |
| chemo-typy  | Cytoplasmic | 0.673           |
| Neighboring | Cytoplasmic | 0.808           |

Combined SVM classifier:

|                |         |
|----------------|---------|
| Extracellular  | 0.113   |
| PlasmaMembrane | 0.177   |
| Cytoplasmic    | 3.642 * |
| Cytoskeletal   | 0.008   |
| ER             | 0.024   |
| Golgi          | 0.020   |
| Lysosomal      | 0.050   |
| Mitochondrial  | 0.074   |
| Chloroplast    | 0.108   |
| Peroxisomal    | 0.036   |
| Vacuole        | 0.043   |
| Nuclear        | 0.705   |

\*\*\*\*\*

\*\*\*\*\*

SeqID: li|LinJ\_34\_0900\_mRNA|

CELLO prediction:

| (predictor  | location       | reliable-index) |
|-------------|----------------|-----------------|
| Composition | PlasmaMembrane | 0.943           |
| Di-peptide  | PlasmaMembrane | 0.811           |
| part-Comp.  | PlasmaMembrane | 0.390           |
| chemo-typy  | Extracellular  | 0.384           |

**Table S1.** Subcellular localization of proteins retrieved for TriTypDB database showing >80% homology among *L. infantum*, *L. major* and *L. braziliensis*.

|                             |             |                |                 |       |
|-----------------------------|-------------|----------------|-----------------|-------|
|                             | Neighboring | Cytoplasmic    | 0.732           |       |
| Combined SVM classifier:    |             |                |                 |       |
|                             |             | Extracellular  | 0.435           |       |
|                             |             | PlasmaMembrane | 2.226           | *     |
|                             |             | Cytoplasmic    | 1.341           |       |
|                             |             | Cytoskeletal   | 0.005           |       |
|                             |             | ER             | 0.025           |       |
|                             |             | Golgi          | 0.019           |       |
|                             |             | Lysosomal      |                 | 0.020 |
|                             |             | Mitochondrial  | 0.125           |       |
|                             |             | Chloroplast    | 0.213           |       |
|                             |             | Peroxisomal    | 0.062           |       |
|                             |             | Vacuole        | 0.021           |       |
|                             |             | Nuclear        | 0.508           |       |
| *****                       |             |                |                 |       |
| *****                       |             |                |                 |       |
| SeqID: li LinJ_36_1690_mRNA |             |                |                 |       |
| CELLO prediction:           |             |                |                 |       |
|                             | (predictor  | location       | reliable-index) |       |
|                             | Composition | Nuclear        | 0.538           |       |
|                             | Di-peptide  | Nuclear        | 0.499           |       |
|                             | part-Comp.  | Extracellular  | 0.781           |       |
|                             | chemo-typy  | Nuclear        | 0.658           |       |
|                             | Neighboring | Extracellular  | 0.623           |       |
| Combined SVM classifier:    |             |                |                 |       |
|                             |             | Extracellular  | 2.009           | *     |
|                             |             | PlasmaMembrane | 0.094           |       |
|                             |             | Cytoplasmic    | 0.263           |       |
|                             |             | Cytoskeletal   | 0.014           |       |
|                             |             | ER             | 0.016           |       |
|                             |             | Golgi          | 0.008           |       |
|                             |             | Lysosomal      |                 | 0.041 |
|                             |             | Mitochondrial  | 0.245           |       |
|                             |             | Chloroplast    | 0.076           |       |
|                             |             | Peroxisomal    | 0.014           |       |
|                             |             | Vacuole        | 0.012           |       |
|                             |             | Nuclear        | 2.207           | *     |
| *****                       |             |                |                 |       |
| *****                       |             |                |                 |       |
| SeqID: li LinJ_35_5420_mRNA |             |                |                 |       |
| CELLO prediction:           |             |                |                 |       |
|                             | (predictor  | location       | reliable-index) |       |
|                             | Composition | Nuclear        | 0.509           |       |
|                             | Di-peptide  | Nuclear        | 0.863           |       |
|                             | part-Comp.  | Nuclear        | 0.637           |       |
|                             | chemo-typy  | Nuclear        | 0.840           |       |
|                             | Neighboring | Nuclear        | 0.487           |       |
| Combined SVM classifier:    |             |                |                 |       |
|                             |             | Extracellular  | 0.440           |       |
|                             |             | PlasmaMembrane | 0.087           |       |
|                             |             | Cytoplasmic    | 0.367           |       |
|                             |             | Cytoskeletal   | 0.013           |       |
|                             |             | ER             | 0.014           |       |
|                             |             | Golgi          | 0.008           |       |



**Table S1.** Subcellular localization of proteins retrieved for TriTypDB database showing >80% homology among *L. infantum*, *L. major* and *L. braziliensis*.

|                             |                |                 |
|-----------------------------|----------------|-----------------|
|                             | Lysosomal      | 0.011           |
|                             | Mitochondrial  | 0.517           |
|                             | Chloroplast    | 0.170           |
|                             | Peroxisomal    | 0.024           |
|                             | Vacuole        | 0.013           |
|                             | Nuclear        | 3.336 *         |
| *****                       |                |                 |
| *****                       |                |                 |
| SeqID: li LinJ_35_3060_mRNA |                |                 |
| CELLO prediction:           |                |                 |
| (predictor                  | location       | reliable-index) |
| Composition                 | Cytoplasmic    | 0.596           |
| Di-peptide                  | Cytoplasmic    | 0.630           |
| part-Comp.                  | Cytoplasmic    | 0.715           |
| chemo-typy                  | Mitochondrial  | 0.411           |
| Neighboring                 | Cytoplasmic    | 0.538           |
| Combined SVM classifier:    |                |                 |
|                             | Extracellular  | 0.313           |
|                             | PlasmaMembrane | 0.043           |
|                             | Cytoplasmic    | 2.681 *         |
|                             | Cytoskeletal   | 0.011           |
|                             | ER             | 0.197           |
|                             | Golgi          | 0.086           |
|                             | Lysosomal      | 0.020           |
|                             | Mitochondrial  | 0.785           |
|                             | Chloroplast    | 0.508           |
|                             | Peroxisomal    | 0.034           |
|                             | Vacuole        | 0.026           |
|                             | Nuclear        | 0.296           |
| *****                       |                |                 |
| *****                       |                |                 |
| SeqID: li LinJ_25_1460_mRNA |                |                 |
| CELLO prediction:           |                |                 |
| (predictor                  | location       | reliable-index) |
| Composition                 | Cytoplasmic    | 0.551           |
| Di-peptide                  | Cytoplasmic    | 0.644           |
| part-Comp.                  | Cytoplasmic    | 0.353           |
| chemo-typy                  | Nuclear        | 0.537           |
| Neighboring                 | Cytoplasmic    | 0.803           |
| Combined SVM classifier:    |                |                 |
|                             | Extracellular  | 0.171           |
|                             | PlasmaMembrane | 0.214           |
|                             | Cytoplasmic    | 2.506 *         |
|                             | Cytoskeletal   | 0.019           |
|                             | ER             | 0.056           |
|                             | Golgi          | 0.023           |
|                             | Lysosomal      | 0.034           |
|                             | Mitochondrial  | 0.259           |
|                             | Chloroplast    | 0.715           |
|                             | Peroxisomal    | 0.115           |
|                             | Vacuole        | 0.028           |
|                             | Nuclear        | 0.860           |

**Table S1.** Subcellular localization of proteins retrieved for TriTypDB database showing >80% homology among *L. infantum*, *L. major* and *L. braziliensis*.

```

*****
*****
SeqID: li|LinJ_31_1930_mRNA|
      CELLO prediction:
              (predictor      location      reliable-index)
Composition      Mitochondrial    0.496
Di-peptide       Nuclear          0.421
part-Comp.       Nuclear          0.591
chemo-typy       Nuclear          0.646
Neighboring      Extracellular    0.506

      Combined SVM classifier:
                                Extracellular    0.609
                                PlasmaMembrane    0.010
                                Cytoplasmic        0.958
                                Cytoskeletal       0.012
                                ER                  0.009
                                Golgi              0.005
                                Lysosomal          0.004
                                Mitochondrial      0.936
                                Chloroplast        0.152
                                Peroxisomal        0.040
                                Vacuole            0.004
                                Nuclear             2.262 *

*****
*****
SeqID: li|LinJ_30_3710_mRNA|
      CELLO prediction:
              (predictor      location      reliable-index)
Composition      Mitochondrial    0.400
Di-peptide       Mitochondrial    0.935
part-Comp.       Mitochondrial    0.814
chemo-typy       Nuclear          0.914
Neighboring      Mitochondrial    0.610

      Combined SVM classifier:
                                Extracellular    0.067
                                PlasmaMembrane    0.033
                                Cytoplasmic        0.532
                                Cytoskeletal       0.026
                                ER                  0.014
                                Golgi              0.010
                                Lysosomal          0.013
                                Mitochondrial      2.825 *
                                Chloroplast        0.077
                                Peroxisomal        0.075
                                Vacuole            0.015
                                Nuclear             1.312

*****
*****
SeqID: li|LinJ_14_0530_mRNA|
      CELLO prediction:
              (predictor      location      reliable-index)
Composition      Chloroplast      0.279
Di-peptide       Mitochondrial    0.384
part-Comp.       Cytoplasmic      0.414
chemo-typy       Nuclear          0.365

```

**Table S1.** Subcellular localization of proteins retrieved for TriTypDB database showing >80% homology among *L. infantum*, *L. major* and *L. braziliensis*.

NeighboringMitochondrial0.390

Combined SVM classifier:

Extracellular0.443

PlasmaMembrane0.047

Cytoplasmic1.151 \*

Cytoskeletal0.037

ER0.036

Golgi0.029

Lysosomal0.013

Mitochondrial1.219 \*

Chloroplast0.733

Peroxisomal0.058

Vacuole0.105

Nuclear1.128 \*

\*\*\*\*\*

\*\*\*\*\*

SeqID: li|LinJ\_24\_0730\_mRNA|

CELLO prediction:

(predictorlocationreliable-index)

CompositionNuclear0.511

Di-peptideMitochondrial0.379

part-Comp.Nuclear0.504

chemo-typyMitochondrial0.463

NeighboringNuclear0.385

Combined SVM classifier:

Extracellular0.617

PlasmaMembrane0.123

Cytoplasmic0.785

Cytoskeletal0.041

ER0.027

Golgi0.020

Lysosomal0.027

Mitochondrial1.102 \*

Chloroplast0.486

Peroxisomal0.071

Vacuole0.027

Nuclear1.675 \*

\*\*\*\*\*

\*\*\*\*\*

SeqID: li|LinJ\_20\_1350\_mRNA|

CELLO prediction:

(predictorlocationreliable-index)

CompositionCytoplasmic0.518

Di-peptideCytoplasmic0.291

part-Comp.Cytoplasmic0.550

chemo-typyNuclear0.604

NeighboringCytoplasmic0.602

Combined SVM classifier:

Extracellular0.288

PlasmaMembrane0.045

Cytoplasmic2.054 \*

Cytoskeletal0.017

ER0.081

Golqi0.034

**Table S1.** Subcellular localization of proteins retrieved for TriTypDB database showing >80% homology among *L. infantum*, *L. major* and *L. braziliensis*.

|                             |                |                 |
|-----------------------------|----------------|-----------------|
|                             | Lysosomal      | 0.027           |
|                             | Mitochondrial  | 0.273           |
|                             | Chloroplast    | 0.525           |
|                             | Peroxisomal    | 0.028           |
|                             | Vacuole        | 0.038           |
|                             | Nuclear        | 1.588 *         |
| *****                       |                |                 |
| *****                       |                |                 |
| SeqID: li LinJ_15_1530_mRNA |                |                 |
| CELLO prediction:           |                |                 |
| (predictor                  | location       | reliable-index) |
| Composition                 | Chloroplast    | 0.459           |
| Di-peptide                  | Chloroplast    | 0.725           |
| part-Comp.                  | Cytoplasmic    | 0.575           |
| chemo-typy                  | Cytoplasmic    | 0.583           |
| Neighboring                 | Nuclear        | 0.367           |
| Combined SVM classifier:    |                |                 |
|                             | Extracellular  | 0.493           |
|                             | PlasmaMembrane | 0.135           |
|                             | Cytoplasmic    | 1.487 *         |
|                             | Cytoskeletal   | 0.019           |
|                             | ER             | 0.023           |
|                             | Golgi          | 0.165           |
|                             | Lysosomal      | 0.013           |
|                             | Mitochondrial  | 0.346           |
|                             | Chloroplast    | 1.564 *         |
|                             | Peroxisomal    | 0.150           |
|                             | Vacuole        | 0.013           |
|                             | Nuclear        | 0.592           |
| *****                       |                |                 |
| *****                       |                |                 |
| SeqID: li LinJ_34_0980_mRNA |                |                 |
| CELLO prediction:           |                |                 |
| (predictor                  | location       | reliable-index) |
| Composition                 | Cytoplasmic    | 0.355           |
| Di-peptide                  | Nuclear        | 0.312           |
| part-Comp.                  | Mitochondrial  | 0.392           |
| chemo-typy                  | Mitochondrial  | 0.520           |
| Neighboring                 | Cytoplasmic    | 0.557           |
| Combined SVM classifier:    |                |                 |
|                             | Extracellular  | 0.349           |
|                             | PlasmaMembrane | 0.036           |
|                             | Cytoplasmic    | 1.602 *         |
|                             | Cytoskeletal   | 0.027           |
|                             | ER             | 0.026           |
|                             | Golgi          | 0.023           |
|                             | Lysosomal      | 0.009           |
|                             | Mitochondrial  | 1.633 *         |
|                             | Chloroplast    | 0.236           |
|                             | Peroxisomal    | 0.059           |
|                             | Vacuole        | 0.023           |
|                             | Nuclear        | 0.976           |

**Table S1.** Subcellular localization of proteins retrieved for TriTypDB database showing >80% homology among *L. infantum*, *L. major* and *L. braziliensis*.

\*\*\*\*\*

\*\*\*\*\*

SeqID: li|LinJ\_31\_2650\_mRNA|

CELLO prediction:

| (predictor  | location      | reliable-index) |
|-------------|---------------|-----------------|
| Composition | Extracellular | 0.900           |
| Di-peptide  | Cytoplasmic   | 0.292           |
| part-Comp.  | Extracellular | 0.780           |
| chemo-typy  | Cytoplasmic   | 0.421           |
| Neighboring | Extracellular | 0.520           |

Combined SVM classifier:

|                |       |       |
|----------------|-------|-------|
| Extracellular  | 2.489 | *     |
| PlasmaMembrane | 0.037 |       |
| Cytoplasmic    | 0.928 |       |
| Cytoskeletal   | 0.012 |       |
| ER             | 0.017 |       |
| Golgi          | 0.012 |       |
| Lysosomal      |       | 0.035 |
| Mitochondrial  | 0.557 |       |
| Chloroplast    | 0.233 |       |
| Peroxisomal    | 0.028 |       |
| Vacuole        | 0.006 |       |
| Nuclear        | 0.646 |       |

\*\*\*\*\*

\*\*\*\*\*

SeqID: li|LinJ\_09\_1130\_mRNA|

CELLO prediction:

| (predictor  | location      | reliable-index) |
|-------------|---------------|-----------------|
| Composition | Cytoplasmic   | 0.691           |
| Di-peptide  | Mitochondrial | 0.470           |
| part-Comp.  | Cytoplasmic   | 0.860           |
| chemo-typy  | Cytoplasmic   | 0.507           |
| Neighboring | Nuclear       | 0.315           |

Combined SVM classifier:

|                |       |       |
|----------------|-------|-------|
| Extracellular  | 0.078 |       |
| PlasmaMembrane | 0.228 |       |
| Cytoplasmic    | 2.391 | *     |
| Cytoskeletal   | 0.009 |       |
| ER             | 0.019 |       |
| Golgi          | 0.065 |       |
| Lysosomal      |       | 0.027 |
| Mitochondrial  | 0.835 |       |
| Chloroplast    | 0.471 |       |
| Peroxisomal    | 0.156 |       |
| Vacuole        | 0.016 |       |
| Nuclear        | 0.705 |       |

\*\*\*\*\*

\*\*\*\*\*

SeqID: li|LinJ\_04\_0930\_mRNA|

CELLO prediction:

| (predictor  | location      | reliable-index) |
|-------------|---------------|-----------------|
| Composition | Cytoplasmic   | 0.305           |
| Di-peptide  | Mitochondrial | 0.445           |
| part-Comp.  | Nuclear       | 0.523           |
| chemo-typy  | Nuclear       | 0.558           |

**Table S1.** Subcellular localization of proteins retrieved for TriTypDB database showing >80% homology among *L. infantum*, *L. major* and *L. braziliensis*.

|                             |             |                |                 |       |
|-----------------------------|-------------|----------------|-----------------|-------|
|                             | Neighboring | Nuclear        | 0.596           |       |
| Combined SVM classifier:    |             |                |                 |       |
|                             |             | Extracellular  | 0.189           |       |
|                             |             | PlasmaMembrane | 0.027           |       |
|                             |             | Cytoplasmic    | 1.243           |       |
|                             |             | Cytoskeletal   | 0.014           |       |
|                             |             | ER             | 0.010           |       |
|                             |             | Golgi          | 0.008           |       |
|                             |             | Lysosomal      |                 | 0.007 |
|                             |             | Mitochondrial  | 1.033           |       |
|                             |             | Chloroplast    | 0.388           |       |
|                             |             | Peroxisomal    | 0.019           |       |
|                             |             | Vacuole        | 0.006           |       |
|                             |             | Nuclear        | 2.056           | *     |
| *****                       |             |                |                 |       |
| *****                       |             |                |                 |       |
| SeqID: li LinJ_30_2760_mRNA |             |                |                 |       |
| CELLO prediction:           |             |                |                 |       |
|                             | (predictor  | location       | reliable-index) |       |
|                             | Composition | Nuclear        | 0.362           |       |
|                             | Di-peptide  | Mitochondrial  | 0.380           |       |
|                             | part-Comp.  | Nuclear        | 0.434           |       |
|                             | chemo-typy  | Mitochondrial  | 0.457           |       |
|                             | Neighboring | Nuclear        | 0.372           |       |
| Combined SVM classifier:    |             |                |                 |       |
|                             |             | Extracellular  | 0.482           |       |
|                             |             | PlasmaMembrane | 0.115           |       |
|                             |             | Cytoplasmic    | 0.785           |       |
|                             |             | Cytoskeletal   | 0.022           |       |
|                             |             | ER             | 0.021           |       |
|                             |             | Golgi          | 0.012           |       |
|                             |             | Lysosomal      |                 | 0.012 |
|                             |             | Mitochondrial  | 1.284           | *     |
|                             |             | Chloroplast    | 0.378           |       |
|                             |             | Peroxisomal    | 0.028           |       |
|                             |             | Vacuole        | 0.015           |       |
|                             |             | Nuclear        | 1.845           | *     |
| *****                       |             |                |                 |       |
| *****                       |             |                |                 |       |
| SeqID: li LinJ_03_0940_mRNA |             |                |                 |       |
| CELLO prediction:           |             |                |                 |       |
|                             | (predictor  | location       | reliable-index) |       |
|                             | Composition | Mitochondrial  | 0.357           |       |
|                             | Di-peptide  | Mitochondrial  | 0.351           |       |
|                             | part-Comp.  | Extracellular  | 0.291           |       |
|                             | chemo-typy  | Chloroplast    | 0.347           |       |
|                             | Neighboring | Extracellular  | 0.888           |       |
| Combined SVM classifier:    |             |                |                 |       |
|                             |             | Extracellular  | 1.628           | *     |
|                             |             | PlasmaMembrane | 0.401           |       |
|                             |             | Cytoplasmic    | 0.518           |       |
|                             |             | Cytoskeletal   | 0.018           |       |
|                             |             | ER             | 0.031           |       |
|                             |             | Golgi          | 0.032           |       |

**Table S1.** Subcellular localization of proteins retrieved for TriTypDB database showing >80% homology among *L. infantum*, *L. major* and *L. braziliensis*.

|                             |                |                 |
|-----------------------------|----------------|-----------------|
|                             | Lysosomal      | 0.094           |
|                             | Mitochondrial  | 1.155 *         |
|                             | Chloroplast    | 0.666           |
|                             | Peroxisomal    | 0.072           |
|                             | Vacuole        | 0.015           |
|                             | Nuclear        | 0.370           |
| *****                       |                |                 |
| *****                       |                |                 |
| SeqID: li LinJ_05_0070_mRNA |                |                 |
| CELLO prediction:           |                |                 |
| (predictor                  | location       | reliable-index) |
| Composition                 | PlasmaMembrane | 0.401           |
| Di-peptide                  | Chloroplast    | 0.341           |
| part-Comp.                  | Cytoplasmic    | 0.431           |
| chemo-typy                  | Mitochondrial  | 0.370           |
| Neighboring                 | Nuclear        | 0.510           |
| Combined SVM classifier:    |                |                 |
|                             | Extracellular  | 0.280           |
|                             | PlasmaMembrane | 0.559           |
|                             | Cytoplasmic    | 1.395 *         |
|                             | Cytoskeletal   | 0.015           |
|                             | ER             | 0.028           |
|                             | Golgi          | 0.042           |
|                             | Lysosomal      | 0.038           |
|                             | Mitochondrial  | 0.929           |
|                             | Chloroplast    | 0.632           |
|                             | Peroxisomal    | 0.047           |
|                             | Vacuole        | 0.017           |
|                             | Nuclear        | 1.018 *         |
| *****                       |                |                 |
| *****                       |                |                 |
| SeqID: li LinJ_36_3530_mRNA |                |                 |
| CELLO prediction:           |                |                 |
| (predictor                  | location       | reliable-index) |
| Composition                 | Mitochondrial  | 0.741           |
| Di-peptide                  | Mitochondrial  | 0.450           |
| part-Comp.                  | Mitochondrial  | 0.446           |
| chemo-typy                  | Mitochondrial  | 0.645           |
| Neighboring                 | Mitochondrial  | 0.458           |
| Combined SVM classifier:    |                |                 |
|                             | Extracellular  | 0.090           |
|                             | PlasmaMembrane | 0.015           |
|                             | Cytoplasmic    | 0.439           |
|                             | Cytoskeletal   | 0.040           |
|                             | ER             | 0.008           |
|                             | Golgi          | 0.022           |
|                             | Lysosomal      | 0.006           |
|                             | Mitochondrial  | 2.740 *         |
|                             | Chloroplast    | 0.295           |
|                             | Peroxisomal    | 0.030           |
|                             | Vacuole        | 0.007           |
|                             | Nuclear        | 1.307           |

**Table S1.** Subcellular localization of proteins retrieved for TriTypDB database showing >80% homology among *L. infantum*, *L. major* and *L. braziliensis*.

\*\*\*\*\*

\*\*\*\*\*

SeqID: li|LinJ\_27\_1140\_mRNA|

CELLO prediction:

| (predictor  | location      | reliable-index) |
|-------------|---------------|-----------------|
| Composition | Cytoplasmic   | 0.460           |
| Di-peptide  | Cytoplasmic   | 0.695           |
| part-Comp.  | Chloroplast   | 0.235           |
| chemo-typy  | Extracellular | 0.314           |
| Neighboring | Cytoplasmic   | 0.532           |

Combined SVM classifier:

|                |         |
|----------------|---------|
| Extracellular  | 0.956   |
| PlasmaMembrane | 0.260   |
| Cytoplasmic    | 2.080 * |
| Cytoskeletal   | 0.019   |
| ER             | 0.074   |
| Golgi          | 0.045   |
| Lysosomal      | 0.133   |
| Mitochondrial  | 0.221   |
| Chloroplast    | 0.558   |
| Peroxisomal    | 0.307   |
| Vacuole        | 0.076   |
| Nuclear        | 0.269   |

\*\*\*\*\*

\*\*\*\*\*

SeqID: li|LinJ\_21\_2240\_mRNA|

CELLO prediction:

| (predictor  | location    | reliable-index) |
|-------------|-------------|-----------------|
| Composition | Cytoplasmic | 0.475           |
| Di-peptide  | Cytoplasmic | 0.813           |
| part-Comp.  | Cytoplasmic | 0.791           |
| chemo-typy  | Cytoplasmic | 0.627           |
| Neighboring | Cytoplasmic | 0.785           |

Combined SVM classifier:

|                |         |
|----------------|---------|
| Extracellular  | 0.126   |
| PlasmaMembrane | 0.242   |
| Cytoplasmic    | 3.491 * |
| Cytoskeletal   | 0.009   |
| ER             | 0.028   |
| Golgi          | 0.021   |
| Lysosomal      | 0.054   |
| Mitochondrial  | 0.082   |
| Chloroplast    | 0.112   |
| Peroxisomal    | 0.041   |
| Vacuole        | 0.054   |
| Nuclear        | 0.739   |

\*\*\*\*\*

\*\*\*\*\*

SeqID: li|LinJ\_30\_2860\_mRNA|

CELLO prediction:

| (predictor  | location       | reliable-index) |
|-------------|----------------|-----------------|
| Composition | PlasmaMembrane | 0.444           |
| Di-peptide  | Extracellular  | 0.407           |
| part-Comp.  | Extracellular  | 0.471           |
| chemo-typy  | PlasmaMembrane | 0.420           |



**Table S1.** Subcellular localization of proteins retrieved for TriTypDB database showing >80% homology among *L. infantum*, *L. major* and *L. braziliensis*.

|                             |                |                 |       |
|-----------------------------|----------------|-----------------|-------|
| Neighboring                 | PlasmaMembrane | 0.367           |       |
| Combined SVM classifier:    |                |                 |       |
|                             | Extracellular  | 1.466           | *     |
|                             | PlasmaMembrane | 1.621           | *     |
|                             | Cytoplasmic    | 0.098           |       |
|                             | Cytoskeletal   | 0.013           |       |
|                             | ER             | 0.036           |       |
|                             | Golgi          | 0.020           |       |
|                             | Lysosomal      |                 | 0.068 |
|                             | Mitochondrial  | 0.567           |       |
|                             | Chloroplast    | 0.667           |       |
|                             | Peroxisomal    | 0.042           |       |
|                             | Vacuole        | 0.017           |       |
|                             | Nuclear        | 0.384           |       |
| *****                       |                |                 |       |
| *****                       |                |                 |       |
| SeqID: li LinJ_11_0970_mRNA |                |                 |       |
| CELLO prediction:           |                |                 |       |
| (predictor                  | location       | reliable-index) |       |
| Composition                 | Chloroplast    | 0.446           |       |
| Di-peptide                  | Nuclear        | 0.397           |       |
| part-Comp.                  | Mitochondrial  | 0.696           |       |
| chemo-typy                  | Mitochondrial  | 0.452           |       |
| Neighboring                 | Chloroplast    | 0.284           |       |
| Combined SVM classifier:    |                |                 |       |
|                             | Extracellular  | 0.131           |       |
|                             | PlasmaMembrane | 0.022           |       |
|                             | Cytoplasmic    | 0.852           |       |
|                             | Cytoskeletal   | 0.025           |       |
|                             | ER             | 0.035           |       |
|                             | Golgi          | 0.022           |       |
|                             | Lysosomal      |                 | 0.019 |
|                             | Mitochondrial  | 1.800           | *     |
|                             | Chloroplast    | 1.019           |       |
|                             | Peroxisomal    | 0.055           |       |
|                             | Vacuole        | 0.024           |       |
|                             | Nuclear        | 0.996           |       |
| *****                       |                |                 |       |
| *****                       |                |                 |       |
| SeqID: li LinJ_32_0930_mRNA |                |                 |       |
| CELLO prediction:           |                |                 |       |
| (predictor                  | location       | reliable-index) |       |
| Composition                 | Mitochondrial  | 0.361           |       |
| Di-peptide                  | Mitochondrial  | 0.412           |       |
| part-Comp.                  | Nuclear        | 0.348           |       |
| chemo-typy                  | Cytoplasmic    | 0.362           |       |
| Neighboring                 | Nuclear        | 0.568           |       |
| Combined SVM classifier:    |                |                 |       |
|                             | Extracellular  | 0.258           |       |
|                             | PlasmaMembrane | 0.046           |       |
|                             | Cytoplasmic    | 0.947           |       |
|                             | Cytoskeletal   | 0.024           |       |
|                             | ER             | 0.034           |       |
|                             | Golgi          | 0.018           |       |

**Table S1.** Subcellular localization of proteins retrieved for TriTypDB database showing >80% homology among *L. infantum*, *L. major* and *L. braziliensis*.

|                             |                |                 |
|-----------------------------|----------------|-----------------|
|                             | Lysosomal      | 0.027           |
|                             | Mitochondrial  | 1.531 *         |
|                             | Chloroplast    | 0.342           |
|                             | Peroxisomal    | 0.163           |
|                             | Vacuole        | 0.020           |
|                             | Nuclear        | 1.591 *         |
| *****                       |                |                 |
| *****                       |                |                 |
| SeqID: li LinJ_34_2080_mRNA |                |                 |
| CELLO prediction:           |                |                 |
| (predictor                  | location       | reliable-index) |
| Composition                 | Nuclear        | 0.407           |
| Di-peptide                  | Nuclear        | 0.441           |
| part-Comp.                  | Extracellular  | 0.554           |
| chemo-typy                  | Nuclear        | 0.463           |
| Neighboring                 | Mitochondrial  | 0.333           |
| Combined SVM classifier:    |                |                 |
|                             | Extracellular  | 1.162 *         |
|                             | PlasmaMembrane | 0.042           |
|                             | Cytoplasmic    | 0.405           |
|                             | Cytoskeletal   | 0.012           |
|                             | ER             | 0.016           |
|                             | Golgi          | 0.007           |
|                             | Lysosomal      | 0.011           |
|                             | Mitochondrial  | 1.531 *         |
|                             | Chloroplast    | 0.138           |
|                             | Peroxisomal    | 0.036           |
|                             | Vacuole        | 0.009           |
|                             | Nuclear        | 1.630 *         |
| *****                       |                |                 |
| *****                       |                |                 |
| SeqID: li LinJ_32_2860_mRNA |                |                 |
| CELLO prediction:           |                |                 |
| (predictor                  | location       | reliable-index) |
| Composition                 | Extracellular  | 0.709           |
| Di-peptide                  | Extracellular  | 0.390           |
| part-Comp.                  | Extracellular  | 0.303           |
| chemo-typy                  | Extracellular  | 0.483           |
| Neighboring                 | Extracellular  | 0.323           |
| Combined SVM classifier:    |                |                 |
|                             | Extracellular  | 2.209 *         |
|                             | PlasmaMembrane | 0.410           |
|                             | Cytoplasmic    | 0.770           |
|                             | Cytoskeletal   | 0.015           |
|                             | ER             | 0.040           |
|                             | Golgi          | 0.140           |
|                             | Lysosomal      | 0.051           |
|                             | Mitochondrial  | 0.222           |
|                             | Chloroplast    | 0.275           |
|                             | Peroxisomal    | 0.106           |
|                             | Vacuole        | 0.049           |
|                             | Nuclear        | 0.713           |

**Table S1.** Subcellular localization of proteins retrieved for TriTypDB database showing >80% homology among *L. infantum*, *L. major* and *L. braziliensis*.

\*\*\*\*\*

\*\*\*\*\*

SeqID: li|LinJ\_35\_1750\_mRNA|

CELLO prediction:

| (predictor  | location       | reliable-index) |
|-------------|----------------|-----------------|
| Composition | PlasmaMembrane | 0.968           |
| Di-peptide  | Mitochondrial  | 0.666           |
| part-Comp.  | PlasmaMembrane | 0.651           |
| chemo-typy  | PlasmaMembrane | 0.408           |
| Neighboring | PlasmaMembrane | 0.463           |

Combined SVM classifier:

|                |       |       |
|----------------|-------|-------|
| Extracellular  | 0.138 |       |
| PlasmaMembrane | 2.545 | *     |
| Cytoplasmic    | 0.253 |       |
| Cytoskeletal   | 0.006 |       |
| ER             | 0.025 |       |
| Golgi          | 0.009 |       |
| Lysosomal      |       | 0.074 |
| Mitochondrial  | 1.279 |       |
| Chloroplast    | 0.545 |       |
| Peroxisomal    | 0.026 |       |
| Vacuole        | 0.028 |       |
| Nuclear        | 0.071 |       |

\*\*\*\*\*

\*\*\*\*\*

SeqID: li|LinJ\_35\_1380\_mRNA|

CELLO prediction:

| (predictor  | location      | reliable-index) |
|-------------|---------------|-----------------|
| Composition | Extracellular | 0.923           |
| Di-peptide  | Nuclear       | 0.386           |
| part-Comp.  | Mitochondrial | 0.445           |
| chemo-typy  | Nuclear       | 0.424           |
| Neighboring | Extracellular | 0.927           |

Combined SVM classifier:

|                |       |       |
|----------------|-------|-------|
| Extracellular  | 2.273 | *     |
| PlasmaMembrane | 0.032 |       |
| Cytoplasmic    | 0.353 |       |
| Cytoskeletal   | 0.010 |       |
| ER             | 0.017 |       |
| Golgi          | 0.010 |       |
| Lysosomal      |       | 0.026 |
| Mitochondrial  | 1.094 |       |
| Chloroplast    | 0.096 |       |
| Peroxisomal    | 0.040 |       |
| Vacuole        | 0.015 |       |
| Nuclear        | 1.032 |       |

\*\*\*\*\*

\*\*\*\*\*

SeqID: li|LinJ\_33\_1430\_mRNA|

CELLO prediction:

| (predictor  | location      | reliable-index) |
|-------------|---------------|-----------------|
| Composition | Mitochondrial | 0.820           |
| Di-peptide  | Mitochondrial | 0.610           |
| part-Comp.  | Nuclear       | 0.323           |
| chemo-typy  | Nuclear       | 0.422           |

**Table S1.** Subcellular localization of proteins retrieved for TriTypDB database showing >80% homology among *L. infantum*, *L. major* and *L. braziliensis*.

|                             |             |                |                 |       |
|-----------------------------|-------------|----------------|-----------------|-------|
|                             | Neighboring | Mitochondrial  | 0.496           |       |
| Combined SVM classifier:    |             |                |                 |       |
|                             |             | Extracellular  | 0.187           |       |
|                             |             | PlasmaMembrane | 0.218           |       |
|                             |             | Cytoplasmic    | 0.917           |       |
|                             |             | Cytoskeletal   | 0.013           |       |
|                             |             | ER             | 0.031           |       |
|                             |             | Golgi          | 0.031           |       |
|                             |             | Lysosomal      |                 | 0.027 |
|                             |             | Mitochondrial  | 2.208           | *     |
|                             |             | Chloroplast    | 0.247           |       |
|                             |             | Peroxisomal    | 0.188           |       |
|                             |             | Vacuole        | 0.015           |       |
|                             |             | Nuclear        | 0.919           |       |
| *****                       |             |                |                 |       |
| *****                       |             |                |                 |       |
| SeqID: li LinJ_28_1120_mRNA |             |                |                 |       |
| CELLO prediction:           |             |                |                 |       |
|                             | (predictor  | location       | reliable-index) |       |
|                             | Composition | Mitochondrial  | 0.495           |       |
|                             | Di-peptide  | Nuclear        | 0.604           |       |
|                             | part-Comp.  | Mitochondrial  | 0.611           |       |
|                             | chemo-typy  | Nuclear        | 0.361           |       |
|                             | Neighboring | Mitochondrial  | 0.521           |       |
| Combined SVM classifier:    |             |                |                 |       |
|                             |             | Extracellular  | 0.164           |       |
|                             |             | PlasmaMembrane | 0.049           |       |
|                             |             | Cytoplasmic    | 0.684           |       |
|                             |             | Cytoskeletal   | 0.013           |       |
|                             |             | ER             | 0.014           |       |
|                             |             | Golgi          | 0.014           |       |
|                             |             | Lysosomal      |                 | 0.009 |
|                             |             | Mitochondrial  | 1.952           | *     |
|                             |             | Chloroplast    | 0.469           |       |
|                             |             | Peroxisomal    | 0.069           |       |
|                             |             | Vacuole        | 0.007           |       |
|                             |             | Nuclear        | 1.556           | *     |
| *****                       |             |                |                 |       |
| *****                       |             |                |                 |       |
| SeqID: li LinJ_11_0570_mRNA |             |                |                 |       |
| CELLO prediction:           |             |                |                 |       |
|                             | (predictor  | location       | reliable-index) |       |
|                             | Composition | Extracellular  | 0.358           |       |
|                             | Di-peptide  | Mitochondrial  | 0.687           |       |
|                             | part-Comp.  | Mitochondrial  | 0.319           |       |
|                             | chemo-typy  | Nuclear        | 0.643           |       |
|                             | Neighboring | Extracellular  | 0.639           |       |
| Combined SVM classifier:    |             |                |                 |       |
|                             |             | Extracellular  | 1.123           | *     |
|                             |             | PlasmaMembrane | 0.647           |       |
|                             |             | Cytoplasmic    | 0.276           |       |
|                             |             | Cytoskeletal   | 0.014           |       |
|                             |             | ER             | 0.144           |       |
|                             |             | Golgi          | 0.012           |       |

**Table S1.** Subcellular localization of proteins retrieved for TriTypDB database showing >80% homology among *L. infantum*, *L. major* and *L. braziliensis*.

|                             |                |                 |
|-----------------------------|----------------|-----------------|
|                             | Lysosomal      | 0.152           |
|                             | Mitochondrial  | 1.476 *         |
|                             | Chloroplast    | 0.291           |
|                             | Peroxisomal    | 0.061           |
|                             | Vacuole        | 0.036           |
|                             | Nuclear        | 0.769           |
| *****                       |                |                 |
| *****                       |                |                 |
| SeqID: li LinJ_35_2230_mRNA |                |                 |
| CELLO prediction:           |                |                 |
| (predictor                  | location       | reliable-index) |
| Composition                 | Mitochondrial  | 0.363           |
| Di-peptide                  | Chloroplast    | 0.368           |
| part-Comp.                  | Mitochondrial  | 0.434           |
| chemo-typy                  | Extracellular  | 0.535           |
| Neighboring                 | Cytoplasmic    | 0.426           |
| Combined SVM classifier:    |                |                 |
|                             | Extracellular  | 0.649           |
|                             | PlasmaMembrane | 0.028           |
|                             | Cytoplasmic    | 1.343 *         |
|                             | Cytoskeletal   | 0.015           |
|                             | ER             | 0.026           |
|                             | Golgi          | 0.015           |
|                             | Lysosomal      | 0.015           |
|                             | Mitochondrial  | 1.329 *         |
|                             | Chloroplast    | 0.961           |
|                             | Peroxisomal    | 0.129           |
|                             | Vacuole        | 0.019           |
|                             | Nuclear        | 0.473           |
| *****                       |                |                 |
| *****                       |                |                 |
| SeqID: li LinJ_36_5660_mRNA |                |                 |
| CELLO prediction:           |                |                 |
| (predictor                  | location       | reliable-index) |
| Composition                 | Nuclear        | 0.476           |
| Di-peptide                  | Cytoplasmic    | 0.749           |
| part-Comp.                  | Cytoplasmic    | 0.335           |
| chemo-typy                  | Cytoplasmic    | 0.505           |
| Neighboring                 | Cytoplasmic    | 0.526           |
| Combined SVM classifier:    |                |                 |
|                             | Extracellular  | 0.141           |
|                             | PlasmaMembrane | 0.032           |
|                             | Cytoplasmic    | 2.366 *         |
|                             | Cytoskeletal   | 0.162           |
|                             | ER             | 0.050           |
|                             | Golgi          | 0.055           |
|                             | Lysosomal      | 0.009           |
|                             | Mitochondrial  | 0.360           |
|                             | Chloroplast    | 0.279           |
|                             | Peroxisomal    | 0.099           |
|                             | Vacuole        | 0.066           |
|                             | Nuclear        | 1.382           |

**Table S1.** Subcellular localization of proteins retrieved for TriTypDB database showing >80% homology among *L. infantum*, *L. major* and *L. braziliensis*.

\*\*\*\*\*

\*\*\*\*\*

SeqID: li|LinJ\_27\_2070\_mRNA|

CELLO prediction:

| (predictor  | location      | reliable-index) |
|-------------|---------------|-----------------|
| Composition | Extracellular | 0.332           |
| Di-peptide  | Mitochondrial | 0.566           |
| part-Comp.  | Nuclear       | 0.339           |
| chemo-typy  | Chloroplast   | 0.344           |
| Neighboring | Extracellular | 0.654           |

Combined SVM classifier:

|                |       |       |
|----------------|-------|-------|
| Extracellular  | 1.235 | *     |
| PlasmaMembrane | 0.183 |       |
| Cytoplasmic    | 0.503 |       |
| Cytoskeletal   | 0.014 |       |
| ER             | 0.028 |       |
| Golgi          | 0.017 |       |
| Lysosomal      |       | 0.036 |
| Mitochondrial  | 1.422 | *     |
| Chloroplast    | 0.687 |       |
| Peroxisomal    | 0.036 |       |
| Vacuole        | 0.023 |       |
| Nuclear        | 0.816 |       |

\*\*\*\*\*

\*\*\*\*\*

SeqID: li|LinJ\_31\_0960\_mRNA|

CELLO prediction:

| (predictor  | location       | reliable-index) |
|-------------|----------------|-----------------|
| Composition | Mitochondrial  | 0.273           |
| Di-peptide  | Extracellular  | 0.268           |
| part-Comp.  | Chloroplast    | 0.522           |
| chemo-typy  | PlasmaMembrane | 0.477           |
| Neighboring | Extracellular  | 0.299           |

Combined SVM classifier:

|                |       |       |
|----------------|-------|-------|
| Extracellular  | 1.358 | *     |
| PlasmaMembrane | 0.858 |       |
| Cytoplasmic    | 0.612 |       |
| Cytoskeletal   | 0.015 |       |
| ER             | 0.067 |       |
| Golgi          | 0.022 |       |
| Lysosomal      |       | 0.022 |
| Mitochondrial  | 0.579 |       |
| Chloroplast    | 1.110 | *     |
| Peroxisomal    | 0.049 |       |
| Vacuole        | 0.032 |       |
| Nuclear        | 0.276 |       |

\*\*\*\*\*

\*\*\*\*\*

SeqID: li|LinJ\_32\_3230\_mRNA|

CELLO prediction:

| (predictor  | location       | reliable-index) |
|-------------|----------------|-----------------|
| Composition | PlasmaMembrane | 0.486           |
| Di-peptide  | Cytoplasmic    | 0.552           |
| part-Comp.  | Cytoplasmic    | 0.720           |
| chemo-typy  | Cytoplasmic    | 0.858           |

**Table S1.** Subcellular localization of proteins retrieved for TriTypDB database showing >80% homology among *L. infantum*, *L. major* and *L. braziliensis*.

|                             |             |                |                 |       |
|-----------------------------|-------------|----------------|-----------------|-------|
|                             | Neighboring | Cytoplasmic    | 0.460           |       |
| Combined SVM classifier:    |             |                |                 |       |
|                             |             | Extracellular  | 0.581           |       |
|                             |             | PlasmaMembrane | 0.691           |       |
|                             |             | Cytoplasmic    | 2.807 *         |       |
|                             |             | Cytoskeletal   | 0.007           |       |
|                             |             | ER             | 0.022           |       |
|                             |             | Golgi          | 0.117           |       |
|                             |             | Lysosomal      |                 | 0.040 |
|                             |             | Mitochondrial  | 0.077           |       |
|                             |             | Chloroplast    | 0.115           |       |
|                             |             | Peroxisomal    | 0.078           |       |
|                             |             | Vacuole        | 0.015           |       |
|                             |             | Nuclear        | 0.448           |       |
| *****                       |             |                |                 |       |
| *****                       |             |                |                 |       |
| SeqID: li LinJ_24_2220_mRNA |             |                |                 |       |
| CELLO prediction:           |             |                |                 |       |
|                             | (predictor  | location       | reliable-index) |       |
|                             | Composition | Extracellular  | 0.301           |       |
|                             | Di-peptide  | Extracellular  | 0.834           |       |
|                             | part-Comp.  | Cytoplasmic    | 0.449           |       |
|                             | chemo-typy  | Cytoplasmic    | 0.401           |       |
|                             | Neighboring | Cytoplasmic    | 0.321           |       |
| Combined SVM classifier:    |             |                |                 |       |
|                             |             | Extracellular  | 1.330 *         |       |
|                             |             | PlasmaMembrane | 0.359           |       |
|                             |             | Cytoplasmic    | 1.397 *         |       |
|                             |             | Cytoskeletal   | 0.027           |       |
|                             |             | ER             | 0.044           |       |
|                             |             | Golgi          | 0.055           |       |
|                             |             | Lysosomal      |                 | 0.093 |
|                             |             | Mitochondrial  | 0.310           |       |
|                             |             | Chloroplast    | 0.369           |       |
|                             |             | Peroxisomal    | 0.092           |       |
|                             |             | Vacuole        | 0.272           |       |
|                             |             | Nuclear        | 0.651           |       |
| *****                       |             |                |                 |       |
| *****                       |             |                |                 |       |
| SeqID: li LinJ_16_0470_mRNA |             |                |                 |       |
| CELLO prediction:           |             |                |                 |       |
|                             | (predictor  | location       | reliable-index) |       |
|                             | Composition | Cytoplasmic    | 0.725           |       |
|                             | Di-peptide  | Mitochondrial  | 0.691           |       |
|                             | part-Comp.  | Mitochondrial  | 0.501           |       |
|                             | chemo-typy  | Nuclear        | 0.553           |       |
|                             | Neighboring | Mitochondrial  | 0.459           |       |
| Combined SVM classifier:    |             |                |                 |       |
|                             |             | Extracellular  | 0.026           |       |
|                             |             | PlasmaMembrane | 0.022           |       |
|                             |             | Cytoplasmic    | 1.466           |       |
|                             |             | Cytoskeletal   | 0.012           |       |
|                             |             | ER             | 0.010           |       |
|                             |             | Golgi          | 0.009           |       |

**Table S1.** Subcellular localization of proteins retrieved for TriTypDB database showing >80% homology among *L. infantum*, *L. major* and *L. braziliensis*.

|                             |                |                 |
|-----------------------------|----------------|-----------------|
|                             | Lysosomal      | 0.008           |
|                             | Mitochondrial  | 2.243 *         |
|                             | Chloroplast    | 0.163           |
|                             | Peroxisomal    | 0.108           |
|                             | Vacuole        | 0.013           |
|                             | Nuclear        | 0.919           |
| *****                       |                |                 |
| *****                       |                |                 |
| SeqID: li LinJ_36_0660_mRNA |                |                 |
| CELLO prediction:           |                |                 |
| (predictor                  | location       | reliable-index) |
| Composition                 | Cytoplasmic    | 0.692           |
| Di-peptide                  | Nuclear        | 0.444           |
| part-Comp.                  | Nuclear        | 0.347           |
| chemo-typy                  | Extracellular  | 0.363           |
| Neighboring                 | Nuclear        | 0.445           |
| Combined SVM classifier:    |                |                 |
|                             | Extracellular  | 0.612           |
|                             | PlasmaMembrane | 0.013           |
|                             | Cytoplasmic    | 1.490 *         |
|                             | Cytoskeletal   | 0.008           |
|                             | ER             | 0.046           |
|                             | Golgi          | 0.006           |
|                             | Lysosomal      | 0.010           |
|                             | Mitochondrial  | 0.748           |
|                             | Chloroplast    | 0.202           |
|                             | Peroxisomal    | 0.042           |
|                             | Vacuole        | 0.037           |
|                             | Nuclear        | 1.786 *         |
| *****                       |                |                 |
| *****                       |                |                 |
| SeqID: li LinJ_35_2960_mRNA |                |                 |
| CELLO prediction:           |                |                 |
| (predictor                  | location       | reliable-index) |
| Composition                 | Nuclear        | 0.811           |
| Di-peptide                  | Cytoplasmic    | 0.376           |
| part-Comp.                  | Mitochondrial  | 0.496           |
| chemo-typy                  | Nuclear        | 0.584           |
| Neighboring                 | Cytoplasmic    | 0.523           |
| Combined SVM classifier:    |                |                 |
|                             | Extracellular  | 0.164           |
|                             | PlasmaMembrane | 0.035           |
|                             | Cytoplasmic    | 1.386 *         |
|                             | Cytoskeletal   | 0.019           |
|                             | ER             | 0.076           |
|                             | Golgi          | 0.024           |
|                             | Lysosomal      | 0.007           |
|                             | Mitochondrial  | 0.935           |
|                             | Chloroplast    | 0.266           |
|                             | Peroxisomal    | 0.059           |
|                             | Vacuole        | 0.018           |
|                             | Nuclear        | 2.010 *         |



**Table S1.** Subcellular localization of proteins retrieved for TriTypDB database showing >80% homology among *L. infantum*, *L. major* and *L. braziliensis*.

\*\*\*\*\*

\*\*\*\*\*

SeqID: li|LinJ\_34\_3280\_mRNA|

CELLO prediction:

| (predictor  | location    | reliable-index) |
|-------------|-------------|-----------------|
| Composition | Cytoplasmic | 0.691           |
| Di-peptide  | Cytoplasmic | 0.783           |
| part-Comp.  | Cytoplasmic | 0.854           |
| chemo-typy  | Cytoplasmic | 0.704           |
| Neighboring | Cytoplasmic | 0.819           |

Combined SVM classifier:

|                |       |       |
|----------------|-------|-------|
| Extracellular  | 0.013 |       |
| PlasmaMembrane | 0.014 |       |
| Cytoplasmic    | 3.850 | *     |
| Cytoskeletal   | 0.005 |       |
| ER             | 0.063 |       |
| Golgi          | 0.029 |       |
| Lysosomal      |       | 0.002 |
| Mitochondrial  | 0.536 |       |
| Chloroplast    | 0.357 |       |
| Peroxisomal    | 0.017 |       |
| Vacuole        | 0.005 |       |
| Nuclear        | 0.109 |       |

\*\*\*\*\*

\*\*\*\*\*

SeqID: li|LinJ\_21\_1310\_mRNA|

CELLO prediction:

| (predictor  | location      | reliable-index) |
|-------------|---------------|-----------------|
| Composition | Cytoplasmic   | 0.587           |
| Di-peptide  | Mitochondrial | 0.769           |
| part-Comp.  | Mitochondrial | 0.964           |
| chemo-typy  | Nuclear       | 0.571           |
| Neighboring | Mitochondrial | 0.855           |

Combined SVM classifier:

|                |       |       |
|----------------|-------|-------|
| Extracellular  | 0.014 |       |
| PlasmaMembrane | 0.011 |       |
| Cytoplasmic    | 0.934 |       |
| Cytoskeletal   | 0.009 |       |
| ER             | 0.005 |       |
| Golgi          | 0.006 |       |
| Lysosomal      |       | 0.004 |
| Mitochondrial  | 3.159 | *     |
| Chloroplast    | 0.119 |       |
| Peroxisomal    | 0.052 |       |
| Vacuole        | 0.005 |       |
| Nuclear        | 0.682 |       |

\*\*\*\*\*

\*\*\*\*\*

SeqID: li|LinJ\_19\_1500\_mRNA|

CELLO prediction:

| (predictor  | location    | reliable-index) |
|-------------|-------------|-----------------|
| Composition | Nuclear     | 0.554           |
| Di-peptide  | Cytoplasmic | 0.368           |
| part-Comp.  | Cytoplasmic | 0.392           |
| chemo-typy  | Nuclear     | 0.264           |

**Table S1.** Subcellular localization of proteins retrieved for TriTypDB database showing >80% homology among *L. infantum*, *L. major* and *L. braziliensis*.

|                             |             |                |                 |       |
|-----------------------------|-------------|----------------|-----------------|-------|
|                             | Neighboring | Extracellular  | 0.490           |       |
| Combined SVM classifier:    |             |                |                 |       |
|                             |             | Extracellular  | 0.886           |       |
|                             |             | PlasmaMembrane | 0.045           |       |
|                             |             | Cytoplasmic    | 1.225           | *     |
|                             |             | Cytoskeletal   | 0.035           |       |
|                             |             | ER             | 0.043           |       |
|                             |             | Golgi          | 0.021           |       |
|                             |             | Lysosomal      |                 | 0.024 |
|                             |             | Mitochondrial  | 0.804           |       |
|                             |             | Chloroplast    | 0.271           |       |
|                             |             | Peroxisomal    | 0.094           |       |
|                             |             | Vacuole        | 0.021           |       |
|                             |             | Nuclear        | 1.531           | *     |
| *****                       |             |                |                 |       |
| *****                       |             |                |                 |       |
| SeqID: li LinJ_36_3430_mRNA |             |                |                 |       |
| CELLO prediction:           |             |                |                 |       |
|                             | (predictor  | location       | reliable-index) |       |
|                             | Composition | Cytoplasmic    | 0.494           |       |
|                             | Di-peptide  | Mitochondrial  | 0.569           |       |
|                             | part-Comp.  | Mitochondrial  | 0.606           |       |
|                             | chemo-typy  | Nuclear        | 0.811           |       |
|                             | Neighboring | Nuclear        | 0.413           |       |
| Combined SVM classifier:    |             |                |                 |       |
|                             |             | Extracellular  | 0.163           |       |
|                             |             | PlasmaMembrane | 0.065           |       |
|                             |             | Cytoplasmic    | 1.107           | *     |
|                             |             | Cytoskeletal   | 0.010           |       |
|                             |             | ER             | 0.034           |       |
|                             |             | Golgi          | 0.011           |       |
|                             |             | Lysosomal      |                 | 0.016 |
|                             |             | Mitochondrial  | 1.721           | *     |
|                             |             | Chloroplast    | 0.203           |       |
|                             |             | Peroxisomal    | 0.034           |       |
|                             |             | Vacuole        | 0.027           |       |
|                             |             | Nuclear        | 1.610           | *     |
| *****                       |             |                |                 |       |
| *****                       |             |                |                 |       |
| SeqID: li LinJ_32_3940_mRNA |             |                |                 |       |
| CELLO prediction:           |             |                |                 |       |
|                             | (predictor  | location       | reliable-index) |       |
|                             | Composition | Mitochondrial  | 0.776           |       |
|                             | Di-peptide  | Mitochondrial  | 0.508           |       |
|                             | part-Comp.  | Nuclear        | 0.447           |       |
|                             | chemo-typy  | Nuclear        | 0.396           |       |
|                             | Neighboring | Mitochondrial  | 0.408           |       |
| Combined SVM classifier:    |             |                |                 |       |
|                             |             | Extracellular  | 0.391           |       |
|                             |             | PlasmaMembrane | 0.044           |       |
|                             |             | Cytoplasmic    | 0.702           |       |
|                             |             | Cytoskeletal   | 0.015           |       |
|                             |             | ER             | 0.020           |       |
|                             |             | Golgi          | 0.016           |       |

**Table S1.** Subcellular localization of proteins retrieved for TriTypDB database showing >80% homology among *L. infantum*, *L. major* and *L. braziliensis*.

|                             |                |                 |
|-----------------------------|----------------|-----------------|
|                             | Lysosomal      | 0.013           |
|                             | Mitochondrial  | 2.144 *         |
|                             | Chloroplast    | 0.192           |
|                             | Peroxisomal    | 0.070           |
|                             | Vacuole        | 0.006           |
|                             | Nuclear        | 1.388           |
| *****                       |                |                 |
| *****                       |                |                 |
| SeqID: li LinJ_27_0590_mRNA |                |                 |
| CELLO prediction:           |                |                 |
| (predictor                  | location       | reliable-index) |
| Composition                 | PlasmaMembrane | 0.739           |
| Di-peptide                  | Mitochondrial  | 0.622           |
| part-Comp.                  | Mitochondrial  | 0.657           |
| chemo-typy                  | Mitochondrial  | 0.590           |
| Neighboring                 | Mitochondrial  | 0.352           |
| Combined SVM classifier:    |                |                 |
|                             | Extracellular  | 0.288           |
|                             | PlasmaMembrane | 1.380           |
|                             | Cytoplasmic    | 0.192           |
|                             | Cytoskeletal   | 0.008           |
|                             | ER             | 0.013           |
|                             | Golgi          | 0.007           |
|                             | Lysosomal      | 0.121           |
|                             | Mitochondrial  | 2.334 *         |
|                             | Chloroplast    | 0.254           |
|                             | Peroxisomal    | 0.160           |
|                             | Vacuole        | 0.014           |
|                             | Nuclear        | 0.227           |
| *****                       |                |                 |
| *****                       |                |                 |
| SeqID: li LinJ_36_6950_mRNA |                |                 |
| CELLO prediction:           |                |                 |
| (predictor                  | location       | reliable-index) |
| Composition                 | Nuclear        | 0.516           |
| Di-peptide                  | Extracellular  | 0.765           |
| part-Comp.                  | Cytoplasmic    | 0.542           |
| chemo-typy                  | Cytoplasmic    | 0.941           |
| Neighboring                 | Cytoplasmic    | 0.717           |
| Combined SVM classifier:    |                |                 |
|                             | Extracellular  | 0.835           |
|                             | PlasmaMembrane | 0.347           |
|                             | Cytoplasmic    | 2.606 *         |
|                             | Cytoskeletal   | 0.029           |
|                             | ER             | 0.007           |
|                             | Golgi          | 0.048           |
|                             | Lysosomal      | 0.007           |
|                             | Mitochondrial  | 0.118           |
|                             | Chloroplast    | 0.204           |
|                             | Peroxisomal    | 0.037           |
|                             | Vacuole        | 0.009           |
|                             | Nuclear        | 0.754           |

**Table S1.** Subcellular localization of proteins retrieved for TriTypDB database showing >80% homology among *L. infantum*, *L. major* and *L. braziliensis*.

\*\*\*\*\*

\*\*\*\*\*

SeqID: li|LinJ\_25\_0370\_mRNA|

CELLO prediction:

| (predictor  | location      | reliable-index) |
|-------------|---------------|-----------------|
| Composition | Extracellular | 0.309           |
| Di-peptide  | Mitochondrial | 0.832           |
| part-Comp.  | Nuclear       | 0.340           |
| chemo-typy  | Nuclear       | 0.467           |
| Neighboring | Mitochondrial | 0.576           |

Combined SVM classifier:

|                |         |
|----------------|---------|
| Extracellular  | 0.395   |
| PlasmaMembrane | 0.032   |
| Cytoplasmic    | 0.575   |
| Cytoskeletal   | 0.022   |
| ER             | 0.020   |
| Golgi          | 0.010   |
| Lysosomal      | 0.018   |
| Mitochondrial  | 1.874 * |
| Chloroplast    | 0.478   |
| Peroxisomal    | 0.053   |
| Vacuole        | 0.024   |
| Nuclear        | 1.499 * |

\*\*\*\*\*

\*\*\*\*\*

SeqID: li|LinJ\_32\_0440\_mRNA|

CELLO prediction:

| (predictor  | location      | reliable-index) |
|-------------|---------------|-----------------|
| Composition | Mitochondrial | 0.382           |
| Di-peptide  | Nuclear       | 0.760           |
| part-Comp.  | Nuclear       | 0.558           |
| chemo-typy  | Mitochondrial | 0.590           |
| Neighboring | Mitochondrial | 0.689           |

Combined SVM classifier:

|                |         |
|----------------|---------|
| Extracellular  | 0.044   |
| PlasmaMembrane | 0.021   |
| Cytoplasmic    | 0.602   |
| Cytoskeletal   | 0.036   |
| ER             | 0.005   |
| Golgi          | 0.005   |
| Lysosomal      | 0.008   |
| Mitochondrial  | 2.178 * |
| Chloroplast    | 0.087   |
| Peroxisomal    | 0.027   |
| Vacuole        | 0.006   |
| Nuclear        | 1.979 * |

\*\*\*\*\*

\*\*\*\*\*

SeqID: li|LinJ\_22\_1260\_mRNA|

CELLO prediction:

| (predictor  | location    | reliable-index) |
|-------------|-------------|-----------------|
| Composition | Cytoplasmic | 0.299           |
| Di-peptide  | Cytoplasmic | 0.671           |
| part-Comp.  | Cytoplasmic | 0.680           |
| chemo-typy  | Cytoplasmic | 0.761           |

**Table S1.** Subcellular localization of proteins retrieved for TriTypDB database showing >80% homology among *L. infantum*, *L. major* and *L. braziliensis*.

|                             |             |                |                 |       |
|-----------------------------|-------------|----------------|-----------------|-------|
|                             | Neighboring | Cytoplasmic    | 0.791           |       |
| Combined SVM classifier:    |             |                |                 |       |
|                             |             | Extracellular  | 0.319           |       |
|                             |             | PlasmaMembrane | 0.056           |       |
|                             |             | Cytoplasmic    | 3.203           | *     |
|                             |             | Cytoskeletal   | 0.019           |       |
|                             |             | ER             | 0.231           |       |
|                             |             | Golgi          | 0.043           |       |
|                             |             | Lysosomal      |                 | 0.007 |
|                             |             | Mitochondrial  | 0.173           |       |
|                             |             | Chloroplast    | 0.406           |       |
|                             |             | Peroxisomal    | 0.036           |       |
|                             |             | Vacuole        | 0.034           |       |
|                             |             | Nuclear        | 0.474           |       |
| *****                       |             |                |                 |       |
| *****                       |             |                |                 |       |
| SeqID: li LinJ_13_1020_mRNA |             |                |                 |       |
| CELLO prediction:           |             |                |                 |       |
|                             | (predictor  | location       | reliable-index) |       |
|                             | Composition | Extracellular  | 0.197           |       |
|                             | Di-peptide  | Extracellular  | 0.774           |       |
|                             | part-Comp.  | Extracellular  | 0.314           |       |
|                             | chemo-typy  | Chloroplast    | 0.279           |       |
|                             | Neighboring | Extracellular  | 0.357           |       |
| Combined SVM classifier:    |             |                |                 |       |
|                             |             | Extracellular  | 1.828           | *     |
|                             |             | PlasmaMembrane | 0.389           |       |
|                             |             | Cytoplasmic    | 0.598           |       |
|                             |             | Cytoskeletal   | 0.023           |       |
|                             |             | ER             | 0.046           |       |
|                             |             | Golgi          | 0.059           |       |
|                             |             | Lysosomal      |                 | 0.036 |
|                             |             | Mitochondrial  | 0.587           |       |
|                             |             | Chloroplast    | 0.705           |       |
|                             |             | Peroxisomal    | 0.039           |       |
|                             |             | Vacuole        | 0.036           |       |
|                             |             | Nuclear        | 0.656           |       |
| *****                       |             |                |                 |       |
| *****                       |             |                |                 |       |
| SeqID: li LinJ_32_3260_mRNA |             |                |                 |       |
| CELLO prediction:           |             |                |                 |       |
|                             | (predictor  | location       | reliable-index) |       |
|                             | Composition | PlasmaMembrane | 0.397           |       |
|                             | Di-peptide  | Extracellular  | 0.613           |       |
|                             | part-Comp.  | PlasmaMembrane | 0.743           |       |
|                             | chemo-typy  | PlasmaMembrane | 0.757           |       |
|                             | Neighboring | PlasmaMembrane | 0.545           |       |
| Combined SVM classifier:    |             |                |                 |       |
|                             |             | Extracellular  | 1.125           |       |
|                             |             | PlasmaMembrane | 2.749           | *     |
|                             |             | Cytoplasmic    | 0.079           |       |
|                             |             | Cytoskeletal   | 0.011           |       |
|                             |             | ER             | 0.020           |       |
|                             |             | Golgi          | 0.013           |       |

**Table S1.** Subcellular localization of proteins retrieved for TriTypDB database showing >80% homology among *L. infantum*, *L. major* and *L. braziliensis*.

|                             |                |                 |
|-----------------------------|----------------|-----------------|
|                             | Lysosomal      | 0.027           |
|                             | Mitochondrial  | 0.365           |
|                             | Chloroplast    | 0.373           |
|                             | Peroxisomal    | 0.049           |
|                             | Vacuole        | 0.030           |
|                             | Nuclear        | 0.160           |
| *****                       |                |                 |
| *****                       |                |                 |
| SeqID: li LinJ_26_1080_mRNA |                |                 |
| CELLO prediction:           |                |                 |
| (predictor                  | location       | reliable-index) |
| Composition                 | Mitochondrial  | 0.689           |
| Di-peptide                  | Mitochondrial  | 0.763           |
| part-Comp.                  | Mitochondrial  | 0.602           |
| chemo-typy                  | Mitochondrial  | 0.493           |
| Neighboring                 | Mitochondrial  | 0.466           |
| Combined SVM classifier:    |                |                 |
|                             | Extracellular  | 0.090           |
|                             | PlasmaMembrane | 0.442           |
|                             | Cytoplasmic    | 0.307           |
|                             | Cytoskeletal   | 0.008           |
|                             | ER             | 0.033           |
|                             | Golgi          | 0.009           |
|                             | Lysosomal      | 0.100           |
|                             | Mitochondrial  | 3.013 *         |
|                             | Chloroplast    | 0.607           |
|                             | Peroxisomal    | 0.121           |
|                             | Vacuole        | 0.018           |
|                             | Nuclear        | 0.251           |
| *****                       |                |                 |
| *****                       |                |                 |
| SeqID: li LinJ_36_3560_mRNA |                |                 |
| CELLO prediction:           |                |                 |
| (predictor                  | location       | reliable-index) |
| Composition                 | Nuclear        | 0.424           |
| Di-peptide                  | Mitochondrial  | 0.563           |
| part-Comp.                  | Nuclear        | 0.497           |
| chemo-typy                  | Nuclear        | 0.505           |
| Neighboring                 | Nuclear        | 0.503           |
| Combined SVM classifier:    |                |                 |
|                             | Extracellular  | 0.265           |
|                             | PlasmaMembrane | 0.110           |
|                             | Cytoplasmic    | 0.392           |
|                             | Cytoskeletal   | 0.019           |
|                             | ER             | 0.018           |
|                             | Golgi          | 0.009           |
|                             | Lysosomal      | 0.012           |
|                             | Mitochondrial  | 1.556 *         |
|                             | Chloroplast    | 0.319           |
|                             | Peroxisomal    | 0.032           |
|                             | Vacuole        | 0.014           |
|                             | Nuclear        | 2.252 *         |

**Table S1.** Subcellular localization of proteins retrieved for TriTypDB database showing >80% homology among *L. infantum*, *L. major* and *L. braziliensis*.

\*\*\*\*\*

\*\*\*\*\*

SeqID: li|LinJ\_31\_0070\_mRNA|

CELLO prediction:

| (predictor  | location      | reliable-index) |
|-------------|---------------|-----------------|
| Composition | Mitochondrial | 0.799           |
| Di-peptide  | Mitochondrial | 0.794           |
| part-Comp.  | Mitochondrial | 0.333           |
| chemo-typy  | Mitochondrial | 0.509           |
| Neighboring | Mitochondrial | 0.396           |

Combined SVM classifier:

|                |         |
|----------------|---------|
| Extracellular  | 0.121   |
| PlasmaMembrane | 0.187   |
| Cytoplasmic    | 0.576   |
| Cytoskeletal   | 0.014   |
| ER             | 0.016   |
| Golgi          | 0.011   |
| Lysosomal      | 0.022   |
| Mitochondrial  | 2.831 * |
| Chloroplast    | 0.504   |
| Peroxisomal    | 0.087   |
| Vacuole        | 0.020   |
| Nuclear        | 0.611   |

\*\*\*\*\*

\*\*\*\*\*

SeqID: li|LinJ\_08\_1280\_mRNA|

CELLO prediction:

| (predictor  | location    | reliable-index) |
|-------------|-------------|-----------------|
| Composition | Cytoplasmic | 0.524           |
| Di-peptide  | Cytoplasmic | 0.857           |
| part-Comp.  | Cytoplasmic | 0.816           |
| chemo-typy  | Cytoplasmic | 0.648           |
| Neighboring | Cytoplasmic | 0.820           |

Combined SVM classifier:

|                |         |
|----------------|---------|
| Extracellular  | 0.100   |
| PlasmaMembrane | 0.191   |
| Cytoplasmic    | 3.664 * |
| Cytoskeletal   | 0.008   |
| ER             | 0.028   |
| Golgi          | 0.018   |
| Lysosomal      | 0.048   |
| Mitochondrial  | 0.067   |
| Chloroplast    | 0.104   |
| Peroxisomal    | 0.027   |
| Vacuole        | 0.047   |
| Nuclear        | 0.698   |

\*\*\*\*\*

\*\*\*\*\*

SeqID: li|LinJ\_33\_3340\_mRNA|

CELLO prediction:

| (predictor  | location      | reliable-index) |
|-------------|---------------|-----------------|
| Composition | Mitochondrial | 0.558           |
| Di-peptide  | Extracellular | 0.617           |
| part-Comp.  | Nuclear       | 0.556           |
| chemo-typy  | Nuclear       | 0.406           |

**Table S1.** Subcellular localization of proteins retrieved for TriTypDB database showing >80% homology among *L. infantum*, *L. major* and *L. braziliensis*.

|                             |             |                |                 |       |
|-----------------------------|-------------|----------------|-----------------|-------|
|                             | Neighboring | Nuclear        | 0.362           |       |
| Combined SVM classifier:    |             |                |                 |       |
|                             |             | Extracellular  | 0.852           |       |
|                             |             | PlasmaMembrane | 0.041           |       |
|                             |             | Cytoplasmic    | 0.833           |       |
|                             |             | Cytoskeletal   | 0.018           |       |
|                             |             | ER             | 0.020           |       |
|                             |             | Golgi          | 0.032           |       |
|                             |             | Lysosomal      |                 | 0.011 |
|                             |             | Mitochondrial  | 1.389           | *     |
|                             |             | Chloroplast    | 0.158           |       |
|                             |             | Peroxisomal    | 0.053           |       |
|                             |             | Vacuole        | 0.009           |       |
|                             |             | Nuclear        | 1.584           | *     |
| *****                       |             |                |                 |       |
| *****                       |             |                |                 |       |
| SeqID: li LinJ_29_0910_mRNA |             |                |                 |       |
| CELLO prediction:           |             |                |                 |       |
|                             | (predictor  | location       | reliable-index) |       |
|                             | Composition | Cytoplasmic    | 0.446           |       |
|                             | Di-peptide  | Mitochondrial  | 0.505           |       |
|                             | part-Comp.  | Nuclear        | 0.468           |       |
|                             | chemo-typy  | Nuclear        | 0.865           |       |
|                             | Neighboring | Mitochondrial  | 0.674           |       |
| Combined SVM classifier:    |             |                |                 |       |
|                             |             | Extracellular  | 0.149           |       |
|                             |             | PlasmaMembrane | 0.063           |       |
|                             |             | Cytoplasmic    | 0.740           |       |
|                             |             | Cytoskeletal   | 0.021           |       |
|                             |             | ER             | 0.019           |       |
|                             |             | Golgi          | 0.009           |       |
|                             |             | Lysosomal      |                 | 0.011 |
|                             |             | Mitochondrial  | 1.714           | *     |
|                             |             | Chloroplast    | 0.132           |       |
|                             |             | Peroxisomal    | 0.128           |       |
|                             |             | Vacuole        | 0.026           |       |
|                             |             | Nuclear        | 1.987           | *     |
| *****                       |             |                |                 |       |
| *****                       |             |                |                 |       |
| SeqID: li LinJ_07_0210_mRNA |             |                |                 |       |
| CELLO prediction:           |             |                |                 |       |
|                             | (predictor  | location       | reliable-index) |       |
|                             | Composition | Mitochondrial  | 0.355           |       |
|                             | Di-peptide  | Cytoplasmic    | 0.539           |       |
|                             | part-Comp.  | Mitochondrial  | 0.752           |       |
|                             | chemo-typy  | Nuclear        | 0.414           |       |
|                             | Neighboring | Extracellular  | 0.365           |       |
| Combined SVM classifier:    |             |                |                 |       |
|                             |             | Extracellular  | 0.511           |       |
|                             |             | PlasmaMembrane | 0.054           |       |
|                             |             | Cytoplasmic    | 0.910           |       |
|                             |             | Cytoskeletal   | 0.010           |       |
|                             |             | ER             | 0.037           |       |
|                             |             | Golgi          | 0.011           |       |



**Table S1.** Subcellular localization of proteins retrieved for TriTypDB database showing >80% homology among *L. infantum*, *L. major* and *L. braziliensis*.

|                             |                |                 |
|-----------------------------|----------------|-----------------|
|                             | Lysosomal      | 0.617           |
|                             | Mitochondrial  | 1.472 *         |
|                             | Chloroplast    | 0.438           |
|                             | Peroxisomal    | 0.179           |
|                             | Vacuole        | 0.083           |
|                             | Nuclear        | 0.678           |
| *****                       |                |                 |
| *****                       |                |                 |
| SeqID: li LinJ_36_3960_mRNA |                |                 |
| CELLO prediction:           |                |                 |
| (predictor                  | location       | reliable-index) |
| Composition                 | Chloroplast    | 0.338           |
| Di-peptide                  | Nuclear        | 0.663           |
| part-Comp.                  | Mitochondrial  | 0.387           |
| chemo-typy                  | Nuclear        | 0.681           |
| Neighboring                 | Nuclear        | 0.300           |
| Combined SVM classifier:    |                |                 |
|                             | Extracellular  | 0.231           |
|                             | PlasmaMembrane | 0.033           |
|                             | Cytoplasmic    | 0.918           |
|                             | Cytoskeletal   | 0.013           |
|                             | ER             | 0.021           |
|                             | Golgi          | 0.011           |
|                             | Lysosomal      | 0.010           |
|                             | Mitochondrial  | 0.935           |
|                             | Chloroplast    | 0.555           |
|                             | Peroxisomal    | 0.117           |
|                             | Vacuole        | 0.023           |
|                             | Nuclear        | 2.133 *         |
| *****                       |                |                 |
| *****                       |                |                 |
| SeqID: li LinJ_15_0090_mRNA |                |                 |
| CELLO prediction:           |                |                 |
| (predictor                  | location       | reliable-index) |
| Composition                 | Cytoplasmic    | 0.713           |
| Di-peptide                  | Cytoplasmic    | 0.916           |
| part-Comp.                  | Mitochondrial  | 0.585           |
| chemo-typy                  | Mitochondrial  | 0.433           |
| Neighboring                 | Cytoplasmic    | 0.618           |
| Combined SVM classifier:    |                |                 |
|                             | Extracellular  | 0.012           |
|                             | PlasmaMembrane | 0.011           |
|                             | Cytoplasmic    | 2.930 *         |
|                             | Cytoskeletal   | 0.013           |
|                             | ER             | 0.028           |
|                             | Golgi          | 0.018           |
|                             | Lysosomal      | 0.001           |
|                             | Mitochondrial  | 1.435           |
|                             | Chloroplast    | 0.220           |
|                             | Peroxisomal    | 0.021           |
|                             | Vacuole        | 0.002           |
|                             | Nuclear        | 0.308           |

**Table S1.** Subcellular localization of proteins retrieved for TriTypDB database showing >80% homology among *L. infantum*, *L. major* and *L. braziliensis*.

\*\*\*\*\*

\*\*\*\*\*

SeqID: li|LinJ\_16\_1330\_mRNA|

CELLO prediction:

| (predictor  | location      | reliable-index) |
|-------------|---------------|-----------------|
| Composition | Mitochondrial | 0.545           |
| Di-peptide  | Mitochondrial | 0.626           |
| part-Comp.  | Cytoplasmic   | 0.408           |
| chemo-typy  | Extracellular | 0.678           |
| Neighboring | Cytoplasmic   | 0.361           |

Combined SVM classifier:

|                |         |
|----------------|---------|
| Extracellular  | 0.988   |
| PlasmaMembrane | 0.255   |
| Cytoplasmic    | 1.092 * |
| Cytoskeletal   | 0.026   |
| ER             | 0.043   |
| Golgi          | 0.023   |
| Lysosomal      | 0.045   |
| Mitochondrial  | 1.576 * |
| Chloroplast    | 0.562   |
| Peroxisomal    | 0.063   |
| Vacuole        | 0.015   |
| Nuclear        | 0.313   |

\*\*\*\*\*

\*\*\*\*\*

SeqID: li|LinJ\_36\_3550\_mRNA|

CELLO prediction:

| (predictor  | location      | reliable-index) |
|-------------|---------------|-----------------|
| Composition | Nuclear       | 0.417           |
| Di-peptide  | Mitochondrial | 0.462           |
| part-Comp.  | Nuclear       | 0.467           |
| chemo-typy  | Nuclear       | 0.535           |
| Neighboring | Nuclear       | 0.475           |

Combined SVM classifier:

|                |         |
|----------------|---------|
| Extracellular  | 0.295   |
| PlasmaMembrane | 0.122   |
| Cytoplasmic    | 0.431   |
| Cytoskeletal   | 0.018   |
| ER             | 0.019   |
| Golgi          | 0.010   |
| Lysosomal      | 0.014   |
| Mitochondrial  | 1.393   |
| Chloroplast    | 0.331   |
| Peroxisomal    | 0.035   |
| Vacuole        | 0.015   |
| Nuclear        | 2.319 * |

\*\*\*\*\*

\*\*\*\*\*

SeqID: li|LinJ\_28\_0780\_mRNA|

CELLO prediction:

| (predictor  | location      | reliable-index) |
|-------------|---------------|-----------------|
| Composition | Mitochondrial | 0.669           |
| Di-peptide  | Mitochondrial | 0.708           |
| part-Comp.  | Mitochondrial | 0.931           |
| chemo-typy  | Mitochondrial | 0.723           |

**Table S1.** Subcellular localization of proteins retrieved for TriTypDB database showing >80% homology among *L. infantum*, *L. major* and *L. braziliensis*.

|                             |             |                |                 |       |
|-----------------------------|-------------|----------------|-----------------|-------|
|                             | Neighboring | Mitochondrial  | 0.895           |       |
| Combined SVM classifier:    |             |                |                 |       |
|                             |             | Extracellular  | 0.120           |       |
|                             |             | PlasmaMembrane | 0.009           |       |
|                             |             | Cytoplasmic    | 0.114           |       |
|                             |             | Cytoskeletal   | 0.010           |       |
|                             |             | ER             | 0.011           |       |
|                             |             | Golgi          | 0.005           |       |
|                             |             | Lysosomal      |                 | 0.007 |
|                             |             | Mitochondrial  | 3.926 *         |       |
|                             |             | Chloroplast    | 0.127           |       |
|                             |             | Peroxisomal    | 0.048           |       |
|                             |             | Vacuole        | 0.004           |       |
|                             |             | Nuclear        | 0.619           |       |
| *****                       |             |                |                 |       |
| *****                       |             |                |                 |       |
| SeqID: li LinJ_01_0270_mRNA |             |                |                 |       |
| CELLO prediction:           |             |                |                 |       |
|                             | (predictor  | location       | reliable-index) |       |
|                             | Composition | Chloroplast    | 0.338           |       |
|                             | Di-peptide  | Cytoplasmic    | 0.318           |       |
|                             | part-Comp.  | Cytoplasmic    | 0.428           |       |
|                             | chemo-typy  | Cytoplasmic    | 0.525           |       |
|                             | Neighboring | Extracellular  | 0.394           |       |
| Combined SVM classifier:    |             |                |                 |       |
|                             |             | Extracellular  | 0.625           |       |
|                             |             | PlasmaMembrane | 0.570           |       |
|                             |             | Cytoplasmic    | 1.705 *         |       |
|                             |             | Cytoskeletal   | 0.036           |       |
|                             |             | ER             | 0.039           |       |
|                             |             | Golgi          | 0.041           |       |
|                             |             | Lysosomal      |                 | 0.025 |
|                             |             | Mitochondrial  | 0.479           |       |
|                             |             | Chloroplast    | 0.795           |       |
|                             |             | Peroxisomal    | 0.166           |       |
|                             |             | Vacuole        | 0.018           |       |
|                             |             | Nuclear        | 0.502           |       |
| *****                       |             |                |                 |       |
| *****                       |             |                |                 |       |
| SeqID: li LinJ_35_3490_mRNA |             |                |                 |       |
| CELLO prediction:           |             |                |                 |       |
|                             | (predictor  | location       | reliable-index) |       |
|                             | Composition | Nuclear        | 0.326           |       |
|                             | Di-peptide  | Cytoplasmic    | 0.541           |       |
|                             | part-Comp.  | Nuclear        | 0.351           |       |
|                             | chemo-typy  | Mitochondrial  | 0.332           |       |
|                             | Neighboring | Cytoplasmic    | 0.450           |       |
| Combined SVM classifier:    |             |                |                 |       |
|                             |             | Extracellular  | 0.508           |       |
|                             |             | PlasmaMembrane | 0.113           |       |
|                             |             | Cytoplasmic    | 1.457 *         |       |
|                             |             | Cytoskeletal   | 0.020           |       |
|                             |             | ER             | 0.041           |       |
|                             |             | Golgi          | 0.045           |       |

**Table S1.** Subcellular localization of proteins retrieved for TriTypDB database showing >80% homology among *L. infantum*, *L. major* and *L. braziliensis*.

|                             |                |                 |
|-----------------------------|----------------|-----------------|
|                             | Lysosomal      | 0.045           |
|                             | Mitochondrial  | 0.600           |
|                             | Chloroplast    | 0.719           |
|                             | Peroxisomal    | 0.076           |
|                             | Vacuole        | 0.062           |
|                             | Nuclear        | 1.313 *         |
| *****                       |                |                 |
| *****                       |                |                 |
| SeqID: li LinJ_20_0250_mRNA |                |                 |
| CELLO prediction:           |                |                 |
| (predictor                  | location       | reliable-index) |
| Composition                 | Nuclear        | 0.746           |
| Di-peptide                  | Nuclear        | 0.590           |
| part-Comp.                  | Mitochondrial  | 0.492           |
| chemo-typy                  | Cytoplasmic    | 0.610           |
| Neighboring                 | Extracellular  | 0.188           |
| Combined SVM classifier:    |                |                 |
|                             | Extracellular  | 0.283           |
|                             | PlasmaMembrane | 0.212           |
|                             | Cytoplasmic    | 1.357 *         |
|                             | Cytoskeletal   | 0.015           |
|                             | ER             | 0.074           |
|                             | Golgi          | 0.017           |
|                             | Lysosomal      | 0.009           |
|                             | Mitochondrial  | 0.631           |
|                             | Chloroplast    | 0.445           |
|                             | Peroxisomal    | 0.037           |
|                             | Vacuole        | 0.029           |
|                             | Nuclear        | 1.892 *         |
| *****                       |                |                 |
| *****                       |                |                 |
| SeqID: li LinJ_20_0340_mRNA |                |                 |
| CELLO prediction:           |                |                 |
| (predictor                  | location       | reliable-index) |
| Composition                 | Mitochondrial  | 0.712           |
| Di-peptide                  | Extracellular  | 0.378           |
| part-Comp.                  | Nuclear        | 0.465           |
| chemo-typy                  | Mitochondrial  | 0.620           |
| Neighboring                 | Mitochondrial  | 0.432           |
| Combined SVM classifier:    |                |                 |
|                             | Extracellular  | 0.837           |
|                             | PlasmaMembrane | 0.341           |
|                             | Cytoplasmic    | 0.277           |
|                             | Cytoskeletal   | 0.011           |
|                             | ER             | 0.083           |
|                             | Golgi          | 0.016           |
|                             | Lysosomal      | 0.022           |
|                             | Mitochondrial  | 2.428 *         |
|                             | Chloroplast    | 0.097           |
|                             | Peroxisomal    | 0.091           |
|                             | Vacuole        | 0.013           |
|                             | Nuclear        | 0.785           |

**Table S1.** Subcellular localization of proteins retrieved for TriTypDB database showing >80% homology among *L. infantum*, *L. major* and *L. braziliensis*.

```

*****
*****
SeqID: li|LinJ_24_0040_mRNA|
      CELLO prediction:
              (predictor      location      reliable-index)
Composition      Mitochondrial    0.429
Di-peptide       Nuclear          0.736
part-Comp.       Nuclear          0.540
chemo-typy       Mitochondrial    0.646
Neighboring      Mitochondrial    0.705

      Combined SVM classifier:
                                Extracellular    0.050
                                PlasmaMembrane    0.020
                                Cytoplasmic        0.539
                                Cytoskeletal        0.034
                                ER                  0.005
                                Golgi              0.006
                                Lysosomal          0.008
                                Mitochondrial      2.340 *
                                Chloroplast        0.087
                                Peroxisomal        0.030
                                Vacuole            0.007
                                Nuclear            1.875 *

*****
*****
SeqID: li|LinJ_03_0210_mRNA|
      CELLO prediction:
              (predictor      location      reliable-index)
Composition      Mitochondrial    0.651
Di-peptide       Mitochondrial    0.618
part-Comp.       Mitochondrial    0.464
chemo-typy       Nuclear          0.346
Neighboring      Mitochondrial    0.697

      Combined SVM classifier:
                                Extracellular    0.046
                                PlasmaMembrane    0.277
                                Cytoplasmic        0.528
                                Cytoskeletal        0.031
                                ER                  0.012
                                Golgi              0.010
                                Lysosomal          0.008
                                Mitochondrial      2.747 *
                                Chloroplast        0.210
                                Peroxisomal        0.155
                                Vacuole            0.009
                                Nuclear            0.967

*****
*****
SeqID: li|LinJ_14_1010_mRNA|
      CELLO prediction:
              (predictor      location      reliable-index)
Composition      Mitochondrial    0.918
Di-peptide       Mitochondrial    0.306
part-Comp.       Mitochondrial    0.718
chemo-typy       Mitochondrial    0.673

```

**Table S1.** Subcellular localization of proteins retrieved for TriTypDB database showing >80% homology among *L. infantum*, *L. major* and *L. braziliensis*.

|                             |             |                |                 |       |
|-----------------------------|-------------|----------------|-----------------|-------|
|                             | Neighboring | Mitochondrial  | 0.797           |       |
| Combined SVM classifier:    |             |                |                 |       |
|                             |             | Extracellular  | 0.067           |       |
|                             |             | PlasmaMembrane | 0.446           |       |
|                             |             | Cytoplasmic    | 0.147           |       |
|                             |             | Cytoskeletal   | 0.013           |       |
|                             |             | ER             | 0.010           |       |
|                             |             | Golgi          | 0.008           |       |
|                             |             | Lysosomal      |                 | 0.008 |
|                             |             | Mitochondrial  | 3.413           | *     |
|                             |             | Chloroplast    | 0.450           |       |
|                             |             | Peroxisomal    | 0.165           |       |
|                             |             | Vacuole        | 0.025           |       |
|                             |             | Nuclear        | 0.248           |       |
| *****                       |             |                |                 |       |
| *****                       |             |                |                 |       |
| SeqID: li LinJ_35_0210_mRNA |             |                |                 |       |
| CELLO prediction:           |             |                |                 |       |
|                             | (predictor  | location       | reliable-index) |       |
|                             | Composition | PlasmaMembrane | 0.547           |       |
|                             | Di-peptide  | PlasmaMembrane | 0.424           |       |
|                             | part-Comp.  | PlasmaMembrane | 0.511           |       |
|                             | chemo-typy  | Chloroplast    | 0.371           |       |
|                             | Neighboring | PlasmaMembrane | 0.339           |       |
| Combined SVM classifier:    |             |                |                 |       |
|                             |             | Extracellular  | 1.099           |       |
|                             |             | PlasmaMembrane | 1.879           | *     |
|                             |             | Cytoplasmic    | 0.341           |       |
|                             |             | Cytoskeletal   | 0.012           |       |
|                             |             | ER             | 0.028           |       |
|                             |             | Golgi          | 0.024           |       |
|                             |             | Lysosomal      |                 | 0.023 |
|                             |             | Mitochondrial  | 0.421           |       |
|                             |             | Chloroplast    | 0.440           |       |
|                             |             | Peroxisomal    | 0.079           |       |
|                             |             | Vacuole        | 0.013           |       |
|                             |             | Nuclear        | 0.641           |       |
| *****                       |             |                |                 |       |
| *****                       |             |                |                 |       |
| SeqID: li LinJ_36_1680_mRNA |             |                |                 |       |
| CELLO prediction:           |             |                |                 |       |
|                             | (predictor  | location       | reliable-index) |       |
|                             | Composition | Nuclear        | 0.538           |       |
|                             | Di-peptide  | Extracellular  | 0.515           |       |
|                             | part-Comp.  | Extracellular  | 0.667           |       |
|                             | chemo-typy  | Nuclear        | 0.658           |       |
|                             | Neighboring | Extracellular  | 0.563           |       |
| Combined SVM classifier:    |             |                |                 |       |
|                             |             | Extracellular  | 1.882           | *     |
|                             |             | PlasmaMembrane | 0.100           |       |
|                             |             | Cytoplasmic    | 0.263           |       |
|                             |             | Cytoskeletal   | 0.014           |       |
|                             |             | ER             | 0.016           |       |
|                             |             | Golgi          | 0.008           |       |

**Table S1.** Subcellular localization of proteins retrieved for TriTypDB database showing >80% homology among *L. infantum*, *L. major* and *L. braziliensis*.

|                             |                |                 |
|-----------------------------|----------------|-----------------|
|                             | Lysosomal      | 0.041           |
|                             | Mitochondrial  | 0.254           |
|                             | Chloroplast    | 0.076           |
|                             | Peroxisomal    | 0.013           |
|                             | Vacuole        | 0.012           |
|                             | Nuclear        | 2.320 *         |
| *****                       |                |                 |
| *****                       |                |                 |
| SeqID: li LinJ_31_2890_mRNA |                |                 |
| CELLO prediction:           |                |                 |
| (predictor                  | location       | reliable-index) |
| Composition                 | Chloroplast    | 0.280           |
| Di-peptide                  | Mitochondrial  | 0.777           |
| part-Comp.                  | Chloroplast    | 0.544           |
| chemo-typy                  | Cytoplasmic    | 0.452           |
| Neighboring                 | Mitochondrial  | 0.417           |
| Combined SVM classifier:    |                |                 |
|                             | Extracellular  | 0.491           |
|                             | PlasmaMembrane | 0.173           |
|                             | Cytoplasmic    | 0.889           |
|                             | Cytoskeletal   | 0.017           |
|                             | ER             | 0.143           |
|                             | Golgi          | 0.027           |
|                             | Lysosomal      | 0.072           |
|                             | Mitochondrial  | 1.587 *         |
|                             | Chloroplast    | 1.152 *         |
|                             | Peroxisomal    | 0.115           |
|                             | Vacuole        | 0.032           |
|                             | Nuclear        | 0.302           |
| *****                       |                |                 |
| *****                       |                |                 |
| SeqID: li LinJ_04_1190_mRNA |                |                 |
| CELLO prediction:           |                |                 |
| (predictor                  | location       | reliable-index) |
| Composition                 | Nuclear        | 0.597           |
| Di-peptide                  | Nuclear        | 0.645           |
| part-Comp.                  | Nuclear        | 0.955           |
| chemo-typy                  | Extracellular  | 0.805           |
| Neighboring                 | Nuclear        | 0.521           |
| Combined SVM classifier:    |                |                 |
|                             | Extracellular  | 1.162           |
|                             | PlasmaMembrane | 0.131           |
|                             | Cytoplasmic    | 0.492           |
|                             | Cytoskeletal   | 0.013           |
|                             | ER             | 0.039           |
|                             | Golgi          | 0.014           |
|                             | Lysosomal      | 0.018           |
|                             | Mitochondrial  | 0.174           |
|                             | Chloroplast    | 0.106           |
|                             | Peroxisomal    | 0.045           |
|                             | Vacuole        | 0.045           |
|                             | Nuclear        | 2.761 *         |

**Table S1.** Subcellular localization of proteins retrieved for TriTypDB database showing >80% homology among *L. infantum*, *L. major* and *L. braziliensis*.

\*\*\*\*\*

\*\*\*\*\*

SeqID: li|LinJ\_32\_3370\_mRNA|

CELLO prediction:

| (predictor  | location       | reliable-index) |
|-------------|----------------|-----------------|
| Composition | Cytoplasmic    | 0.419           |
| Di-peptide  | Extracellular  | 0.228           |
| part-Comp.  | PlasmaMembrane | 0.256           |
| chemo-typy  | Chloroplast    | 0.355           |
| Neighboring | Extracellular  | 0.366           |

Combined SVM classifier:

|                |       |       |
|----------------|-------|-------|
| Extracellular  | 1.033 | *     |
| PlasmaMembrane | 0.389 |       |
| Cytoplasmic    | 0.938 |       |
| Cytoskeletal   | 0.039 |       |
| ER             | 0.032 |       |
| Golgi          | 0.038 |       |
| Lysosomal      |       | 0.401 |
| Mitochondrial  | 0.649 |       |
| Chloroplast    | 0.827 |       |
| Peroxisomal    | 0.092 |       |
| Vacuole        | 0.050 |       |
| Nuclear        | 0.512 |       |

\*\*\*\*\*

\*\*\*\*\*

SeqID: li|LinJ\_28\_1620\_mRNA|

CELLO prediction:

| (predictor  | location       | reliable-index) |
|-------------|----------------|-----------------|
| Composition | PlasmaMembrane | 0.822           |
| Di-peptide  | PlasmaMembrane | 0.577           |
| part-Comp.  | PlasmaMembrane | 0.833           |
| chemo-typy  | PlasmaMembrane | 0.887           |
| Neighboring | PlasmaMembrane | 0.763           |

Combined SVM classifier:

|                |       |       |
|----------------|-------|-------|
| Extracellular  | 0.291 |       |
| PlasmaMembrane | 3.883 | *     |
| Cytoplasmic    | 0.038 |       |
| Cytoskeletal   | 0.004 |       |
| ER             | 0.015 |       |
| Golgi          | 0.006 |       |
| Lysosomal      |       | 0.029 |
| Mitochondrial  | 0.426 |       |
| Chloroplast    | 0.198 |       |
| Peroxisomal    | 0.036 |       |
| Vacuole        | 0.005 |       |
| Nuclear        | 0.068 |       |

\*\*\*\*\*

\*\*\*\*\*

SeqID: li|LinJ\_36\_5970\_mRNA|

CELLO prediction:

| (predictor  | location    | reliable-index) |
|-------------|-------------|-----------------|
| Composition | Cytoplasmic | 0.395           |
| Di-peptide  | Nuclear     | 0.707           |
| part-Comp.  | Nuclear     | 0.475           |
| chemo-typy  | Nuclear     | 0.907           |



**Table S1.** Subcellular localization of proteins retrieved for TriTypDB database showing >80% homology among *L. infantum*, *L. major* and *L. braziliensis*.

|                             |             |                |                 |       |
|-----------------------------|-------------|----------------|-----------------|-------|
|                             | Neighboring | Nuclear        | 0.369           |       |
| Combined SVM classifier:    |             |                |                 |       |
|                             |             | Extracellular  | 0.253           |       |
|                             |             | PlasmaMembrane | 0.059           |       |
|                             |             | Cytoplasmic    | 0.900           |       |
|                             |             | Cytoskeletal   | 0.014           |       |
|                             |             | ER             | 0.020           |       |
|                             |             | Golgi          | 0.012           |       |
|                             |             | Lysosomal      |                 | 0.013 |
|                             |             | Mitochondrial  | 0.883           |       |
|                             |             | Chloroplast    | 0.215           |       |
|                             |             | Peroxisomal    | 0.024           |       |
|                             |             | Vacuole        | 0.015           |       |
|                             |             | Nuclear        | 2.592           | *     |
| *****                       |             |                |                 |       |
| *****                       |             |                |                 |       |
| SeqID: li LinJ_34_1880_mRNA |             |                |                 |       |
| CELLO prediction:           |             |                |                 |       |
|                             | (predictor  | location       | reliable-index) |       |
|                             | Composition | Chloroplast    | 0.331           |       |
|                             | Di-peptide  | Cytoplasmic    | 0.517           |       |
|                             | part-Comp.  | Chloroplast    | 0.862           |       |
|                             | chemo-typy  | Chloroplast    | 0.425           |       |
|                             | Neighboring | Cytoplasmic    | 0.334           |       |
| Combined SVM classifier:    |             |                |                 |       |
|                             |             | Extracellular  | 0.075           |       |
|                             |             | PlasmaMembrane | 0.311           |       |
|                             |             | Cytoplasmic    | 1.158           |       |
|                             |             | Cytoskeletal   | 0.015           |       |
|                             |             | ER             | 0.020           |       |
|                             |             | Golgi          | 0.021           |       |
|                             |             | Lysosomal      |                 | 0.006 |
|                             |             | Mitochondrial  | 0.822           |       |
|                             |             | Chloroplast    | 2.081           | *     |
|                             |             | Peroxisomal    | 0.018           |       |
|                             |             | Vacuole        | 0.006           |       |
|                             |             | Nuclear        | 0.467           |       |
| *****                       |             |                |                 |       |
| *****                       |             |                |                 |       |
| SeqID: li LinJ_36_4570_mRNA |             |                |                 |       |
| CELLO prediction:           |             |                |                 |       |
|                             | (predictor  | location       | reliable-index) |       |
|                             | Composition | Mitochondrial  | 0.474           |       |
|                             | Di-peptide  | Cytoplasmic    | 0.612           |       |
|                             | part-Comp.  | Mitochondrial  | 0.652           |       |
|                             | chemo-typy  | Cytoplasmic    | 0.795           |       |
|                             | Neighboring | Cytoplasmic    | 0.792           |       |
| Combined SVM classifier:    |             |                |                 |       |
|                             |             | Extracellular  | 0.009           |       |
|                             |             | PlasmaMembrane | 0.006           |       |
|                             |             | Cytoplasmic    | 2.623           | *     |
|                             |             | Cytoskeletal   | 0.010           |       |
|                             |             | ER             | 0.018           |       |
|                             |             | Golgi          | 0.020           |       |

**Table S1.** Subcellular localization of proteins retrieved for TriTypDB database showing >80% homology among *L. infantum*, *L. major* and *L. braziliensis*.

|                             |                |                 |
|-----------------------------|----------------|-----------------|
|                             | Lysosomal      | 0.003           |
|                             | Mitochondrial  | 1.519           |
|                             | Chloroplast    | 0.449           |
|                             | Peroxisomal    | 0.029           |
|                             | Vacuole        | 0.004           |
|                             | Nuclear        | 0.310           |
| *****                       |                |                 |
| *****                       |                |                 |
| SeqID: li LinJ_32_0870_mRNA |                |                 |
| CELLO prediction:           |                |                 |
| (predictor                  | location       | reliable-index) |
| Composition                 | PlasmaMembrane | 0.657           |
| Di-peptide                  | Extracellular  | 0.277           |
| part-Comp.                  | PlasmaMembrane | 0.841           |
| chemo-typy                  | PlasmaMembrane | 0.289           |
| Neighboring                 | PlasmaMembrane | 0.519           |
| Combined SVM classifier:    |                |                 |
|                             | Extracellular  | 0.684           |
|                             | PlasmaMembrane | 2.486 *         |
|                             | Cytoplasmic    | 0.149           |
|                             | Cytoskeletal   | 0.012           |
|                             | ER             | 0.023           |
|                             | Golgi          | 0.128           |
|                             | Lysosomal      | 0.042           |
|                             | Mitochondrial  | 0.429           |
|                             | Chloroplast    | 0.356           |
|                             | Peroxisomal    | 0.052           |
|                             | Vacuole        | 0.014           |
|                             | Nuclear        | 0.624           |
| *****                       |                |                 |
| *****                       |                |                 |
| SeqID: li LinJ_30_1650_mRNA |                |                 |
| CELLO prediction:           |                |                 |
| (predictor                  | location       | reliable-index) |
| Composition                 | PlasmaMembrane | 0.715           |
| Di-peptide                  | Mitochondrial  | 0.404           |
| part-Comp.                  | Extracellular  | 0.329           |
| chemo-typy                  | Mitochondrial  | 0.285           |
| Neighboring                 | PlasmaMembrane | 0.526           |
| Combined SVM classifier:    |                |                 |
|                             | Extracellular  | 1.144           |
|                             | PlasmaMembrane | 1.952 *         |
|                             | Cytoplasmic    | 0.182           |
|                             | Cytoskeletal   | 0.016           |
|                             | ER             | 0.026           |
|                             | Golgi          | 0.013           |
|                             | Lysosomal      | 0.074           |
|                             | Mitochondrial  | 0.891           |
|                             | Chloroplast    | 0.464           |
|                             | Peroxisomal    | 0.051           |
|                             | Vacuole        | 0.088           |
|                             | Nuclear        | 0.099           |

**Table S1.** Subcellular localization of proteins retrieved for TriTypDB database showing >80% homology among *L. infantum*, *L. major* and *L. braziliensis*.

\*\*\*\*\*

\*\*\*\*\*

SeqID: li|LinJ\_28\_3220\_mRNA|

CELLO prediction:

| (predictor  | location      | reliable-index) |
|-------------|---------------|-----------------|
| Composition | Mitochondrial | 0.591           |
| Di-peptide  | Mitochondrial | 0.732           |
| part-Comp.  | Mitochondrial | 0.744           |
| chemo-typy  | Mitochondrial | 0.569           |
| Neighboring | Mitochondrial | 0.751           |

Combined SVM classifier:

|                |         |
|----------------|---------|
| Extracellular  | 0.172   |
| PlasmaMembrane | 0.021   |
| Cytoplasmic    | 0.361   |
| Cytoskeletal   | 0.010   |
| ER             | 0.016   |
| Golgi          | 0.006   |
| Lysosomal      | 0.012   |
| Mitochondrial  | 3.386 * |
| Chloroplast    | 0.206   |
| Peroxisomal    | 0.072   |
| Vacuole        | 0.016   |
| Nuclear        | 0.723   |

\*\*\*\*\*

\*\*\*\*\*

SeqID: li|LinJ\_08\_0340\_mRNA|

CELLO prediction:

| (predictor  | location      | reliable-index) |
|-------------|---------------|-----------------|
| Composition | Extracellular | 0.722           |
| Di-peptide  | Mitochondrial | 0.265           |
| part-Comp.  | Cytoplasmic   | 0.303           |
| chemo-typy  | Nuclear       | 0.419           |
| Neighboring | Extracellular | 0.366           |

Combined SVM classifier:

|                |         |
|----------------|---------|
| Extracellular  | 1.580 * |
| PlasmaMembrane | 0.045   |
| Cytoplasmic    | 0.924   |
| Cytoskeletal   | 0.017   |
| ER             | 0.029   |
| Golgi          | 0.028   |
| Lysosomal      | 0.020   |
| Mitochondrial  | 0.827   |
| Chloroplast    | 0.321   |
| Peroxisomal    | 0.033   |
| Vacuole        | 0.012   |
| Nuclear        | 1.163 * |

\*\*\*\*\*

\*\*\*\*\*

SeqID: li|LinJ\_36\_6680\_mRNA|

CELLO prediction:

| (predictor  | location      | reliable-index) |
|-------------|---------------|-----------------|
| Composition | Cytoplasmic   | 0.537           |
| Di-peptide  | Cytoplasmic   | 0.441           |
| part-Comp.  | Mitochondrial | 0.639           |
| chemo-typy  | Nuclear       | 0.952           |

**Table S1.** Subcellular localization of proteins retrieved for TriTypDB database showing >80% homology among *L. infantum*, *L. major* and *L. braziliensis*.

|                             |             |                |                 |       |
|-----------------------------|-------------|----------------|-----------------|-------|
|                             | Neighboring | Cytoplasmic    | 0.491           |       |
| Combined SVM classifier:    |             |                |                 |       |
|                             |             | Extracellular  | 0.014           |       |
|                             |             | PlasmaMembrane | 0.010           |       |
|                             |             | Cytoplasmic    | 1.508           | *     |
|                             |             | Cytoskeletal   | 0.024           |       |
|                             |             | ER             | 0.010           |       |
|                             |             | Golgi          | 0.007           |       |
|                             |             | Lysosomal      |                 | 0.004 |
|                             |             | Mitochondrial  | 1.479           | *     |
|                             |             | Chloroplast    | 0.070           |       |
|                             |             | Peroxisomal    | 0.035           |       |
|                             |             | Vacuole        | 0.006           |       |
|                             |             | Nuclear        | 1.831           | *     |
| *****                       |             |                |                 |       |
| *****                       |             |                |                 |       |
| SeqID: li LinJ_24_1240_mRNA |             |                |                 |       |
| CELLO prediction:           |             |                |                 |       |
|                             | (predictor  | location       | reliable-index) |       |
|                             | Composition | Nuclear        | 0.314           |       |
|                             | Di-peptide  | Cytoplasmic    | 0.375           |       |
|                             | part-Comp.  | Nuclear        | 0.431           |       |
|                             | chemo-typy  | Nuclear        | 0.426           |       |
|                             | Neighboring | Nuclear        | 0.606           |       |
| Combined SVM classifier:    |             |                |                 |       |
|                             |             | Extracellular  | 0.258           |       |
|                             |             | PlasmaMembrane | 0.051           |       |
|                             |             | Cytoplasmic    | 1.353           |       |
|                             |             | Cytoskeletal   | 0.039           |       |
|                             |             | ER             | 0.032           |       |
|                             |             | Golgi          | 0.013           |       |
|                             |             | Lysosomal      |                 | 0.013 |
|                             |             | Mitochondrial  | 0.895           |       |
|                             |             | Chloroplast    | 0.211           |       |
|                             |             | Peroxisomal    | 0.061           |       |
|                             |             | Vacuole        | 0.009           |       |
|                             |             | Nuclear        | 2.064           | *     |
| *****                       |             |                |                 |       |
| *****                       |             |                |                 |       |
| SeqID: li LinJ_22_1300_mRNA |             |                |                 |       |
| CELLO prediction:           |             |                |                 |       |
|                             | (predictor  | location       | reliable-index) |       |
|                             | Composition | Extracellular  | 0.496           |       |
|                             | Di-peptide  | Cytoplasmic    | 0.730           |       |
|                             | part-Comp.  | Extracellular  | 0.791           |       |
|                             | chemo-typy  | Extracellular  | 0.835           |       |
|                             | Neighboring | Cytoplasmic    | 0.330           |       |
| Combined SVM classifier:    |             |                |                 |       |
|                             |             | Extracellular  | 2.281           | *     |
|                             |             | PlasmaMembrane | 0.057           |       |
|                             |             | Cytoplasmic    | 1.334           |       |
|                             |             | Cytoskeletal   | 0.007           |       |
|                             |             | ER             | 0.084           |       |
|                             |             | Golgi          | 0.013           |       |

**Table S1.** Subcellular localization of proteins retrieved for TriTypDB database showing >80% homology among *L. infantum*, *L. major* and *L. braziliensis*.

|                             |                |                 |
|-----------------------------|----------------|-----------------|
|                             | Lysosomal      | 0.080           |
|                             | Mitochondrial  | 0.286           |
|                             | Chloroplast    | 0.245           |
|                             | Peroxisomal    | 0.072           |
|                             | Vacuole        | 0.224           |
|                             | Nuclear        | 0.317           |
| *****                       |                |                 |
| *****                       |                |                 |
| SeqID: li LinJ_21_0440_mRNA |                |                 |
| CELLO prediction:           |                |                 |
| (predictor                  | location       | reliable-index) |
| Composition                 | Nuclear        | 0.711           |
| Di-peptide                  | Chloroplast    | 0.591           |
| part-Comp.                  | PlasmaMembrane | 0.265           |
| chemo-typy                  | Nuclear        | 0.443           |
| Neighboring                 | Nuclear        | 0.633           |
| Combined SVM classifier:    |                |                 |
|                             | Extracellular  | 0.191           |
|                             | PlasmaMembrane | 0.499           |
|                             | Cytoplasmic    | 0.344           |
|                             | Cytoskeletal   | 0.237           |
|                             | ER             | 0.017           |
|                             | Golgi          | 0.030           |
|                             | Lysosomal      | 0.020           |
|                             | Mitochondrial  | 0.596           |
|                             | Chloroplast    | 0.920           |
|                             | Peroxisomal    | 0.073           |
|                             | Vacuole        | 0.015           |
|                             | Nuclear        | 2.058 *         |
| *****                       |                |                 |
| *****                       |                |                 |
| SeqID: li LinJ_36_2100_mRNA |                |                 |
| CELLO prediction:           |                |                 |
| (predictor                  | location       | reliable-index) |
| Composition                 | Extracellular  | 0.503           |
| Di-peptide                  | Extracellular  | 0.643           |
| part-Comp.                  | Nuclear        | 0.473           |
| chemo-typy                  | Chloroplast    | 0.360           |
| Neighboring                 | Extracellular  | 0.690           |
| Combined SVM classifier:    |                |                 |
|                             | Extracellular  | 1.921 *         |
|                             | PlasmaMembrane | 0.059           |
|                             | Cytoplasmic    | 0.811           |
|                             | Cytoskeletal   | 0.019           |
|                             | ER             | 0.018           |
|                             | Golgi          | 0.057           |
|                             | Lysosomal      | 0.016           |
|                             | Mitochondrial  | 0.337           |
|                             | Chloroplast    | 0.462           |
|                             | Peroxisomal    | 0.036           |
|                             | Vacuole        | 0.015           |
|                             | Nuclear        | 1.250 *         |

**Table S1.** Subcellular localization of proteins retrieved for TriTypDB database showing >80% homology among *L. infantum*, *L. major* and *L. braziliensis*.

\*\*\*\*\*

\*\*\*\*\*

SeqID: li|LinJ\_35\_5230\_mRNA|

CELLO prediction:

| (predictor  | location      | reliable-index) |
|-------------|---------------|-----------------|
| Composition | Extracellular | 0.488           |
| Di-peptide  | Nuclear       | 0.470           |
| part-Comp.  | Cytoplasmic   | 0.575           |
| chemo-typy  | Nuclear       | 0.483           |
| Neighboring | Nuclear       | 0.299           |

Combined SVM classifier:

|                |         |
|----------------|---------|
| Extracellular  | 0.663   |
| PlasmaMembrane | 0.057   |
| Cytoplasmic    | 1.404 * |
| Cytoskeletal   | 0.041   |
| ER             | 0.034   |
| Golgi          | 0.037   |
| Lysosomal      | 0.009   |
| Mitochondrial  | 0.825   |
| Chloroplast    | 0.257   |
| Peroxisomal    | 0.033   |
| Vacuole        | 0.031   |
| Nuclear        | 1.610 * |

\*\*\*\*\*

\*\*\*\*\*

SeqID: li|LinJ\_24\_1870\_mRNA|

CELLO prediction:

| (predictor  | location      | reliable-index) |
|-------------|---------------|-----------------|
| Composition | Cytoplasmic   | 0.321           |
| Di-peptide  | Extracellular | 0.424           |
| part-Comp.  | Cytoplasmic   | 0.476           |
| chemo-typy  | Mitochondrial | 0.346           |
| Neighboring | Nuclear       | 0.377           |

Combined SVM classifier:

|                |         |
|----------------|---------|
| Extracellular  | 0.939   |
| PlasmaMembrane | 0.252   |
| Cytoplasmic    | 1.178 * |
| Cytoskeletal   | 0.024   |
| ER             | 0.032   |
| Golgi          | 0.055   |
| Lysosomal      | 0.026   |
| Mitochondrial  | 0.870   |
| Chloroplast    | 0.566   |
| Peroxisomal    | 0.109   |
| Vacuole        | 0.021   |
| Nuclear        | 0.927   |

\*\*\*\*\*

\*\*\*\*\*

SeqID: li|LinJ\_36\_0510\_mRNA|

CELLO prediction:

| (predictor  | location      | reliable-index) |
|-------------|---------------|-----------------|
| Composition | Cytoplasmic   | 0.354           |
| Di-peptide  | Cytoplasmic   | 0.590           |
| part-Comp.  | Mitochondrial | 0.277           |
| chemo-typy  | Mitochondrial | 0.280           |

**Table S1.** Subcellular localization of proteins retrieved for TriTypDB database showing >80% homology among *L. infantum*, *L. major* and *L. braziliensis*.

|                             |                |               |                 |
|-----------------------------|----------------|---------------|-----------------|
|                             | Neighboring    | Nuclear       | 0.334           |
| Combined SVM classifier:    |                |               |                 |
|                             | Extracellular  |               | 0.646           |
|                             | PlasmaMembrane |               | 0.074           |
|                             | Cytoplasmic    |               | 1.499 *         |
|                             | Cytoskeletal   |               | 0.022           |
|                             | ER             |               | 0.148           |
|                             | Golgi          |               | 0.029           |
|                             | Lysosomal      |               | 0.163           |
|                             | Mitochondrial  |               | 0.983           |
|                             | Chloroplast    |               | 0.376           |
|                             | Peroxisomal    |               | 0.121           |
|                             | Vacuole        |               | 0.066           |
|                             | Nuclear        |               | 0.873           |
| *****                       |                |               |                 |
| *****                       |                |               |                 |
| SeqID: li LinJ_34_0670_mRNA |                |               |                 |
| CELLO prediction:           |                |               |                 |
|                             | (predictor     | location      | reliable-index) |
|                             | Composition    | Mitochondrial | 0.460           |
|                             | Di-peptide     | Chloroplast   | 0.383           |
|                             | part-Comp.     | Nuclear       | 0.546           |
|                             | chemo-typy     | Cytoplasmic   | 0.569           |
|                             | Neighboring    | Mitochondrial | 0.600           |
| Combined SVM classifier:    |                |               |                 |
|                             | Extracellular  |               | 0.136           |
|                             | PlasmaMembrane |               | 0.058           |
|                             | Cytoplasmic    |               | 1.235 *         |
|                             | Cytoskeletal   |               | 0.014           |
|                             | ER             |               | 0.026           |
|                             | Golgi          |               | 0.019           |
|                             | Lysosomal      |               | 0.018           |
|                             | Mitochondrial  |               | 1.642 *         |
|                             | Chloroplast    |               | 0.903           |
|                             | Peroxisomal    |               | 0.112           |
|                             | Vacuole        |               | 0.015           |
|                             | Nuclear        |               | 0.822           |
| *****                       |                |               |                 |
| *****                       |                |               |                 |
| SeqID: li LinJ_13_0460_mRNA |                |               |                 |
| CELLO prediction:           |                |               |                 |
|                             | (predictor     | location      | reliable-index) |
|                             | Composition    | Chloroplast   | 0.255           |
|                             | Di-peptide     | Chloroplast   | 0.402           |
|                             | part-Comp.     | Cytoplasmic   | 0.711           |
|                             | chemo-typy     | Cytoplasmic   | 0.871           |
|                             | Neighboring    | Cytoplasmic   | 0.459           |
| Combined SVM classifier:    |                |               |                 |
|                             | Extracellular  |               | 0.460           |
|                             | PlasmaMembrane |               | 0.072           |
|                             | Cytoplasmic    |               | 2.619 *         |
|                             | Cytoskeletal   |               | 0.019           |
|                             | ER             |               | 0.044           |
|                             | Golgi          |               | 0.052           |

**Table S1.** Subcellular localization of proteins retrieved for TriTypDB database showing >80% homology among *L. infantum*, *L. major* and *L. braziliensis*.

|                             |                |                 |
|-----------------------------|----------------|-----------------|
|                             | Lysosomal      | 0.013           |
|                             | Mitochondrial  | 0.318           |
|                             | Chloroplast    | 0.905           |
|                             | Peroxisomal    | 0.089           |
|                             | Vacuole        | 0.044           |
|                             | Nuclear        | 0.366           |
| *****                       |                |                 |
| *****                       |                |                 |
| SeqID: li LinJ_13_1080_mRNA |                |                 |
| CELLO prediction:           |                |                 |
| (predictor                  | location       | reliable-index) |
| Composition                 | Cytoplasmic    | 0.290           |
| Di-peptide                  | Mitochondrial  | 0.370           |
| part-Comp.                  | Cytoplasmic    | 0.454           |
| chemo-typy                  | Cytoplasmic    | 0.597           |
| Neighboring                 | Nuclear        | 0.247           |
| Combined SVM classifier:    |                |                 |
|                             | Extracellular  | 0.354           |
|                             | PlasmaMembrane | 0.405           |
|                             | Cytoplasmic    | 1.756 *         |
|                             | Cytoskeletal   | 0.020           |
|                             | ER             | 0.130           |
|                             | Golgi          | 0.273           |
|                             | Lysosomal      | 0.035           |
|                             | Mitochondrial  | 0.506           |
|                             | Chloroplast    | 0.264           |
|                             | Peroxisomal    | 0.064           |
|                             | Vacuole        | 0.107           |
|                             | Nuclear        | 1.085 *         |
| *****                       |                |                 |
| *****                       |                |                 |
| SeqID: li LinJ_22_0490_mRNA |                |                 |
| CELLO prediction:           |                |                 |
| (predictor                  | location       | reliable-index) |
| Composition                 | Cytoplasmic    | 0.532           |
| Di-peptide                  | Cytoplasmic    | 0.733           |
| part-Comp.                  | Cytoplasmic    | 0.540           |
| chemo-typy                  | Cytoplasmic    | 0.928           |
| Neighboring                 | Cytoplasmic    | 0.752           |
| Combined SVM classifier:    |                |                 |
|                             | Extracellular  | 0.023           |
|                             | PlasmaMembrane | 0.009           |
|                             | Cytoplasmic    | 3.485 *         |
|                             | Cytoskeletal   | 0.024           |
|                             | ER             | 0.040           |
|                             | Golgi          | 0.035           |
|                             | Lysosomal      | 0.002           |
|                             | Mitochondrial  | 0.653           |
|                             | Chloroplast    | 0.182           |
|                             | Peroxisomal    | 0.036           |
|                             | Vacuole        | 0.014           |
|                             | Nuclear        | 0.496           |



**Table S1.** Subcellular localization of proteins retrieved for TriTypDB database showing >80% homology among *L. infantum*, *L. major* and *L. braziliensis*.

\*\*\*\*\*

\*\*\*\*\*

SeqID: li|LinJ\_34\_3440\_mRNA|

CELLO prediction:

| (predictor  | location      | reliable-index) |
|-------------|---------------|-----------------|
| Composition | Cytoplasmic   | 0.707           |
| Di-peptide  | Mitochondrial | 0.687           |
| part-Comp.  | Mitochondrial | 0.445           |
| chemo-typy  | Nuclear       | 0.553           |
| Neighboring | Cytoplasmic   | 0.408           |

Combined SVM classifier:

|                |         |
|----------------|---------|
| Extracellular  | 0.033   |
| PlasmaMembrane | 0.026   |
| Cytoplasmic    | 1.484 * |
| Cytoskeletal   | 0.013   |
| ER             | 0.012   |
| Golgi          | 0.012   |
| Lysosomal      | 0.009   |
| Mitochondrial  | 2.116 * |
| Chloroplast    | 0.190   |
| Peroxisomal    | 0.115   |
| Vacuole        | 0.015   |
| Nuclear        | 0.975   |

\*\*\*\*\*

\*\*\*\*\*

SeqID: li|LinJ\_31\_0930\_mRNA|

CELLO prediction:

| (predictor  | location      | reliable-index) |
|-------------|---------------|-----------------|
| Composition | Mitochondrial | 0.244           |
| Di-peptide  | Cytoplasmic   | 0.308           |
| part-Comp.  | Chloroplast   | 0.500           |
| chemo-typy  | Extracellular | 0.479           |
| Neighboring | Extracellular | 0.256           |

Combined SVM classifier:

|                |         |
|----------------|---------|
| Extracellular  | 1.288 * |
| PlasmaMembrane | 0.714   |
| Cytoplasmic    | 0.711   |
| Cytoskeletal   | 0.014   |
| ER             | 0.066   |
| Golgi          | 0.022   |
| Lysosomal      | 0.022   |
| Mitochondrial  | 0.645   |
| Chloroplast    | 1.096 * |
| Peroxisomal    | 0.044   |
| Vacuole        | 0.034   |
| Nuclear        | 0.344   |

\*\*\*\*\*

\*\*\*\*\*

SeqID: li|LinJ\_27\_1450\_mRNA|

CELLO prediction:

| (predictor  | location    | reliable-index) |
|-------------|-------------|-----------------|
| Composition | Nuclear     | 0.368           |
| Di-peptide  | Nuclear     | 0.778           |
| part-Comp.  | Nuclear     | 0.729           |
| chemo-typy  | Cytoplasmic | 0.674           |

**Table S1.** Subcellular localization of proteins retrieved for TriTypDB database showing >80% homology among *L. infantum*, *L. major* and *L. braziliensis*.

|                             |             |                |                 |       |
|-----------------------------|-------------|----------------|-----------------|-------|
|                             | Neighboring | Nuclear        | 0.516           |       |
| Combined SVM classifier:    |             |                |                 |       |
|                             |             | Extracellular  | 0.107           |       |
|                             |             | PlasmaMembrane | 0.016           |       |
|                             |             | Cytoplasmic    | 1.238           |       |
|                             |             | Cytoskeletal   | 0.082           |       |
|                             |             | ER             | 0.012           |       |
|                             |             | Golgi          | 0.153           |       |
|                             |             | Lysosomal      |                 | 0.007 |
|                             |             | Mitochondrial  | 0.784           |       |
|                             |             | Chloroplast    | 0.086           |       |
|                             |             | Peroxisomal    | 0.022           |       |
|                             |             | Vacuole        | 0.007           |       |
|                             |             | Nuclear        | 2.484           | *     |
| *****                       |             |                |                 |       |
| *****                       |             |                |                 |       |
| SeqID: li LinJ_21_0800_mRNA |             |                |                 |       |
| CELLO prediction:           |             |                |                 |       |
|                             | (predictor  | location       | reliable-index) |       |
|                             | Composition | Cytoplasmic    | 0.742           |       |
|                             | Di-peptide  | Nuclear        | 0.588           |       |
|                             | part-Comp.  | Nuclear        | 0.464           |       |
|                             | chemo-typy  | Nuclear        | 0.901           |       |
|                             | Neighboring | Nuclear        | 0.392           |       |
| Combined SVM classifier:    |             |                |                 |       |
|                             |             | Extracellular  | 0.072           |       |
|                             |             | PlasmaMembrane | 0.023           |       |
|                             |             | Cytoplasmic    | 1.346           |       |
|                             |             | Cytoskeletal   | 0.018           |       |
|                             |             | ER             | 0.015           |       |
|                             |             | Golgi          | 0.008           |       |
|                             |             | Lysosomal      |                 | 0.008 |
|                             |             | Mitochondrial  | 0.907           |       |
|                             |             | Chloroplast    | 0.103           |       |
|                             |             | Peroxisomal    | 0.024           |       |
|                             |             | Vacuole        | 0.011           |       |
|                             |             | Nuclear        | 2.464           | *     |
| *****                       |             |                |                 |       |
| *****                       |             |                |                 |       |
| SeqID: li LinJ_35_0240_mRNA |             |                |                 |       |
| CELLO prediction:           |             |                |                 |       |
|                             | (predictor  | location       | reliable-index) |       |
|                             | Composition | Extracellular  | 0.659           |       |
|                             | Di-peptide  | Nuclear        | 0.297           |       |
|                             | part-Comp.  | Mitochondrial  | 0.315           |       |
|                             | chemo-typy  | Nuclear        | 0.694           |       |
|                             | Neighboring | Nuclear        | 0.466           |       |
| Combined SVM classifier:    |             |                |                 |       |
|                             |             | Extracellular  | 1.447           | *     |
|                             |             | PlasmaMembrane | 0.049           |       |
|                             |             | Cytoplasmic    | 0.428           |       |
|                             |             | Cytoskeletal   | 0.009           |       |
|                             |             | ER             | 0.013           |       |
|                             |             | Golgi          | 0.014           |       |

**Table S1.** Subcellular localization of proteins retrieved for TriTypDB database showing >80% homology among *L. infantum*, *L. major* and *L. braziliensis*.

|                             |                |                 |
|-----------------------------|----------------|-----------------|
|                             | Lysosomal      | 0.016           |
|                             | Mitochondrial  | 0.902           |
|                             | Chloroplast    | 0.261           |
|                             | Peroxisomal    | 0.050           |
|                             | Vacuole        | 0.009           |
|                             | Nuclear        | 1.802 *         |
| *****                       |                |                 |
| *****                       |                |                 |
| SeqID: li LinJ_10_0830_mRNA |                |                 |
| CELLO prediction:           |                |                 |
| (predictor                  | location       | reliable-index) |
| Composition                 | Extracellular  | 0.449           |
| Di-peptide                  | Extracellular  | 0.206           |
| part-Comp.                  | Extracellular  | 0.912           |
| chemo-typy                  | Nuclear        | 0.462           |
| Neighboring                 | Cytoplasmic    | 0.390           |
| Combined SVM classifier:    |                |                 |
|                             | Extracellular  | 2.017 *         |
|                             | PlasmaMembrane | 0.584           |
|                             | Cytoplasmic    | 0.833           |
|                             | Cytoskeletal   | 0.014           |
|                             | ER             | 0.161           |
|                             | Golgi          | 0.066           |
|                             | Lysosomal      | 0.102           |
|                             | Mitochondrial  | 0.185           |
|                             | Chloroplast    | 0.139           |
|                             | Peroxisomal    | 0.099           |
|                             | Vacuole        | 0.104           |
|                             | Nuclear        | 0.695           |
| *****                       |                |                 |
| *****                       |                |                 |
| SeqID: li LinJ_36_4070_mRNA |                |                 |
| CELLO prediction:           |                |                 |
| (predictor                  | location       | reliable-index) |
| Composition                 | PlasmaMembrane | 0.359           |
| Di-peptide                  | Extracellular  | 0.593           |
| part-Comp.                  | Extracellular  | 0.609           |
| chemo-typy                  | Chloroplast    | 0.230           |
| Neighboring                 | Extracellular  | 0.606           |
| Combined SVM classifier:    |                |                 |
|                             | Extracellular  | 2.224 *         |
|                             | PlasmaMembrane | 0.546           |
|                             | Cytoplasmic    | 0.484           |
|                             | Cytoskeletal   | 0.010           |
|                             | ER             | 0.101           |
|                             | Golgi          | 0.041           |
|                             | Lysosomal      | 0.251           |
|                             | Mitochondrial  | 0.421           |
|                             | Chloroplast    | 0.377           |
|                             | Peroxisomal    | 0.125           |
|                             | Vacuole        | 0.131           |
|                             | Nuclear        | 0.287           |

**Table S1.** Subcellular localization of proteins retrieved for TriTypDB database showing >80% homology among *L. infantum*, *L. major* and *L. braziliensis*.

\*\*\*\*\*

\*\*\*\*\*

SeqID: li|LinJ\_35\_1310\_mRNA|

CELLO prediction:

| (predictor  | location      | reliable-index) |
|-------------|---------------|-----------------|
| Composition | Mitochondrial | 0.359           |
| Di-peptide  | Nuclear       | 0.288           |
| part-Comp.  | Nuclear       | 0.425           |
| chemo-typy  | Nuclear       | 0.323           |
| Neighboring | Mitochondrial | 0.342           |

Combined SVM classifier:

|                |         |
|----------------|---------|
| Extracellular  | 0.541   |
| PlasmaMembrane | 0.112   |
| Cytoplasmic    | 0.899   |
| Cytoskeletal   | 0.022   |
| ER             | 0.029   |
| Golgi          | 0.019   |
| Lysosomal      | 0.061   |
| Mitochondrial  | 1.263 * |
| Chloroplast    | 0.484   |
| Peroxisomal    | 0.120   |
| Vacuole        | 0.059   |
| Nuclear        | 1.391 * |

\*\*\*\*\*

\*\*\*\*\*

SeqID: li|LinJ\_34\_2720\_mRNA|

CELLO prediction:

| (predictor  | location      | reliable-index) |
|-------------|---------------|-----------------|
| Composition | Cytoplasmic   | 0.804           |
| Di-peptide  | Mitochondrial | 0.867           |
| part-Comp.  | Mitochondrial | 0.806           |
| chemo-typy  | Mitochondrial | 0.635           |
| Neighboring | Mitochondrial | 0.567           |

Combined SVM classifier:

|                |         |
|----------------|---------|
| Extracellular  | 0.043   |
| PlasmaMembrane | 0.023   |
| Cytoplasmic    | 1.373   |
| Cytoskeletal   | 0.012   |
| ER             | 0.013   |
| Golgi          | 0.007   |
| Lysosomal      | 0.005   |
| Mitochondrial  | 2.979 * |
| Chloroplast    | 0.175   |
| Peroxisomal    | 0.039   |
| Vacuole        | 0.004   |
| Nuclear        | 0.325   |

\*\*\*\*\*

\*\*\*\*\*
