# Supplementary material for: Immunoinformatics Approach to Design a Multi-Epitope Nanovaccine against Leishmania Parasite: Elicitation of Cellular Immune Responses
Source: MDPI journal article supplement (doi:10.3390/vaccines11020304), 2023-01-30
Supplement: s1 [file s1]

Table S3. Linear and conformational B cell epitopes predicted for LeishChim with ElliPro server

| Protein   | A/A | Linear epitopes                                                                     | Score | Conformational epitopes                                                                                                                                                                                                                                                                                                                                                                                                                                                                                                                                      | Score |
|-----------|-----|-------------------------------------------------------------------------------------|-------|--------------------------------------------------------------------------------------------------------------------------------------------------------------------------------------------------------------------------------------------------------------------------------------------------------------------------------------------------------------------------------------------------------------------------------------------------------------------------------------------------------------------------------------------------------------|-------|
| LeishChim | 1   | 109-<br>RDADNTAITYARYVT-<br>123                                                     | 0.788 | A:E405, A:D406, A:R407                                                                                                                                                                                                                                                                                                                                                                                                                                                                                                                                       | 0.995 |
|           | 2   | 347-<br>IVAAKRFDPTARRYFH<br>QLIAGMYCHSKGFAG<br>YNGLSADIWSCGVVLY<br>VMLAGRLPFEDR-407 | 0.787 | A:S106, A:D110, A:A111, A:D112, A:N113, A:T114,<br>A:A115, A:I116, A:T117                                                                                                                                                                                                                                                                                                                                                                                                                                                                                    | 0.78  |
|           | 3   | 181-EEEIRANAF-189                                                                   | 0.745 | A:A308, A:I309, A:R311, A:S312, A:L313, A:Q315,<br>A:N317, A:F344, A:I347, A:V348, A:A349, A:A350,<br>A:K351, A:R352, A:F353, A:D354, A:E355, A:P356,<br>A:T357, A:A358, A:R359, A:R360, A:F362, A:H363,<br>A:L365, A:I366, A:A367, A:G368, A:M369, A:Y370,<br>A:Y371, A:C372, A:H373, A:S374, A:K375, A:G376,<br>A:F377, A:A378, A:G379, A:Y380, A:N381, A:G382,<br>A:L383, A:S384, A:A385, A:D386, A:I387, A:W388,<br>A:S389, A:C390, A:G391, A:V392, A:V393, A:L394,<br>A:Y395, A:V396, A:M397, A:L398, A:A399, A:G400,<br>A:R401, A:L402, A:P403, A:F404 | 0.755 |
|           | 4   | 292-<br>PMTPRVVFEDQMLREV<br>AIMRSL-313                                              | 0.715 | A:P269, A:S270, A:F271, A:W272, A:P292, A:M293,<br>A:T294, A:P295, A:R296, A:V297, A:V298, A:F299,<br>A:E300, A:D301, A:Q302, A:M303, A:L304, A:R305,<br>A:E306                                                                                                                                                                                                                                                                                                                                                                                              | 0.743 |
|           | 5   | 51-<br>EICDDTISFDNCMVEQ<br>H-68                                                     | 0.692 | A:H217, A:T218, A:K219, A:E220, A:Q221, A:G224,<br>A:S225, A:P226, A:I227, A:T228, A:C229, A:N230, A:F231,<br>A:E232, A:Y233, A:N234, A:P235, A:R236, A:P237,<br>A:V238, A:R239                                                                                                                                                                                                                                                                                                                                                                              | 0.66  |
|           | 6   | 224-<br>GSPITCNFEYNPRPV-<br>238                                                     | 0.668 | A:N1, A:P2, A:L3, A:R4, A:H5, A:V6, A:Q9, A:N10,<br>A:A11, A:A12, A:V13, A:K27, A:V32, A:Q33, A:A34,<br>A:S35, A:D36, A:Y37, A:A38, A:V39, A:E40, A:A41,<br>A:V42, A:A43, A:K44, A:G45, A:E47, A:R48, A:E51, A:I52,<br>A:C53, A:D54, A:D55, A:T56, A:I57, A:S58, A:S59, A:F60,<br>A:D61, A:N62, A:C63, A:M64, A:V65, A:E66, A:Q67,<br>A:H68, A:A71, A:A72, A:A73, A:T74, A:Q75, A:S76,<br>A:Q77, A:A78, A:L79, A:R80, A:E81, A:I86, A:F177,<br>A:E181, A:E182, A:E183, A:R185, A:A186, A:N187,<br>A:A188, A:F189                                             | 0.632 |
|           | 7   | 71-AAATQSQUALRE-81                                                                  | 0.666 | A:T249, A:T250, A:N251, A:P252, A:Y253, A:N254,<br>A:R255, A:M256, A:L325, A:Q326, A:S327, A:S328,<br>A:N329, A:H330                                                                                                                                                                                                                                                                                                                                                                                                                                         | 0.601 |
|           | 8   | 325-LQSSNH-330                                                                      | 0.659 | A:M212, A:K213, A:P214, A:W215                                                                                                                                                                                                                                                                                                                                                                                                                                                                                                                               | 0.587 |
|           | 9   | 32-<br>VQASDYAVEAVAKGLE<br>R-48                                                     | 0.625 | A:T243, A:M245, A:D246, A:H248                                                                                                                                                                                                                                                                                                                                                                                                                                                                                                                               | 0.586 |
|           | 10  | 212-MKPWKHTKEQ-221                                                                  | 0.615 | A:Y118, A:A119, A:R120, A:Y121, A:V122, A:T123,<br>A:L124, A:E142, A:A144, A:D145, A:V146, A:N147,<br>A:I148, A:T149, A:L150, A:R151, A:N153, A:N154,<br>A:L155, A:R157, A:P158, A:T159, A:G160, A:V161,<br>A:K162, A:H163, A:N164, A:Q165, A:Q166, A:N167,<br>A:A168, A:A169, A:A170, A:F257                                                                                                                                                                                                                                                                | 0.552 |
|           | 11  | 157-RPTGVKHNQQN-<br>167                                                             | 0.599 | A:A83, A:Y87, A:N88, A:H89, A:G90, A:G91, A:I93                                                                                                                                                                                                                                                                                                                                                                                                                                                                                                              | 0.541 |
|           | 12  | 245-MDAHTTNPYNR-<br>255                                                             | 0.599 |                                                                                                                                                                                                                                                                                                                                                                                                                                                                                                                                                              |       |

|  |    |              |       |
|--|----|--------------|-------|
|  | 13 | 1-NPLRHV-6   | 0.563 |
|  | 14 | 86-IYNHGG-91 | 0.557 |
