# Supplementary material for: Immunoinformatics Approach to Design a Multi-Epitope Nanovaccine against Leishmania Parasite: Elicitation of Cellular Immune Responses
Source: MDPI journal article supplement (doi:10.3390/vaccines11020304), 2023-01-30
Supplement: s1 [file s1]

**Table S4.** CTL and HTL epitopes predicted for LeishChim with NetCTL and IEDB servers, respectively. Epitopes originally retrieved from *Leishmania* proteins are shown in blue font

| No | CTL        |            | HTL        |                 |
|----|------------|------------|------------|-----------------|
|    | Residue No | Epitope    | Residue No | Epitope         |
| 1  | 8          | MQNAAVTSA  | 1          | NPLRHVLMQNAAVTS |
| 2  | 10         | NAAVTSAGY  | 116        | ITYARYVTLQLDMGE |
| 3  | 12         | AVTSAGYAI  | 166        | QNAAAYFPLDTFTRL |
| 4  | 19         | AIPHPLEPK  | 186        | ANAFFSRLPIARIQR |
| 5  | 22         | HPLEPKMLL  | 191        | SRLPIARIQRALAME |
| 6  | 24         | LEPKMLLHV  | 196        | ARIQRALAMEAIKKG |
| 7  | 29         | LLHVQASDY  | 201        | ALAMEAIKKGSMKPW |
| 8  | 34         | ASDYAVEAV  | 251        | NPYNRMFWRTVLNED |
| 9  | 41         | AVAKGLERL  | 301        | DQMLREVAIMRSLRQ |
| 10 | 69         | RMAAATQSQ  | 306        | EVAIMRSLRQQNVVK |
| 11 | 71         | AAATQSQAL  | 356        | PTARRYFHQLIAGMY |
| 12 | 78         | ALREIAANI  |            |                 |
| 13 | 79         | LREIAANIY  |            |                 |
| 14 | 81         | EIAANIYNH  |            |                 |
| 15 | 85         | NIYNHGGLI  |            |                 |
| 16 | 88         | NHGGLIRKL  |            |                 |
| 17 | 95         | KLSNEGILR  |            |                 |
| 18 | 97         | SNEGILRPY  |            |                 |
| 19 | 101        | ILRPYSRFR  |            |                 |
| 20 | 103        | RPYSRFRDA  |            |                 |
| 21 | 108        | FRDADNTAI  |            |                 |
| 22 | 110        | DADNTAITY  |            |                 |
| 23 | 113        | NTAITYARY  |            |                 |
| 24 | 116        | ITYARYVTL  |            |                 |
| 25 | 117        | TYARYVTLQ  |            |                 |
| 26 | 118        | YARYVTLQL  |            |                 |
| 27 | 120        | RYVTLQLDM  |            |                 |
| 28 | 142        | EHADVNTIL  |            |                 |
| 29 | 144        | ADVNTILRL  |            |                 |
| 30 | 154        | NLERPTGVK  |            |                 |
| 31 | 163        | HNQQNAAAY  |            |                 |
| 32 | 164        | NQQNAAAYF  |            |                 |
| 33 | 166        | QNAAAYFPL  |            |                 |
| 34 | 169        | AAAYFPLDTF |            |                 |
| 35 | 171        | YFPLDTFTR  |            |                 |
| 36 | 172        | FPLDTFTRL  |            |                 |
| 37 | 181        | EEEIRANAF  |            |                 |
| 38 | 182        | EEIRANAFF  |            |                 |
| 39 | 184        | IRANAFFSR  |            |                 |
| 40 | 185        | RANAFFSRL  |            |                 |
| 41 | 185        | RANAFFSRL  |            |                 |
| 42 | 192        | RLPIARIQR  |            |                 |
| 43 | 194        | PIARIQRAL  |            |                 |
| 44 | 196        | ARIQRALAM  |            |                 |
| 45 | 198        | IQRALAMEA  |            |                 |
| 46 | 199        | QRALAMEAI  |            |                 |

**Table S4.** CTL and HTL epitopes predicted for LeishChim with NetCTL and IEDB servers, respectively. Epitopes originally retrieved from *Leishmania* proteins are shown in blue font

|    |     |            |  |  |
|----|-----|------------|--|--|
| 47 | 200 | RALAMEAIK  |  |  |
| 48 | 201 | ALAMEAIKK  |  |  |
| 49 | 211 | SMKPWKHTK  |  |  |
| 50 | 213 | KPWKHTKEQ  |  |  |
| 51 | 219 | KEQIIIGSPI |  |  |
| 52 | 223 | IGSPITCNF  |  |  |
| 53 | 225 | SPITCNFEY  |  |  |
| 54 | 232 | EYNRPVRL   |  |  |
| 55 | 234 | NPRPVRLIG  |  |  |
| 56 | 236 | RPVRLIGTV  |  |  |
| 57 | 237 | PVRLIGTVM  |  |  |
| 58 | 239 | RLIGTVMDA  |  |  |
| 59 | 245 | MDAHTTNPY  |  |  |
| 60 | 248 | HTTNPYNRM  |  |  |
| 61 | 249 | TTNPYNRMF  |  |  |
| 62 | 254 | NRMFWRTVL  |  |  |
| 63 | 255 | RMFWRTVLN  |  |  |
| 64 | 258 | WRTVLNEDF  |  |  |
| 65 | 263 | NEDFARPSF  |  |  |
| 66 | 265 | DFARPSFWV  |  |  |
| 67 | 268 | RPSFWVSDF  |  |  |
| 68 | 280 | KPQRESRHL  |  |  |
| 69 | 282 | QRESRHLPV  |  |  |
| 70 | 283 | RESRHLPVM  |  |  |
| 71 | 285 | SRHLPVMPM  |  |  |
| 72 | 288 | LPVMPMTPR  |  |  |
| 73 | 291 | MPMTPRVVF  |  |  |
| 74 | 297 | VVFEDQMLR  |  |  |
| 75 | 299 | FEDQMLREV  |  |  |
| 76 | 302 | QMLREVAIM  |  |  |
| 77 | 303 | MLREVAIMR  |  |  |
| 78 | 305 | REVAIMRSL  |  |  |
| 79 | 312 | SLRQQNVVK  |  |  |
| 80 | 313 | LRQQNVVKL  |  |  |
| 81 | 317 | NVVKLQEV   |  |  |
| 82 | 323 | EVLQSSNHY  |  |  |
| 83 | 324 | VLQSSNHYY  |  |  |
| 84 | 325 | LQSSNHYYL  |  |  |
| 85 | 326 | QSSNHYYLV  |  |  |
| 86 | 327 | SSNHYYLVL  |  |  |
| 87 | 329 | NHYYLVLEL  |  |  |
| 88 | 330 | HYLVLELV   |  |  |
| 89 | 331 | YYLVLELVT  |  |  |
| 90 | 335 | LELVTGGEL  |  |  |
| 91 | 336 | ELVTGGELF  |  |  |
| 92 | 341 | GELFDKIVA  |  |  |
| 93 | 342 | ELFDKIVAA  |  |  |
| 94 | 351 | KRFDEPTAR  |  |  |
| 95 | 357 | TARRYFHQ   |  |  |

**Table S4.** CTL and HTL epitopes predicted for LeishChim with NetCTL and IEDB servers, respectively. Epitopes originally retrieved from *Leishmania* proteins are shown in blue font

|     |     |           |  |  |
|-----|-----|-----------|--|--|
| 96  | 359 | RRYFHQLIA |  |  |
| 97  | 361 | YFHQLIAGM |  |  |
| 98  | 363 | HQLIAGMY  |  |  |
| 99  | 369 | MYCHSKGF  |  |  |
| 100 | 379 | GYNGLSADI |  |  |
| 101 | 384 | SADIWSCGV |  |  |
| 102 | 387 | IWSCGVVLY |  |  |
| 103 | 388 | WSCGVVLYV |  |  |
| 104 | 393 | VLYVMLAGR |  |  |
| 105 | 394 | LYVMLAGRL |  |  |
| 106 | 396 | VMLAGRLPF |  |  |
