# Supplementary material for: Immunoinformatics Approach to Design a Multi-Epitope Nanovaccine against Leishmania Parasite: Elicitation of Cellular Immune Responses
Source: Vaccines (Basel). 2023 Jan 30;11(2):304. doi: 10.3390/vaccines11020304 (PMC9960668; doi:10.3390/vaccines11020304)
Supplement: Supplementary file 1 [file vaccines-11-00304-s001.zip]

Archive with 6 entries (6 files):
- File S1_Revised_Round2.pdf
- File S2_Human & Murine MHCI and MHCII epitopes.xlsx
- Table S1.pdf
- Table S2.pdf
- Table S3.pdf
- Table S4.pdf
