# Supplementary material for: Immunoinformatics Approach to Design a Multi-Epitope Nanovaccine against Leishmania Parasite: Elicitation of Cellular Immune Responses
Source: Vaccines (Basel). 2023 Jan 30;11(2):304. doi: 10.3390/vaccines11020304 (PMC9960668; doi:10.3390/vaccines11020304)
Supplement: Supplementary file 1 [file vaccines-11-00304-s001.zip › File S2_Human & Murine MHCI and MHCII epitopes.xlsx]

## Sheet: MHCI
	MHCI
	protein code	Human	Murine
1	LinJ.08.1290	265-FFMMGFAPL	60-VPRAVLMDL
		159-YPDRIMMTF	78-AGPYGQLFR
			105-HYTEGAELI
			143-TGSGMGTLL
			159-YPDRIMMTF
			242-FPGQLNSDL
			258-VPFPRLHFF
			259-PFPRLHFFM
			260-FPRLHFFMM
			345-IPNNIKSSI
			366-TFIGNNTCI
			381-VGEQFTGMF
			386-TGMFRRKAF
2	LinJ.08.1280	265-FFMMGFAPL	60-VPRAVLMDL
		159-YPDRIMMTF	78-AGPYGQLFR
			105-HYTEGAELI
			143-TGSGMGTLL
			159-YPDRIMMTF
			242-FPGQLNSDL
			258-VPFPRLHFF
			259-PFPRLHFFM
			260-FPRLHFFMM
			345-IPNNIKSSI
			366-TFIGNNTCI
			381-VGEQFTGMF
			386-TGMFRRKAF
3	LinJ.21.2240	265-FFMMGFAPL	60-VPRAVLMDL
		159-YPDRIMMTF	78-AGPYGQLFR
			105-HYTEGAELI
			143-TGSGMGTLL
			159-YPDRIMMTF
			242-FPGQLNSDL
			258-VPFPRLHFF
			259-PFPRLHFFM
			260-FPRLHFFMM
			345-IPNNIKSSI
			366-TFIGNNTCI
			381-VGEQFTGMF
			386-TGMFRRKAF
4	LinJ.22.1300	73-LLYYKGTPF	51-VVPRTSENF
		101-RSNVSVFGY	108-GYPFPDESF
			134-GPNQNGSQF
			136-NQNGSQFFF
			155-KFVVVGQVL
			216-MPGKEVLDL
5	LinJ.21.0440	6-YQAGFLSIL	5-SYQAGFLSI
		164-RLYFSDRLY	9-GFLSILYSI
		173-AEEELPPEF	14-LYSIGSKPL
			81-KNMKKYFSF
			85-KYFSFEVTI
			177-LPPEFKLFL
6	LinJ.36.6680	94-SEADRAKVL	37-NYLKRVRGI
		152-KVTFVGETF	81-GPKNALPGF
		168-ERFIRPMAL	184-THPELKATF
			230-VTPSGKVVW
			238-WGKYAQVTN
			240-KYAQVTNNP
7	LinJ.16.0470	NONE	6-GYKSGTRHL
			22-HGAPSVSTI
			55-KYYHGRTGI
			67-VTPRGVGVI
			114-AYLAAKKAG
8	LinJ.32.0930	101-KTGAVSQAY	3-KPHLRHYQV
			21-NPEPTVYKF
			131-IPDHEVKHL
			145-HAPNLSFPL
			146-APNLSFPLL
9	LinJ.24.0040	39-MPLRKAQQL	39-MPLRKAQQL
		83-WPRKSVVAM	87-SVVAMMSLL
			138-PYMCSPCHV
			142-SPCHVQLFM
10	LinJ.34.0420	59-ITYARYVTL	109-QNAAAYFPL
		115-FPLDTFTRL	113-AYFPLDTFT
			115-FPLDTFTRL
			119-TFTRLEEEI
11	LinJ.18.0650	NONE	81-HYYLVLELV
			121-YYCHSKGFA
			181-GYNGLSADI
			196-LYVMLAGRL
12	LinJ.28.2200	44-NESTAVVTF	4-FHPRDAFIL
		70-NAAVTSAGY	80-IPHPLEPKM
		82-HPLEPKMLL	82-HPLEPKMLL
13	LinJ.28.0780	111-MPMTPRVVF	34-TNPYNRMFW
			100-KPQRESRHL
			111-MPMTPRVVF
14	LinJ.35.1540	14-RAARVSLVF	244-VPIPNEGLF
		23-KQLEGNMPL	246-IPNEGLFNG
		110-EEFFRKHIL	281-VPPYRWIDD
		146-ILMARYAVL
		148-MARYAVLPL
		269-RIRQGPAPL
15	LinJ.20.0250	26-RSSRDELAY-34	71-YYWAILCAV
		86-HALVFNYYY-94	81-GYLAAHALV
		94-YPDDLRPNY	134-VYSKRKAAV
		123-DEMVGLSVL
		129-SVLESVYSK-137
16	LinJ.36.5660	14-YTNLQVPSY	21-SYVPSEALM
		33-GQFLRAFLL	169-NPNAAAMAL
		90-RVMDDISKL
		100-RTYVERAEY
17	LinJ.34.3620	92-RVFPAVAHR	58-VPLSDQVKL
			177-KYHLKAVVL
18	LinJ.33.1560	19-RLFVGQLNF	93-SYCRRSERI
		30-TEHDLRQIF	102-SPFGYEHAM
		33-DLRQIFSFY
19	LinJ.33.3340	51-ALLAHVIAF	57-IAFDKHFNL
			89-LFLRGESVI
20	LinJ.35.3810	120-IVKARYVSK	70-KPTINLNNL
21	LinJ.28.0210	100-REIQTSARL	128-KYNASRGEA
22	LinJ.10.0050	25-NRNRKAPRL	109-RPHGNAGMM-
		34-YMKGTLAGY
		62-NTREDATWY
		95-ARRSTTRAL
23	LinJ.20.0600	NONE	56-SPITCNFEY-64
24	LinJ.27.1450	36-MANSSLFKM	NONE
		56-RMKLHESPF
		74-HPTKHNVEL
25	LinJ.35.1030	45-KTRHPQLTY	18-GSGSFGEIF
		70-IPMMFYHGV	52-TYESRFYRI
			90-LGPSLEDLF
			103-RRLSLKTTL
			122-EFVHSKSVL
			160-KYRDPRTHA
			162-RDPRTHAHI
			170-IPYKEGKSL
			179-TGTARYCSI
			183-RYCSINTHM
			255-AYMNYVRAL
26	LinJ.28.2940	71-VSLAHATDY	19-CPQQAGSYI
		188-RTLKGHSNY	25-SYIKVVSTS
			195-NYVSTVTVS
			230-FKINVESPI
			235-ESPINQIAF

## Sheet: MHCII
	MHCII
	protein code	Human	Murine
1	LinJ.08.1290	161- DRIMMTFSVIPSPRV	57-GRYVPRAVLMDLEPG
		306-RHGRYLTASALFRGR	70-PGTMDSVRAGPYGQL
		160-PDRIMMTFSVIPSPR	158-EYPDRIMMTFSVIPS
		164-MMTFSVIPSPRVSDT	159-YPDRIMMTFSVIPSP
			160-PDRIMMTFSVIPSPR
			161-DRIMMTFSVIPSPRV
			162- RIMMTFSVIPSPRVS
			163-IMMTFSVIPSPRVSD
			221-TFGDLNHLVAAVMSG
			222-FGDLNHLVAAVMSGV
			223-GDLNHLVAAVMSGVT
			224-DLNHLVAAVMSGVTC
			225-LNHLVAAVMSGVTCC
			226-NHLVAAVMSGVTCCL
			247-NSDLRKLAVNLVPFP
			278-SQQYRGLSVAELTQQ
			304-DPRHGRYLTASALFR
			305-PRHGRYLTASALFRG
			306-RHGRYLTASALFRGR
			307- HGRYLTASALFRGRM
			308- GRYLTASALFRGRMS
			309-RYLTASALFRGRMST
			309-RYLTASALFRGRMST
			310-YLTASALFRGRMSTK
			311-LTASALFRGRMSTKE
			312-TASALFRGRMSTKEV
			313-ASALFRGRMSTKEVD
			314-SALFRGRMSTKEVDE
			315-ALFRGRMSTKEVDEQ
			380-RVGEQFTGMFRRKAF
			381-VGEQFTGMFRRKAFL
			382-GEQFTGMFRRKAFLH
			383-EQFTGMFRRKAFLHW
			384-QFTGMFRRKAFLHWY
			385-FTGMFRRKAFLHWYT
			386-TGMFRRKAFLHWYTG
			387-GMFRRKAFLHWYTGE
			388-MFRRKAFLHWYTGEG
2	LinJ.08.1280	160-PDRIMMTFSVIPSPR	57-GRYVPRAVLMDLEPG
		164-MMTFSVIPSPRVSDT	70-PGTMDSVRAGPYGQL
		264-HFFMMGFAPLTSRGS	158-EYPDRIMMTFSVIPS
			159-YPDRIMMTFSVIPSP
			160-PDRIMMTFSVIPSPR
			161-DRIMMTFSVIPSPRV
			162- RIMMTFSVIPSPRVS
			163-IMMTFSVIPSPRVSD
			221-TFGDLNHLVAAVMSG
			222-FGDLNHLVAAVMSGV
			223-GDLNHLVAAVMSGVT
			224-DLNHLVAAVMSGVTC
			225-LNHLVAAVMSGVTCC
			226-NHLVAAVMSGVTCCL
			247-NSDLRKLAVNLVPFP
			278-SQQYRGLSVAELTQQ
			304-DPRHGRYLTASALFR
			305-PRHGRYLTASALFRG
			306-RHGRYLTASALFRGR
			307- HGRYLTASALFRGRM
			308- GRYLTASALFRGRMS
			309-RYLTASALFRGRMST
			309-RYLTASALFRGRMST
			310-YLTASALFRGRMSTK
			311-LTASALFRGRMSTKE
			312-TASALFRGRMSTKEV
			313-ASALFRGRMSTKEVD
			314-SALFRGRMSTKEVDE
			315-ALFRGRMSTKEVDEQ
			380-RVGEQFTGMFRRKAF
			381-VGEQFTGMFRRKAFL
			382-GEQFTGMFRRKAFLH
			383-EQFTGMFRRKAFLHW
			384-QFTGMFRRKAFLHWY
			385-FTGMFRRKAFLHWYT
			386-TGMFRRKAFLHWYTG
			387-GMFRRKAFLHWYTGE
			388-MFRRKAFLHWYTGEG
3	LinJ.21.2240	160-PDRIMMTFSVIPSPR	57-GRYVPRAVLMDLEPG
		164-MMTFSVIPSPRVSDT	70-PGTMDSVRAGPYGQL
		264-HFFMMGFAPLTSRGS	158-EYPDRIMMTFSVIPS
			159-YPDRIMMTFSVIPSP
			160-PDRIMMTFSVIPSPR
			161-DRIMMTFSVIPSPRV
			162-RIMMTFSVIPSPRVS
			163-IMMTFSVIPSPRVSD
			164-MMTFSVIPSPRVSDT
			181-EPYNTTLSVHQLVEN
			222-FGDLNHLVAAVMSGV
			223-GDLNHLVAAVMSGVT
			224- DLNHLVAAVMSGVTC
			225-LNHLVAAVMSGVTCC
			226-NHLVAAVMSGVTCCL
			247-NSDLRKLAVNLVPFP
			276-RGSQQYRGLSVAELT
			277-GSQQYRGLSVAELTQ
			278-SQQYRGLSVAELTQQ
			304-DPRHGRYLTASALFR
			305-PRHGRYLTASALFRG
			306-RHGRYLTASALFRGR
			307-HGRYLTASALFRGRI
			308-GRYLTASALFRGRIS
			309-RYLTASALFRGRIST
			310-YLTASALFRGRISTK
			311-LTASALFRGRISTKE
			312-TASALFRGRISTKEV
			313-ASALFRGRISTKEVD
			314-SALFRGRISTKEVDE
			315-ALFRGRISTKEVDEQ
			380-RVGEQFTGMFRRKAF
			381-VGEQFTGMFRRKAFL
			382-GEQFTGMFRRKAFLH
			383-EQFTGMFRRKAFLHW
			384-QFTGMFRRKAFLHWY
			385-FTGMFRRKAFLHWYT
			386-TGMFRRKAFLHWYTG
			387-GMFRRKAFLHWYTGE
			388-MFRRKAFLHWYTGEG
4	LinJ.22.1300	6-RVALQSNRAALYMPY	1-MWCLSRVALQSNRAA
		71-QCLLYYKGTPFHRII	2-WCLSRVALQSNRAAL
		76-YKGTPFHRIIPGFVM	3-CLSRVALQSNRAALY
		141-QFFFNLGRNEQLDRK	4-LSRVALQSNRAALYM
			5-SRVALQSNRAALYMP
			6-RVALQSNRAALYMPY
			7-VALQSNRAALYMPYT
			8-ALQSNRAALYMPYTP
			11-SNRAALYMPYTPVAA
			12-NRAALYMPYTPVAAN
			13-RAALYMPYTPVAANP
			14-AALYMPYTPVAANPV
			15-ALYMPYTPVAANPVV
			16-LYMPYTPVAANPVVY
			17-YMPYTPVAANPVVYF
			37-GDALGRVSVELFRDV
			151-QLDRKFVVVGQVLGG
			179-RCGTPVSRAWISDCG
5	LinJ.21.0440	11-LSILYSIGSKPLQIW	16-SIGSKPLQIWDSQVR
		74- PFLVMIIKNMKKYFS	74- PFLVMIIKNMKKYFS
		111-TTKVKPFICTMPMRL	143- AYGTNYVETLRVQVH
		126-DEGWNQIQFNLSDFT	144-YGTNYVETLRVQVHA
		181-FKLFLPIAQQPPAAA	145-GTNYVETLRVQVHAN
			146-TNYVETLRVQVHANC
			147-NYVETLRVQVHANCR
			148-YVETLRVQVHANCRI
			152-LRVQVHANCRIRRLY
			153-RVQVHANCRIRRLYF
			154-VQVHANCRIRRLYFS
			156-VHANCRIRRLYFSDR
			158-ANCRIRRLYFSDRLY
			159-NCRIRRLYFSDRLYA
			160-CRIRRLYFSDRLYAE
			161-RIRRLYFSDRLYAEE
			165- LYFSDRLYAEEELPP
			183-LFLPIAQQPPAAAAA
			184-FLPIAQQPPAAAAAE
			185-LPIAQQPPAAAAAEQ
			186- PIAQQPPAAAAAEQR
			196-AAEQRDVEAADVPQA
			199-QRDVEAADVPQASSV
			201-DVEAADVPQASSVAQ
6	LinJ.36.6680	36-ANYLKRVRGIKAKLA	6-YIEQAQKRYGRRLDH
		164-MPKMERFIRPMALRF	14-YGRRLDHVERTRKRE
		166-KMERFIRPMALRFKK	15-GRRLDHVERTRKREA
			16-RRLDHVERTRKREAR
			17-RLDHVERTRKREARK
			18-LDHVERTRKREARKA
			19-DHVERTRKREARKAH
			20-HVERTRKREARKAHT
			21-VERTRKREARKAHTD
			32-AHTDANYLKRVRGIK
			33-HTDANYLKRVRGIKA
			34-TDANYLKRVRGIKAK
			35-DANYLKRVRGIKAKL
			36-ANYLKRVRGIKAKLA
			37-NYLKRVRGIKAKLAQ
			38-YLKRVRGIKAKLAQK
			39-LKRVRGIKAKLAQKA
			40-KRVRGIKAKLAQKAR
			41-RVRGIKAKLAQKARY
			42-VRGIKAKLAQKARYA
			48-KLAQKARYAEKAEIR
			50-AQKARYAEKAEIRKK
			51-QKARYAEKAEIRKKI
			52-KARYAEKAEIRKKIR
			53-ARYAEKAEIRKKIRE
			54-RYAEKAEIRKKIREH
			55-YAEKAEIRKKIREHE
			56-AEKAEIRKKIREHEE
			88-GFLMDRSEADRAKVL
			91-MDRSEADRAKVLSNS
			114-AGKWAVPIEKVKTVS
			115-GKWAVPIEKVKTVSE
			116-KWAVPIEKVKTVSED
			125-KTVSEDEMLKAVTSG
			126-TVSEDEMLKAVTSGK
			127-VSEDEMLKAVTSGKR
			128-SEDEMLKAVTSGKRG
			130- DEMLKAVTSGKRGKK
			131-EMLKAVTSGKRGKKS
			133-LKAVTSGKRGKKSWK
			152-KVTFVGETFTRRMPK
			15-ETFTRRMPKMERFIR8
			159-TFTRRMPKMERFIRP
			160-FTRRMPKMERFIRPM
			161-TRRMPKMERFIRPMA
			162-RRMPKMERFIRPMAL
			163-RMPKMERFIRPMALR
			165-PKMERFIRPMALRFK
			166-KMERFIRPMALRFKK
			167-MERFIRPMALRFKKA
			168-ERFIRPMALRFKKAH
			169-RFIRPMALRFKKAHV
			170-FIRPMALRFKKAHVT
			171-IRPMALRFKKAHVTH
			172-RPMALRFKKAHVTHP
			173-PMALRFKKAHVTHPE
			174-MALRFKKAHVTHPEL
			175-ALRFKKAHVTHPELK
			176-LRFKKAHVTHPELKA
			189-KATFCLPIISVKKNP
			205-GKMYTGLGVITKGSV
7	LinJ.16.0470	NONE	106-KAKEHQFQAYLAAKK
			140-PKNVEVLARRVADYE
8	LinJ.32.0930	NONE	36-FVVAKSRFWRMMRVK
			41-SRFWRMMRVKNKVKA
			117-RARYHNIEVLNVKSI
			136-VKHLSIAQYHAPNLS
			148-NLSFPLLQRRIKAAR
9	LinJ.24.0040	NONE	45-QQLYRQVLAKTRCIP
			82-RWPRKSVVAMMSLLK
			83-WPRKSVVAMMSLLKN
			84-PRKSVVAMMSLLKNA
			85-RKSVVAMMSLLKNAE
			86-KSVVAMMSLLKNAEA
			89-VAMMSLLKNAEANAI
			92-MSLLKNAEANAIEKG
			111-QMVIKHVQVDQAARM
10	LinJ.34.0420	56-NTAITYARYVTLQLD	1-MVFYSLVLVMKPRPR
			2-VFYSLVLVMKPRPRK
			3-FYSLVLVMKPRPRKY
			4-YSLVLVMKPRPRKYT
			5-SLVLVMKPRPRKYTS
			6-LVLVMKPRPRKYTSQ
			16-KYTSQALREIAANIY
			17-YTSQALREIAANIYN
			18-TSQALREIAANIYNH
			19-SQALREIAANIYNHG
			20-QALREIAANIYNHGG
			40-SNEGILRPYSRFRDA
			41-NEGILRPYSRFRDAD
			42-EGILRPYSRFRDADN
			43-GILRPYSRFRDADNT
			43-GILRPYSRFRDADNT
			44-ILRPYSRFRDADNTA
			44-ILRPYSRFRDADNTA
			57-TAITYARYVTLQLDM
			58-AITYARYVTLQLDMG
			59-ITYARYVTLQLDMGE
			60-TYARYVTLQLDMGEE
			61-YARYVTLQLDMGEEQ
			139-EQLDMNWKEFSRTRW
			140- QLDMNWKEFSRTRWS
			141-LDMNWKEFSRTRWSN
			142-DMNWKEFSRTRWSNY
			143-MNWKEFSRTRWSNYL
			144-NWKEFSRTRWSNYLR
11	LinJ.18.0650	52-DQMLREVAIMRSLRQ	32- GRTWAIKIVDKRRLK
		55-LREVAIMRSLRQQNV	33- RTWAIKIVDKRRLKK
			34- TWAIKIVDKRRLKKE
			35-WAIKIVDKRRLKKEN
			36- AIKIVDKRRLKKENM
			37-IKIVDKRRLKKENME
			49-NMEDQMLREVAIMRS
			50-MEDQMLREVAIMRSL
			51- EDQMLREVAIMRSLR
			52- DQMLREVAIMRSLRQ
			53-QMLREVAIMRSLRQQ
			54-MLREVAIMRSLRQQN
			55-LREVAIMRSLRQQNV
			56-REVAIMRSLRQQNVV
			57-EVAIMRSLRQQNVVK
			58-VAIMRSLRQQNVVKL
			59-AIMRSLRQQNVVKLQ
			64-LRQQNVVKLQEVLQS
			65-RQQNVVKLQEVLQSS
			66- QQNVVKLQEVLQSSN
			67-QNVVKLQEVLQSSNH
			68-NVVKLQEVLQSSNHY
			78-SSNHYYLVLELVTGG
			80-NHYYLVLELVTGGEL
			92-GELFDKIVAAKRFDE
			93-ELFDKIVAAKRFDEP
			192-CGVVLYVMLAGRLPF
			193-GVVLYVMLAGRLPFE
			194-VVLYVMLAGRLPFED
			195-VLYVMLAGRLPFEDR
			235-DLVARMLTVDPRKRI
			236-LVARMLTVDPRKRIS
			237-VARMLTVDPRKRISM
			238-ARMLTVDPRKRISME
			240-MLTVDPRKRISMEDV
12	LinJ.28.2200	NONE	60-GNPLRHVLMQNAAVT
			61-NPLRHVLMQNAAVTS
			62-PLRHVLMQNAAVTSA
			63-LRHVLMQNAAVTSAG
			64-RHVLMQNAAVTSAGY
			65-HVLMQNAAVTSAGYA
			66-VLMQNAAVTSAGYAI
			67-LMQNAAVTSAGYAIP
			68-MQNAAVTSAGYAIPH
			82-HPLEPKMLLHVQASD
			83-PLEPKMLLHVQASDY
			84-LEPKMLLHVQASDYA
			85-EPKMLLHVQASDYAV
			86-PKMLLHVQASDYAVE
			90-LHVQASDYAVEAVAK
			92-VQASDYAVEAVAKGL
			94-ASDYAVEAVAKGLER
			95-SDYAVEAVAKGLERL
			121-DNCMVEQHRMAAATQ
			122-NCMVEQHRMAAATQP
			123-CMVEQHRMAAATQPE
13	LinJ.28.0780	NONE	3-QCTSLLCRKALQAYP
			4-CTSLLCRKALQAYPV
			5-TSLLCRKALQAYPVP
			6-SLLCRKALQAYPVPP
			7-LLCRKALQAYPVPPR
			8-LCRKALQAYPVPPRA
			9-CRKALQAYPVPPRAR
			10-RKALQAYPVPPRARN
			19-PPRARNYERRWSSSR
			20-PRARNYERRWSSSRT
			21-RARNYERRWSSSRTN
			22-ARNYERRWSSSRTNP
			33-RTNPYNRMFWRTVLN
			34-TNPYNRMFWRTVLNE
			35-NPYNRMFWRTVLNED
			49-DFARPSFWVSDFRHK
			50-FARPSFWVSDFRHKY
			51-ARPSFWVSDFRHKYL
			52-RPSFWVSDFRHKYLA
			53-PSFWVSDFRHKYLAK
			54-SFWVSDFRHKYLAKH
			55-FWVSDFRHKYLAKHG
			57-VSDFRHKYLAKHGMD
			60-FRHKYLAKHGMDYQG
			69-GMDYQGRVPASPAPG
			70-MDYQGRVPASPAPGM
			71-DYQGRVPASPAPGMY
			101-PQRESRHLPVMPMTP
			102-QRESRHLPVMPMTPR
			103-RESRHLPVMPMTPRV
			104-ESRHLPVMPMTPRVV
			105-SRHLPVMPMTPRVVF
			106-RHLPVMPMTPRVVFE
			115- PRVVFEHAQEKRIDY
			124-EKRIDYAKKMHRDRR
			125-KRIDYAKKMHRDRRL
			126-RIDYAKKMHRDRRLV
			127-IDYAKKMHRDRRLVE
			128-DYAKKMHRDRRLVEQ
			129-YAKKMHRDRRLVEQL
			134-HRDRRLVEQLRTHEF
			135-RDRRLVEQLRTHEFW
			145-THEFWGWYMKLQRVR
			146-HEFWGWYMKLQRVRG
			147-EFWGWYMKLQRVRGR
			148-FWGWYMKLQRVRGRW
			149-WGWYMKLQRVRGRWC
			150-GWYMKLQRVRGRWCK
			151-WYMKLQRVRGRWCKE
			152-YMKLQRVRGRWCKEH
14	LinJ.35.1540	4- RSFISAFQATRAARV	1-MFRRSFISAFQATRA
		141-MGFVILMARYAVLP	2-FRRSFISAFQATRAA
			3-RRSFISAFQATRAAR
			4-RSFISAFQATRAARV
			5-SFISAFQATRAARVS
			6-FISAFQATRAARVSL
			7-ISAFQATRAARVSLV
			8-SAFQATRAARVSLVF
			9-AFQATRAARVSLVFK
			10-FQATRAARVSLVFKQ
			11-QATRAARVSLVFKQL
			12-ATRAARVSLVFKQLE
			13-TRAARVSLVFKQLEG
			86-GAPQGRIEATAGVAL
			87-APQGRIEATAGVALK
			88-PQGRIEATAGVALKD
			89-QGRIEATAGVALKDY
			92-IEATAGVALKDYDAS
			110-EEFFRKHILKPKLAD
			111-EFFRKHILKPKLADD
			112-FFRKHILKPKLADDM
			132-VTDYALNSAMLGFVI
			134-DYALNSAMLGFVILM
			141-MLGFVILMARYAVLP
			142-LGFVILMARYAVLPL
			143-GFVILMARYAVLPLW
			144-FVILMARYAVLPLWY
			145-VILMARYAVLPLWYV
			146-ILMARYAVLPLWYVG
			147-LMARYAVLPLWYVGQ
			148-MARYAVLPLWYVGQP
			154-LPLWYVGQPAMSMVG
			155-PLWYVGQPAMSMVGQ
			156-LWYVGQPAMSMVGQM
			157-WYVGQPAMSMVGQMN
			158-YVGQPAMSMVGQMNI
			159-VGQPAMSMVGQMNIE
			160-GQPAMSMVGQMNIEA
			161-QPAMSMVGQMNIEAE
			162-PAMSMVGQMNIEAEI
			163-AMSMVGQMNIEAEIG
			166-MVGQMNIEAEIGELD
			182-RQCTTVVWRGKPVFV
			183-QCTTVVWRGKPVFVY
			184-CTTVVWRGKPVFVYR
			186-TVVWRGKPVFVYRRS
			186-TVVWRGKPVFVYRRS
			187-VVWRGKPVFVYRRSA
			188-VWRGKPVFVYRRSAR
			189-WRGKPVFVYRRSARQ
			190-RGKPVFVYRRSARQM
			191-GKPVFVYRRSARQMK
			192-KPVFVYRRSARQMKE
			193- PVFVYRRSARQMKEV
			194-VFVYRRSARQMKEVM
			195-FVYRRSARQMKEVME
			196-VYRRSARQMKEVMET
			201-ARQMKEVMETPLSAL
			202-RQMKEVMETPLSALK
			203-QMKEVMETPLSALKD
			204-MKEVMETPLSALKDP
			205-KEVMETPLSALKDPE
			218-PETDEARFPDRRDKA
			226-PDRRDKAVVIAICTH
15	LinJ.20.0250	76-LCAVLGYLAAHALVF	1-MRQSPTSLYVDSMHS
			4-SPTSLYVDSMHSNTL
			26-RSSRDELAYRKRKLT
			27-SSRDELAYRKRKLTE
			28-SRDELAYRKRKLTER
			29-RDELAYRKRKLTERG
			30-DELAYRKRKLTERGQ
			31-ELAYRKRKLTERGQY
			43-GQYEQAAKAEEEATQ
			66-AETREYYWAILCAVL
			67-ETREYYWAILCAVLG
			68-TREYYWAILCAVLGY
			69-REYYWAILCAVLGYL
			70-EYYWAILCAVLGYLA
			72-YWAILCAVLGYLAAH
			73-WAILCAVLGYLAAHA
			74-AILCAVLGYLAAHAL
			75-ILCAVLGYLAAHALV
			76-LCAVLGYLAAHALVF
			77-CAVLGYLAAHALVFN
			78-AVLGYLAAHALVFNY
			79-VLGYLAAHALVFNYY
			119-LEAVDEMVGLSVLES
			120-EAVDEMVGLSVLESV
			121-AVDEMVGLSVLESVY
			122-VDEMVGLSVLESVYS
			123-DEMVGLSVLESVYSK
			125-MVGLSVLESVYSKRK
			127-GLSVLESVYSKRKAA
			128-LSVLESVYSKRKAAV
			129-SVLESVYSKRKAAVK
			130-VLESVYSKRKAAVKR
			131-LESVYSKRKAAVKRR
			132-ESVYSKRKAAVKRRL
			133-SVYSKRKAAVKRRLE
			134-VYSKRKAAVKRRLEG
			135-YSKRKAAVKRRLEGS
16	LinJ.36.5660	31-EDGQFLRAFLLRVLA	11-ESRYTNLQVPSYVPS
		33- GQFLRAFLLRVLAND	12-SRYTNLQVPSYVPSE
		36-LRAFLLRVLANDMQR	13-RYTNLQVPSYVPSEA
			14-YTNLQVPSYVPSEAL
			30-HEDGQFLRAFLLRVL
			31-EDGQFLRAFLLRVLA
			32-DGQFLRAFLLRVLAN
			33-GQFLRAFLLRVLAND
			34-QFLRAFLLRVLANDM
			35-FLRAFLLRVLANDMQ
			37-RAFLLRVLANDMQRM
			45-ANDMQRMLATNTCAA
			46-NDMQRMLATNTCAAY
			47-DMQRMLATNTCAAYF
			79-TPENVVMEKRLRVMD
			80-PENVVMEKRLRVMDD
			81-ENVVMEKRLRVMDDI
			82-NVVMEKRLRVMDDIS
			83-VVMEKRLRVMDDISK
			95- ISKLLRTYVERAEYA
			96-SKLLRTYVERAEYAA
			97-KLLRTYVERAEYAAN
			98-LLRTYVERAEYAANK
			166-KDTNPNAAAMALEDP
			206-EPEAVEFRENNRRRM
			207- PEAVEFRENNRRRMA
			208-EAVEFRENNRRRMAQ
			209-AVEFRENNRRRMAQV
			227-YDPRTWMTAAEKRKK
			228-DPRTWMTAAEKRKKA
			229- PRTWMTAAEKRKKAA
			230-RTWMTAAEKRKKAAA
			231-TWMTAAEKRKKAAAE
			236-AEKRKKAAAEKAAAA
			239- RKKAAAEKAAAAGGA
			240-KKAAAEKAAAAGGAA
			241-KAAAEKAAAAGGAAA
			242- AAAEKAAAAGGAAAG
17	LinJ.34.3620	1-MLRFFRARLAPTTTD	1-MLRFFRARLAPTTTD
		76-HVRLIAKATAERFAH	2-LRFFRARLAPTTTDA
		176-HKYHLKAVVLANFFV	3-RFFRARLAPTTTDAA
			4-FFRARLAPTTTDAAA
			9-LAPTTTDAAAKLPAG
			10-APTTTDAAAKLPAGN
			12-TTTDAAAKLPAGNPV
			24-NPVNKTWFRHNLIIR
			25-PVNKTWFRHNLIIRR
			26-VNKTWFRHNLIIRRK
			27-NKTWFRHNLIIRRKG
			28-KTWFRHNLIIRRKGS
			29-TWFRHNLIIRRKGSY
			30-WFRHNLIIRRKGSYR
			31-FRHNLIIRRKGSYRS
			32-RHNLIIRRKGSYRSR
			33-HNLIIRRKGSYRSRW
			34-NLIIRRKGSYRSRWG
			58-VPLSDQVKLHCVDNT
			71-NTNCKHVRLIAKATA
			72-TNCKHVRLIAKATAE
			73-NCKHVRLIAKATAER
			74-CKHVRLIAKATAERF
			75-KHVRLIAKATAERFA
			76-HVRLIAKATAERFAH
			82-KATAERFAHCRVFPA
			83-ATAERFAHCRVFPAV
			84-TAERFAHCRVFPAVA
			85-AERFAHCRVFPAVAH
			86-ERFAHCRVFPAVAHR
			87-RFAHCRVFPAVAHRV
			88-FAHCRVFPAVAHRVS
			90-HCRVFPAVAHRVSVQ
			91-CRVFPAVAHRVSVQR
			92-RVFPAVAHRVSVQRF
			93-VFPAVAHRVSVQRFK
			94-FPAVAHRVSVQRFKG
			95-PAVAHRVSVQRFKGR
			96-AVAHRVSVQRFKGRG
			97-VAHRVSVQRFKGRGR
			98-AHRVSVQRFKGRGRG
			99-HRVSVQRFKGRGRGG
			100-RVSVQRFKGRGRGGE
			101-VSVQRFKGRGRGGEV
			122-PGNIYWVCLFTRRQT
			123-GNIYWVCLFTRRQTN
			124-NIYWVCLFTRRQTNT
			125-IYWVCLFTRRQTNTR
			128-VCLFTRRQTNTRMSG
			129-CLFTRRQTNTRMSGL
			171-GRHVNHKYHLKAVVL
			173-HVNHKYHLKAVVLAN
			174-VNHKYHLKAVVLANF
			175-NHKYHLKAVVLANFF
			176-HKYHLKAVVLANFFV
18	LinJ.33.1560	101-ISPFGYEHAMKLREK	88-KPLQVSYCRRSERIS
			89-PLQVSYCRRSERISP
			90- LQVSYCRRSERISPF
			91-QVSYCRRSERISPFG
			92-VSYCRRSERISPFGY
			93- SYCRRSERISPFGYE
			94-YCRRSERISPFGYEH
			102-SPFGYEHAMKLREKN
			103-PFGYEHAMKLREKNT
			104-FGYEHAMKLREKNTT
19	LinJ.33.3340	41-RVFIQCRNSKALLAH	33-DTAMKEKKRVFIQCR
		46-CRNSKALLAHVIAFD	43-FIQCRNSKALLAHVI
		51-ALLAHVIAFDKHFNL	46-CRNSKALLAHVIAFD
		56-VIAFDKHFNLVLKGV
		86-IENLFLRGESVIFIV
20	LinJ.35.3810	72-TINLNNLSRLIAAEE	76-NNLSRLIAAEEAAKA
		96-LPVVDLQSSGYAKLL	78-LSRLIAAEEAAKATK
		131- DKKIRKAGGAVVLQA	114-HIQVPCIVKARYVSK
21	LinJ.28.0210	46- DLYIHRALRRFFKRG	41-RSQHWDLYIHRALRR
		75-EDMFNRIQTEAVFVA	42-SQHWDLYIHRALRRF
		85- AVFVAKINKVKTLTA	43-QHWDLYIHRALRRFF
		88-VAKINKVKTLTAREI	44-HWDLYIHRALRRFFK
			45-WDLYIHRALRRFFKR
			46-DLYIHRALRRFFKRG
			47-LYIHRALRRFFKRGT
			48-YIHRALRRFFKRGTL
			49-IHRALRRFFKRGTLS
			50-HRALRRFFKRGTLSK
			51-RALRRFFKRGTLSKA
			52-ALRRFFKRGTLSKAA
			53-LRRFFKRGTLSKAAV
			54-RRFFKRGTLSKAAVR
			55-RFFKRGTLSKAAVRV
			56-FFKRGTLSKAAVRVL
			57-FKRGTLSKAAVRVLS
			58-KRGTLSKAAVRVLSS
			59-RGTLSKAAVRVLSSF
			60-GTLSKAAVRVLSSFI
			61- TLSKAAVRVLSSFIE
			62-LSKAAVRVLSSFIED
			63-SKAAVRVLSSFIEDM
			75-EDMFNRIQTEAVFVA
			76-DMFNRIQTEAVFVAK
			77-MFNRIQTEAVFVAKI
			78-FNRIQTEAVFVAKIN
			79-NRIQTEAVFVAKINK
			80-RIQTEAVFVAKINKV
			81-IQTEAVFVAKINKVK
			83-TEAVFVAKINKVKTL
			84-EAVFVAKINKVKTLT
			85-AVFVAKINKVKTLTA
			86-VFVAKINKVKTLTAR
			87-FVAKINKVKTLTARE
			88-VAKINKVKTLTAREI
			89-AKINKVKTLTAREIQ
			90-KINKVKTLTAREIQT
			91-INKVKTLTAREIQTS
			92-NKVKTLTAREIQTSA
			119-MSEGTKAVAKYNASR
			120-SEGTKAVAKYNASRG
			121-EGTKAVAKYNASRGE
			122-GTKAVAKYNASRGEA
22	LinJ.10.0050	NONE	41-SGRETYVKVTGGMKV
			43-RETYVKVTGGMKVKA
			59-RDESSPYAAMMAAQD
			60-DESSPYAAMMAAQDV
			61-ESSPYAAMMAAQDVV
			62-SSPYAAMMAAQDVVA
			63-SPYAAMMAAQDVVAR
			64-PYAAMMAAQDVVARC
			65-YAAMMAAQDVVARCK
			66-AAMMAAQDVVARCKE
			67-AMMAAQDVVARCKEC
			77-RCKECGINALHVKMR
			79-KECGINALHVKMRAV
			80-ECGINALHVKMRAVG
			81-CGINALHVKMRAVGG
			82-GINALHVKMRAVGGV
			83-INALHVKMRAVGGVR
			84-NALHVKMRAVGGVRT
			85-ALHVKMRAVGGVRTK
			86-LHVKMRAVGGVRTKS
			87-HVKMRAVGGVRTKSP
			88-VKMRAVGGVRTKSPG
			89-KMRAVGGVRTKSPGP
			90-MRAVGGVRTKSPGPG
			97-RTKSPGPGAQAALRA
			99-KSPGPGAQAALRALA
			100-SPGPGAQAALRALAR
			101-PGPGAQAALRALARA
			102-GPGAQAALRALARAG
			103-PGAQAALRALARAGM
			104-GAQAALRALARAGMK
			105-AQAALRALARAGMKI
			106-QAALRALARAGMKIG
			107-AALRALARAGMKIGR
			108-ALRALARAGMKIGRI
			109-LRALARAGMKIGRIE
			110-RALARAGMKIGRIED
			126-VPASAIGRRIRVYLY
			129-PTDSTRRKGSRRGRR
23	LinJ.20.0600	6-ERTNRHFFVSRANAF	16-RANAFFSRLPIARIQ
		11-HFFVSRANAFFSRLP	17-ANAFFSRLPIARIQR
		16-RANAFFSRLPIARIQ	18-NAFFSRLPIARIQRA
		21-FSRLPIARIQRALAM	19-AFFSRLPIARIQRAL
		23-RLPIARIQRALAMEA	20-FFSRLPIARIQRALA
		26- IARIQRALAMEAIKK	21-FSRLPIARIQRALAM
			22-SRLPIARIQRALAME
			23-RLPIARIQRALAMEA
			24-LPIARIQRALAMEAI
			25-PIARIQRALAMEAIK
			26-IARIQRALAMEAIKK
			27-ARIQRALAMEAIKKG
			28-RIQRALAMEAIKKGS
			29-IQRALAMEAIKKGSM
			30-QRALAMEAIKKGSMK
			31-RALAMEAIKKGSMKP
			32-ALAMEAIKKGSMKPW
			63-EYNPRPVRLIGTVMD
			64-YNPRPVRLIGTVMDA
			65-NPRPVRLIGTVMDAH
			66-PRPVRLIGTVMDAHT
			67-RPVRLIGTVMDAHTE
			98-ANMMLWIPAGNPKLK
			129- RSKWDEAWLTGRARM
			130-SKWDEAWLTGRARMK
24	LinJ.27.1450	NONE	29-VEQISNTMANSSLFK
			61-ESPFVQIAGYRVPHP
			76-TKHNVELRVQTASNG
			115-VFEEQLRREAQLKGL
			116-FEEQLRREAQLKGLE
			120-LRREAQLKGLEASPS
25	LinJ.35.1030	121-IEFVHSKSVLHRDIK	34-GDPVAIKLEQVKTRH
		201-MEGIGYILMYFLRGS	94- LEDLFSFCGRRLSLK
		256-YMNYVRALRFEDKPD	95-EDLFSFCGRRLSLKT
		271-YSYLKRMFRDLFVRE	96-DLFSFCGRRLSLKTT
			97-LFSFCGRRLSLKTTL
			98-FSFCGRRLSLKTTLM
			99-SFCGRRLSLKTTLML
			103-RRLSLKTTLMLADQM
			108-KTTLMLADQMISRIE
			114- ADQMISRIEFVHSKS
			121-IEFVHSKSVLHRDIK
			123-FVHSKSVLHRDIKPD
			154-DFGLAKKYRDPRTHA
			155- FGLAKKYRDPRTHAH
			156- GLAKKYRDPRTHAHI
			157-LAKKYRDPRTHAHIP
			254-AAYMNYVRALRFEDK
			255- AYMNYVRALRFEDKP
			267- DKPDYSYLKRMFRDL
			268- KPDYSYLKRMFRDLF
			273- YLKRMFRDLFVREGY
			275- KRMFRDLFVREGYHV
			287-YHVDYVFDWTLKRIH
			288-HVDYVFDWTLKRIHE
			289-VDYVFDWTLKRIHES
			290-DYVFDWTLKRIHESL
26	LinJ.28.2940	NONE	12-GWVTSLACPQQAGSY
			20-PQQAGSYIKVVSTSR
			21-QQAGSYIKVVSTSRD
			22-QAGSYIKVVSTSRDG
			36-GTAISWKANPDRHSV
			65-TGFVSCVSLAHATDY
			77-TDYALTASWDRSIRM
			78-DYALTASWDRSIRMW
			79-YALTASWDRSIRMWD
			80-ALTASWDRSIRMWDL
			81-LTASWDRSIRMWDLR
			82-TASWDRSIRMWDLRN
			83-ASWDRSIRMWDLRNG
			97-GQCQRKFLKHTKDVL
			98-QCQRKFLKHTKDVLA
			99-CQRKFLKHTKDVLAV
			100-QRKFLKHTKDVLAVA
			104-LKHTKDVLAVAFSPD
			105-KHTKDVLAVAFSPDD
			160- PSLEHPIVVSGSWDN
			191-KGHSNYVSTVTVSPD
			244-SPNRFWMCVATERS
			245-PNRFWMCVATERSLS
			246-NRFWMCVATERSLSV
			247-RFWMCVATERSLSVY
			248-FWMCVATERSLSVYD
			249-WMCVATERSLSVYDL
			250-MCVATERSLSVYDLE
			251-CVATERSLSVYDLES
			252- VATERSLSVYDLESK
			254- TERSLSVYDLESKAV
			259- SVYDLESKAVIAELT
			262- DLESKAVIAELTPDG
			297-GHKDNLIRVWSISDA
			298-HKDNLIRVWSISDAE
